# Supplementary material for: Identification of Stress-Related Genes and a Comparative Analysis of the Amino Acid Compositions of Translated Coding Sequences Based on Draft Genome Sequences of Antarctic Yeasts
Source: Front Microbiol. 2021 Feb 5;12:623171. doi: 10.3389/fmicb.2021.623171 (PMC7902016; doi:10.3389/fmicb.2021.623171)
Supplement: Supplementary Table 2 — Number of CDS predicted to encode genes related to different stress responses in each yeast. [file Table_2.XLSX]

## Sheet: Stress
	Table S2. Number of CDS predicted to encode genes related to different stress responses in each yeast
	Stress	Protein	Cryptococcus sp.	Candida sake	Leucosporidium creatinivorum	Mrakia gelida	Phenoliferia glacialis	Tetracladium sp.	Vishniacozyma victoriae	Wickerhamomyces anomalus
	Cellular	Dna J		7				1	1
	Cellular	DNA/pantothenate metabolism flavo						1
	Chlorine	Dihydrolipoamide dehydrogenase						1	1
	Cold	18S rRNA biogenesis		2			1		1
	Cold	3 hydroxyacyl CoA dehydrogenase					1		1
	Cold	3 oxoacyl (acyl carrier) synthase	3	2	1	1	1	2	3
	Cold	3 oxoacyl reductase			1				1
	Cold	40S ribosomal S12		1
	Cold	40S ribosomal S13		1
	Cold	40S ribosomal S2		2				1	2
	Cold	40S ribosomal S20			1			1	1
	Cold	40S ribosomal S27 B		1
	Cold	40S ribosomal S3						1
	Cold	60S ribosomal L10		1	1				1
	Cold	60S ribosomal L25		3
	Cold	60S ribosomal L28					1	2
	Cold	60S ribosomal L3		2	3			2	1
	Cold	60S ribosomal l30			1
	Cold	60S ribosomal L33 A		3
	Cold	60S ribosome subunit biogenesis NIP7		1
	Cold	acetyl coenzyme A synthetase		4		3	1
	Cold	Acyl CoA dehydrogenase	3		6	2	2
	Cold	AdoMet dependent rRNA methyltransferase SPB1	4				2
	Cold	ATP dependent RNA helicase		1
	Cold	ATP dependent RNA helicase DBP10		3		1				1
	Cold	ATP dependent RNA helicase DBP3		2
	Cold	ATP dependent RNA helicase DBP7		3				5	5
	Cold	ATP dependent RNA helicase DBP8		2
	Cold	ATP dependent RNA helicase DED1		2				4	3
	Cold	ATP dependent RNA helicase DRS1		2				3	2
	Cold	ATP dependent RNA helicase FAL1		2			1
	Cold	ATP dependent RNA helicase HAS1		2
	Cold	ATP dependent RNA helicase MAK5		2				1	1
	Cold	ATP dependent rRNA helicase RRP3	3	3				1	1
	Cold	ATP utilizing phosphoenolpyruvate carboxykinase			1
	Cold	Cold shock cspLB				1
	Cold	Cold shock DNA binding		2
	Cold	Delta8 fatty acid desaturase		3
	Cold	DNA directed RNA polymerase I subunit A12 (RPA12)		1
	Cold	DNA directed RNA polymerase I subunit RPA12	1
	Cold	DNA directed RNA polymerase I subunit RPA43						1	1
	Cold	DNA directed RNA polymerase I subunit RPA49		2
	Cold	Elongation of fatty acids 3		1
	Cold	Elongation of fatty acids 4								1
	Cold	Fatty acid desaturase			1
	Cold	Fatty acid elongase		1	1
	Cold	Fatty acid elongation			2
	Cold	Fatty acid synthase	1	3				1	1
	Cold	Fatty acyl CoA elongase		1				1
	Cold	G1/S specific cyclin				1	1
	Cold	Glycerol 3 phosphate dehydrogenase		9	1	1			2
	Cold	Glycerol dehydrogenase	1	2		2		2
	Cold	Glycogen debranching		1		1
	Cold	Glycogen synthase		4		3			1
	Cold	Glycogenin glucosyltransferase					1	1	1
	Cold	inositol pentakisphosphate 2 kinase		2	1
	Cold	Inositol phosphosphingolipid phospholipase		1
	Cold	Long chain 3 oxoacyl CoA reductase		4	2
	Cold	Long chain fatty acid CoA ligase		2			1	1
	Cold	Long chain fatty acid CoA ligase and synthetase						2
	Cold	Low temperature responsive		2				2	2
	Cold	Low temperature viability	3	2			1
	Cold	NAD(P)H dependent glycerol 3 phosphate dehydrogenase		2
	Cold	Non essential glycogen phosphorylase				1		1
	Cold	omega 6 fatty acid desaturase (delta 12 desaturase)							1
	Cold	Peptidyl tRNA hydrolase ICT1		1		1
	Cold	Phospholipid:diacylglycerol acyltransferase		1		1
	Cold	Related to delta 5/delta 6 fatty acid desaturase			1
	Cold	Releases glucose 1 phosphate from glycogen			2
	Cold	Rhamnolipids biosynthesis 3 oxoacyl acyl carrier reductase		2
	Cold	Ribosomal 40S subunitS3		1
	Cold	Ribosomal S2		1
	Cold	Ribosomal S3			1
	Cold	rRNA biogenesis RRP5								2
	Cold	Sphingolipid delta 4 desaturase			2
	Cold	Squalene/phytoene synthase domain containing		2
	Cold	Stearoyl CoA desaturase	1				1
	Cold	U4/U6 small nuclear ribonucleo PRP31		2					1
	Cold	UDP N acetylglucosamine 1 carboxyvinyltransferase		3
	Cold	Vacuolar CLN3		1
	Cold	Very long chain acyl CoA dehydrogenase		4
	Endoplasmic reticulum	Ankyrin repeat containing	1	9	2	1	1	4	3
	Endoplasmic reticulum	Autophagy related	1	5	2		1		1
	Endoplasmic reticulum	Bax inhibitor 1		2
	Endoplasmic reticulum	Carbon catabolite derepressing ser/thr kinase	1			1			1
	Envelope	RNA polymerase sigma factor SigB		1
	Environmental	Cytochrome P450		1
	Environmental	eukaryotic translation initiation factor 3		4
	Environmental	Phospholipase D1		2		1
	Environmental	Short chain dehydrogenase		4		2		8	6
	Environmental-Oxidative	Peptidylprolyl isomerase		1				2	2
	General	1 phosphatidylinositol 4,5 bisphosphate phosphodiesterase			1
	General	26S proteasome non ATPase regulatory subunit		2
	General	30S ribosomal S1			2	1			1	1
	General	5'/3' nucleotidase SurE		1				2	1
	General	50S ribosomal L25		4		3
	General	Activator of Hsp90 ATPase					1
	General	Acyl CoA synthetase						2
	General	AGC/AKT kinase		2					2
	General	Aldo/keto reductase	3	2	3	4	1	1		1
	General	Amidase		6					1
	General	Ankyrin repeat containing		1	2
	General	Aryl alcohol dehydrogenase		4	1	1		1	1	1
	General	ATP dependent RNA helicase DBP5		2
	General	ATP dependent RNA helicase DHH1		2
	General	Autophagy related		17	1			3	2
	General	Bax inhibitor 1			1				1
	General	Cell division control		1
	General	Chaperonin 10			4
	General	Cpn60/TCP 1			1
	General	csbD			2	1
	General	Cytochrome P450					1	1
	General	DExD/H box ATP dependent RNA helicase dhh1		1
	General	Diacylglycerol O acyltransferase					1	1	1
	General	Dihydroxyacetone kinase	1	2	3	2		2	2
	General	DNA binding HSP70/DnaK family ATPase						1
	General	Dna J		3			2
	General	DnaK		5	1		2		2
	General	Dolichol phosphate mannosyltransferase		1	1
	General	eIF 2alpha kinase GCN2		2
	General	eIF2 alpha Serine/threonine kinase		1	1	1
	General	Eukaryotic translation initiation factor 2		2				1	1
	General	Eukaryotic translation initiation factor 5		3				2	2
	General	Ferritin		4	1	2		5	5
	General	Formate dehydrogenase	2
	General	Fructose bisphosphate aldolase		5	2	3
	General	Galactosyltransferase			1
	General	General stress 20U		2			1
	General	Glucose 1 dehydrogenase			1	1
	General	Glycosyl transferase		3	6	2		1	1	3
	General	GroEL	2		3	3
	General	Growth regulation			2
	General	GrpE				2			1
	General	Heat shock 33		2
	General	Heat shock 76		1
	General	Hsp 70 domain containing		2
	General	Hsp 90		3		1	4			1
	General	HSP20 chaperone		2
	General	Hsp60			2
	General	HSP70 mitochondrial		2
	General	Hsp90 co chaperone		4
	General	Kinase sch9					1
	General	Lon protease , mitochondrial		1				1	1
	General	Lon protease 2, peroxisomal			1			1
	General	Lon protease C terminal proteolytic		1	2
	General	Lumenal Hsp70	1
	General	Metacaspase		3
	General	Molecular chaperone		2
	General	Molecular chaperone Prefoldin			2
	General	Na(+)/H(+) antiporter		1
	General	Phosphatidylinositol 4 kinase						1	1
	General	Phosphatidylinositol 45 bisphosphate bindingSLM1		2
	General	Phosphatidylinositol kinase					1
	General	Plasma membrane heat shock		2
	General	Related to stress response rds1p	1	1			1	1
	General	Repressor of RNA polymerase III transcription MAF1			1
	General	Ribonuclease T2		3
	General	Ribonuclease T3		1
	General	Ribonuclease T4		1
	General	Ribonuclease T5		1
	General	Ribonuclease T6		1
	General	RNA helicase		2	1		1
	General	Short chain dehydrogenase/reductase	2	2	1		1	5	2
	General	Stress induced phospho		2					1	1
	General	SYM1	1	2						1
	General	Tetratricopeptide repeat containing				2
	General	Thiamine thiazole synthase 2		3
	General	Thioredoxin reductase		1
	General	tRNA:m(4)X modification enzyme TRM13				1	1
	General	Ubiquitin modifier activating enzyme ATG7			1
	General	Ubiquitin modifier activating enzyme ATG8			1
	General	UBX domain containing 1		1
	General	Universal stress		1		3		1	1
	General	Zuotin and related molecular chaperones		2
	Granule	Ras GTPase activating		4
	Heat	10 kDa heat shock mitochondrial		3				1
	Heat	ATPase family AAA domain containing		1				1
	Heat	Calnexin		2				1
	Heat	Casein kinase II beta 2 subunit		1
	Heat	Chaperonin 10			7		1	3	4
	Heat	Dna J	1	4	2	1		2
	Heat	DnaK				1				1
	Heat	GroEL	1		4				1	1
	Heat	GroES	1		2		3
	Heat	GrpE	1		2	1	3
	Heat	Heat shock		1		3
	Heat	Heat shock 70	1
	Heat	Heat shock 71	1
	Heat	Heat shock 72			1
	Heat	Heat shock 73			1
	Heat	Heat shock 74				1
	Heat	Heat shock 75				1
	Heat	Heat shock 78 mitochondrial			3
	Heat	Heat shock 9/12		3	1				1
	Heat	Heat shock 90	2		1			1
	Heat	Heat shock HSP 90			2					1
	Heat	Heat shock HSS1		1						1
	Heat	Heat shock of HSP70		2		1				1
	Heat	Heat shock SSA		4
	Heat	Hsp 70			3
	Heat	Hsp 70 nucleotide exchange factor FES1		1				1	2
	Heat	Hsp 71	4	2	1	2	10	7	6	1
	Heat	Hsp70	1		6		1
	Heat	Hsp70 Hsp90 organizing 1			1
	Heat	Profilin, normal timing actin polymerization		2
	Heat	Sphingolipid long chain base responsive PIL1			2			1	1
	Heat-Osmotic	12 kDa heat shock		1
	Heat-Osmotic	3 hydroxyisobutyryl CoA hydrolase		1
	Heat-Osmotic	Chaperone	1	2
	Heat-Osmotic	Cold shock cspLB		1
	Heat-Osmotic	DNA directed RNA polymerase I	1	1	1			2	1
	Heat-Osmotic	Dna J	1	1		1				1
	Heat-Osmotic	DnaK							3
	Heat-Osmotic	GrpE		4	2
	Heat-Osmotic	Heat shock		1		3				1
	Heat-Osmotic	Hsp70 ATPase ssc1		2
	Heat-Osmotic	Mmega 6 fatty acid desaturase							1
	Heat-Osmotic	Molecular chaperone		3
	Heat-Osmotic	Phosphoenolpyruvate carboxykinase		3		1
	Heat-Osmotic	Squalene/phytoene synthase		1
	Nitrosative	Nitrile reductase			2
	Osmotic	3'(2'),5' bisphosphate nucleotidase		3	1
	Osmotic	Alpha,alpha trehalase	1
	Osmotic	Alpha,alpha trehalose phosphate synthase	2	1		3	1	1	1
	Osmotic	Aquaporin		9	1		2	2	2
	Osmotic	Arrestin related trafficking adapter					1
	Osmotic	Auxin efflux carrier		2				1
	Osmotic	bck1 like resistance to osmotic shock							1
	Osmotic	Ca transporting P type ATPase		2				1	1
	Osmotic	DASH complex subunit	1	7	1
	Osmotic	Elongator complex3		4
	Osmotic	Galactinol synthase								1
	Osmotic	Glycerol uptake						1	1
	Osmotic	Glycine betaine transporter	1		1			1
	Osmotic	GrpE		3	1
	Osmotic	High osmolarity signaling SHO1		1				1	1
	Osmotic	Mediator of RNA polymerase II transcription subunit 16		2
	Osmotic	Mitogen activated kinase		4		2
	Osmotic	Monovalent cation:H+ antiporter		3	2
	Osmotic	Na(+)/H(+) antiporter		2		1				1
	Osmotic	Neutral trehalase				2
	Osmotic	Non essential component Na+/H+ antiporter				1
	Osmotic	Nucleosome assembly 1				1		1	1
	Osmotic	OsmC family			1
	Osmotic	Osmotic growth		2	1				1
	Osmotic	Pentafunctional AROM polypeptide	4	2		3		1
	Osmotic	Peptidase C19					2
	Osmotic	Sarcosine oxidase		1
	Osmotic	Serine/threonine kinase STE20				2
	Osmotic	SHO1 osmosensor							1	1
	Osmotic	Sodium hydrogen antiporter							2
	Osmotic	Ste20		1
	Osmotic	Ste21			1
	Osmotic	SterilitySte20				1
	Osmotic	Suppressor of Sensor Kinase (SLN1)		1
	Osmotic	Transcription initiation factor TFIID subunit 10			1
	Osmotic	Transcription initiation factor TFIID subunit 11							1
	Osmotic	Transcriptional adapter		2				1	1
	Osmotic	Trehalose 6 P phosphatase		2	1
	Osmotic	Trehalose phosphatase						1
	Osmotic	tRNA:m(4)X modification enzyme TRM13						2
	Osmotic	Ubiquitin carboxyl terminal hydrolase 4					1	1
	Osmotic	Vacuolar acid trehalase		2
	Oxidative	6 phosphogluconate decarboxylating				2
	Oxidative	6 phosphogluconate dehydrogenase, decarboxylating II	1	3	2		1			1
	Oxidative	Aconitate hydratase, mitochondrial		2		2	2		6
	Oxidative	Adenylate kinase	1		1		1		1
	Oxidative	Alkyl hydroperoxide reductase C	1		1	1
	Oxidative	Carbonic anhydrase	1	3				1	1
	Oxidative	Carboxypeptidase C	1				1
	Oxidative	Catalase	4	7	1	8	3
	Oxidative	Cell growth regulating nucleolar		2
	Oxidative	Citrate/oxoglutarate carrier							1
	Oxidative	Copper chaperone			1	1		4	3
	Oxidative	Copper radical oxidase				1
	Oxidative	Cu/Zn SOD						1	1
	Oxidative	Cullin		4
	Oxidative	Cysteine desulfurase	1	3	3			1
	Oxidative	Cytochrome P450		4	8		1	2	3
	Oxidative	Dihydrolipoyl dehydrogenase	1			2		3	2
	Oxidative	DNA repair RAD51				2
	Oxidative	E3 ubiquitin ligase		5	2			3
	Oxidative	Free methionine R sulfoxide reductase								1
	Oxidative	Glutamate cysteine ligase				1
	Oxidative	Glutaredoxin	1				1
	Oxidative	Glutathione disulfide reductase		3	3		1
	Oxidative	Glutathione independent methylglyoxalase			1
	Oxidative	Glutathione peroxidase	3	4
	Oxidative	Glutathione reductase		1	1	1	1
	Oxidative	Glutathione S transferase	3	13	3		4	5	5
	Oxidative	Glyceraldehyde 3 phosphate dehydrogenase		1		5	3	3	5
	Oxidative	Glyoxalase	1		1
	Oxidative	glyoxalase domain domain containing				1				1
	Oxidative	Glyoxalase/bleomycin resistance/dioxygenase			1			1	1
	Oxidative	Grx4 family monothiol glutaredoxin						1
	Oxidative	Involved in oxidative stress		2
	Oxidative	Kelch repeat containing		5	1
	Oxidative	Manganese superoxide dismutase	1				2		1
	Oxidative	Methionine R sulfoxide reductase	1	1
	Oxidative	Mn superoxide dismutase							1	1
	Oxidative	Monoglyceride lipase	1	1		2				1
	Oxidative	Monothiol glutaredoxin grx4				2
	Oxidative	Multicopper oxidase		4		4
	Oxidative	NADPH dehydrogenase 2				2
	Oxidative	Nicotinate phosphoribosyltransferase		8
	Oxidative	Nucleoside diphosphate kinase				2
	Oxidative	Obg ATPase		2		1
	Oxidative	Ornithine aminotransferase		2
	Oxidative	Oxidative stress survival		2	4
	Oxidative	Peptide methionine (S) S oxide reductase		1			1	1
	Oxidative	Peroxiredoxin		5				3
	Oxidative	Peroxisomal catalase		5
	Oxidative	Phosphatidylinositol transferCSR1		2
	Oxidative	Related to Glutathione S transferase II		1
	Oxidative	Related to glyoxalase family		1
	Oxidative	Ribulose phosphate 3 epimerase			1
	Oxidative	SNF2 N terminal domain containing	3		9	1				1
	Oxidative	SNF2 related helicase					2
	Oxidative	Superoxide dismutase	1	2	1			1	1
	Oxidative	Thioredoxin	3	9	10	4	1	4	2	1
	Oxidative	Thioredoxin disulfide reductase	2	1			1
	Oxidative	Thioredoxin peroxidase		3	1	1			1	1
	Oxidative	Thioredoxin reductase		2
	Oxidative	Thioredoxin Y				2
	Oxidative	Zinc metalloprotease	2	2			3
	Oxidative	Zinc regulated transporter		2
	Oxidative	Zinc transporter	1	2
	Starvation	GTPase ObgE						1
	UV radiaiton	DNA photolyase				2
	UV radiaiton	FAD binding domain of DNA photolyase		1
	Number of CDS predicted in each stress category (according to UniProtKB, https://www.uniprot.org/). Only were considered the CDS having similar molecular weight (ratio 0.7 to 1.3), and identity and coverage of at least 35 % and 30%, respectively, respect to their orthologous at NCBI.
