# Supplementary material for: Identification of Stress-Related Genes and a Comparative Analysis of the Amino Acid Compositions of Translated Coding Sequences Based on Draft Genome Sequences of Antarctic Yeasts
Source: Front Microbiol. 2021 Feb 5;12:623171. doi: 10.3389/fmicb.2021.623171 (PMC7902016; doi:10.3389/fmicb.2021.623171)
Supplement: Supplementary Table 5 — Average of differences in parameters for CDS groups between groups of yeasts having different temperatures for growth. Only the results with significant differences are shown (ANOVA-Tukey, p < 0.05). [file Table_5.XLSX]

## Sheet: TableNCBI
Table S5. Average of differences in parameters for CDS groups between groups of yeasts having different temperatures for growth. Only the results with significant differences are shown (ANOVA-Tukey, p < 0.05).
Parameter	T1	T2	AARE	CAPR	CEME	CHFC	CYPR	CYTO	DRPR	DRRP	ENRE	ENZY	EXOS	EXTR	GLYC	GOAP	LIBP	LYVA	MERB	METR	MIBI	MITO	NUCL	PEPT	PERO	PPAP	PREN	PRKI	PROT	RIBI	RIBO	SPLI	TLFA	TNFA	TRBI	TRMA	UBSY
			Parameter 2-1
Tln	10	17									1.46589	0.667418
Tln	10	20										0.515478
Tln	10	23						1.4804			-0.802884			-0.555033		-0.808993		-1.00308							0.560134
Tln	10	24			-0.24142			1.11959			0.167151			1.04271		0.978242		-0.980086				0.00566943	1.51817		0.927577
Tln	10	25			0.354112			-0.689949			0.0806281	-1.32405		1.20819		-0.790331		0.721488				0.917232	1.02574		-0.0990352
Tln	10	26			-0.658012			-0.668659			-0.887812	-0.268565		-0.802171		-0.575516		-0.57039				-0.888596	-1.6612		-0.722019
Tln	10	27			-0.970289			-0.460345			-0.86304			1.01927		0.817341		-1.09484				0.250679	-1.02002		-0.724315
Tln	10	28						0.800821			-1.13315	0.900669		-1.13157		-0.94826		-0.753706				-1.13388	-0.501168
Tln	10	29						-0.409842
Tln	10	30			0.08185			-0.843986			0.344932	1.12279		-0.1801		-0.424704		-0.39426				-0.313701	-0.755979		-0.558152										2.06886	2.46864	2.98676
Tln	10	32			-0.534065		2.74041	-0.592989			-0.523383			0.764		-0.667015		-0.521475		1.74919		-0.555412	-0.659323		-0.522807											2.31002	3.20761
Tln	10	34						0.902941			-0.758022			-0.624011		-0.651517		-0.356395				0.664722			0.964413
Tln	10	35										1.19163		0.780496		-0.30795						0.819428	1.746
Tln	10	37									0.869218	1.0572				0.918505						0.925684	0.901213		0.787399										2.22583	2.89497
Tln	15	10									-2.06146
Tln	15	17										0.819255						-12.452
Tln	15	20									-1.88926												-1.08241
Tln	15	23														2.25361
Tln	15	24												2.19443								-2.4728
Tln	15	25			2.1741						2.34864	0.412693		2.3609		2.13396		2.3831				2.56842	2.02452		2.34697
Tln	15	26										0.323959				-2.28426
Tln	15	27																					-3.32281		-0.777382
Tln	15	28			-0.317916						-0.504927	1.29785		-0.632403		-1.15551		-1.38174	2.79322			-0.608283	0.951548		1.22435
Tln	15	30			1.04015						0.690165	1.44879		0.431257		-0.156498		0.430613	3.0671			0.822867	0.213503		-0.657209											4.52872
Tln	15	32			-0.948582						0.423307			1.46403		1.82864		-1.17757	2.81162			1.06853	-0.868903		-0.772287											3.59852
Tln	15	34			0.558645						1.83228			0.966227		0.796221		0.763579				1.09464	1.08543		-0.348954
Tln	15	35			-0.872837						-0.178854	1.51792		0.17943		-0.460533		0.152885				-0.817876	-0.672221		-0.516077
Tln	15	37			-0.733898						-0.561493	1.47496		-0.536569		-0.509707		-0.828985				-0.694693	-0.455242		-0.523924											4.82066
Tln	16	10						8.15338
Tln	16	23						1.60283
Tln	16	29						0.860037
Tln	16	30						1.34558
Tln	16	31						-0.839139
Tln	16	32						-0.774256
Tln	16	35						1.10961
Tln	17	10			1.33229			-1.21278			-1.44877			1.52318		1.31659		0.0141233				1.79516	2.08302
Tln	17	15										-0.787829
Tln	17	17										0.378374										1.96462
Tln	17	18												-16.9382
Tln	17	20										0.900213											2.63836		-3.65085											-12.6136
Tln	17	22			-1.095							-0.742731						-1.74139
Tln	17	23						1.47026			1.31697	-0.692197		1.80639								-1.63305	0.894435
Tln	17	24			1.43396			1.7274	-2.20914	0.662549	-0.975143			1.07467		1.31514		-1.30589			-1.71762	1.14845	1.877		-0.817096	-1.8931
Tln	17	25			-0.463515			-2.31145	-2.82891	-2.84372	-0.714351	-1.01486		-1.99301		1.60701		0.285341				-0.489545	-1.17847	-1.92778		-2.20525		-1.5494
Tln	17	26			2.23108							-0.777606										-2.02637		-2.0325							-12.629
Tln	17	27					2.18057	-2.17779	-1.91756			-0.827889									-1.63903		-2.05869	-1.78438	2.09486							-2.40214			-1.37784
Tln	17	28					2.33056					0.9423	2.03116										2.83944													2.26996
Tln	17	29						0.638776
Tln	17	30			-0.531481	2.71436	2.47174	0.908699	-2.36998		-0.421527	0.338086		-1.40225		-1.42258		-0.0112533	-1.61853			0.719464	0.595895	-1.7933	0.828711	-1.64376						0.692509			0.731072	2.68678	2.29698
Tln	17	31						1.30863
Tln	17	32		2.55678	1.09411		2.8016	-0.799353		1.55989	0.243403		2.03785	-0.171156		0.416738		0.740281		0.126636	-1.51375	-0.174962	0.0256702	-1.67688	-0.871342	-1.40596		-1.63372				-2.28766				2.68152	2.04946
Tln	17	34			-0.884263			1.10124			0.561844	-0.564676		1.32047		-0.915216		-1.01525				0.505383	-0.302304		0.208376
Tln	17	35			-1.03781			0.585184		2.49832	-0.918981	-0.0946322		-1.00076		-0.141602		-0.881145	-1.60921	-1.24648	-1.47968	-0.940827	-0.399127	-1.99005	0.0852208	-1.9292						-2.71386					-2.44146
Tln	17	37		2.68983	-0.273792			-0.966669		2.46564	0.101464	0.938997	2.57782	-0.570973		-0.1835		-0.243591				-0.406061	-0.731449	-2.98216	-0.720768										2.07905	2.68469
Tln	18	10									-1.54582			-1.67973		1.6855		-1.65886				-1.39736
Tln	18	17										0.803755		-17.2736
Tln	18	20										0.668542						-7.85276
Tln	18	23									-1.63039							1.84398
Tln	18	24									1.44071			1.30392		0.106707		-1.61523				-1.6865	1.37079		1.38835
Tln	18	25			1.34217						0.903627	-0.379172		1.63123		1.52267		1.96227				1.1635	1.88361		-1.35088
Tln	18	26			-0.533922						-1.15854	0.166619		-1.56811		1.5731		0.364263				-1.31395
Tln	18	27																-2.1577				-2.20136
Tln	18	28										1.20332								1.51646		2.4772
Tln	18	30					2.54055		3.00258		-2.7967	1.3463		2.16058	3.73598							-2.27496	-3.30896		-0.1187
Tln	18	32		1.87933	0.186187		2.95236			1.61307	0.725361			-0.358881	3.91376	-0.299932		-0.28725		1.85949	2.05801	-0.170492	0.92398		-0.49657					2.15109
Tln	18	34			-0.744028						-0.892838			-1.04147		0.886845		-0.785497				-0.910569	-0.967798		-0.737481
Tln	18	35			-0.291564						-0.115817	1.49428		1.33019		0.869859		-1.27185				-0.331397	-0.814148		-0.867089
Tln	18	37		1.73708	1.05847					1.61848	1.4903	1.3967		0.818278		1.05291		1.12845		1.58404		1.21869	0.932722		-0.944239
Tln	19	25						1.59344
Tln	20	10												2.79945				2.15989				2.24315														12.5416
Tln	20	15									-1.58469	-0.731079						0.42432				1.58518	-0.912548													11.9574
Tln	20	17										0.4766																								12.7461
Tln	20	18										-0.687261						-7.48394					-6.74258
Tln	20	20			-1.10415							0.596338						-2.1779																		-1.30056
Tln	20	22										-0.691589
Tln	20	23										-0.706135						2.98676				3.29003														12.4753
Tln	20	24	-2.04327	-1.37692						-1.22943		-18.9288									-1.5843	1.25206	-1.49525		-0.663124	-1.3874										12.4547
Tln	20	25	-2.4056		0.375177			-1.25388		-2.93344	-1.03702	-1.29408		0.719218		1.37999		0.0878264				1.32185	-0.217092	-1.68605	-1.17427	-1.72488		-1.41825								12.9684
Tln	20	26						1.45946			1.47012	-0.547475		1.42438		-1.18465		-1.50841		-1.4773		-1.58392	0.459236	-1.79077	1.58915						-12.9973					12.3357
Tln	20	27						-0.571283		0.8023	-1.55525	-0.842345						-0.80112			-1.60332	1.04237	1.41597	-1.5658	-1.52385											12.4797
Tln	20	28		1.35876	-1.19193	2.08317					-1.16617	0.972053		-1.77702		1.46742		1.19354	1.41225											1.31525		1.72781				6.95346
Tln	20	30				2.29534	2.11511		2.89306		2.13525	0.727932		2.3242	2.28414	2.23708		2.27768	1.10727			2.45299		-1.67321	0.601346	1.90542						4.75095	2.57044		1.77455	9.23806	1.64479
Tln	20	32		1.09752			2.66999	0.326099		0.785451			1.47068		2.46192				1.44903	1.47287	1.41432	-2.12085	0.702395	-1.52902	-0.290524			-1.50257		2.14473						8.41105	2.05093
Tln	20	34			-0.053814			1.25707			0.138596	-0.507926		-0.650445		-0.498645		-0.85802	-1.18698	-0.86972		-0.239047	0.319657		0.395148											12.1817
Tln	20	35		1.74544	0.953877			-0.543308		1.67369	0.611611	0.376765		-0.613978		0.280751		0.504195			-1.44191	0.912568	0.783817	-1.84219	-0.75692											12.8475	-2.33682
Tln	20	37		1.78776	-0.528833			-0.750447		1.6282	-0.761128	1.12327		1.01973		0.07751		-1.09592		1.45264		0.325784	-0.706872	-2.86002	-0.944009			1.95658		1.74872					2.15784	6.86809
Tln	21	25						-1.03359
Tln	21	26						-1.3796
Tln	21	27						0.206464
Tln	21	34						0.822745
Tln	21	35						1.0188
Tln	22	10																					0.872237		0.856582
Tln	22	15			1.26026											1.26401							8.13608
Tln	22	17										0.964609				1.26157						1.48026	-1.75687		2.17315
Tln	22	18									2.94335							3.74812				1.67699			-1.18155
Tln	22	20										0.923548																								-12.1707
Tln	22	23										0.543923
Tln	22	24														2.9926										3.93142
Tln	22	25					-3.06769			-3.18558	3.95679	0.441909		-3.59283				-3.27743				-3.41549	-3.4633		-3.63565									2.79767
Tln	22	26										0.428105	1.5291									1.60056				3.95397				2.68044	-7.75018
Tln	22	27			-0.981732		1.78236	-0.686734			1.44469					1.51283						1.12618	-1.9265		0.415815						1.54746
Tln	22	28									1.56756	1.12619	1.99373			-1.33742		-1.26728		1.57724	1.72457	-1.43584				3.35393				2.61692	2.11942	4.24576		2.64904		2.30022
Tln	22	30			-0.533009		2.15215				0.485269	1.41589		-2.92973		1.56764		1.28882				-0.178737	-1.39854	3.07607		3.47816						4.43863		2.45266		2.6344
Tln	22	32		1.63827			2.58017			0.243259			2.00876							1.72901	2.3535					3.57454				2.67066		4.35894		2.81593		2.51962
Tln	22	34																					0.68677		1.00655
Tln	22	35			-0.952652						-0.219866	1.00675	1.6929	-1.8052		-1.38607		0.595337				1.02886	0.259671	4.23799	1.64345						2.39431	0.876359
Tln	22	37		1.60887	1.66834			-0.577925		1.41759	0.769308	1.26146	2.54038	-1.0243		0.36234		0.903771		1.63526		0.279078	1.28794		-0.299154	3.03331				2.27535						3.23413
Tln	23	10			0.626694			0.960093			0.538298			-1.67095		-1.36113		-0.476583				-1.05238	0.957829		0.904071
Tln	23	15			-1.30427							-0.658436		-2.45141
Tln	23	16						1.27003
Tln	23	17										0.589882				-1.20469						-1.43524	1.42435
Tln	23	18														1.96376
Tln	23	20										0.873015						-3.45141																		-12.1764
Tln	23	22										-0.730228
Tln	23	23										-0.0281395
Tln	23	24							-2.13609												-1.98142
Tln	23	25							-2.57004	-2.77395		-0.37651				6.77444	-3.0617	-9.59046				-7.70729		-1.91666										-1.94133
Tln	23	26										0.19844									-1.68535			-2.02138							-12.8897
Tln	23	27										-0.762136					-2.35526				-1.70878			-1.82718
Tln	23	28						-1.52132				1.00075				2.09827					1.9063															2.67935
Tln	23	29						1.65182
Tln	23	30	3.22528		1.56308			0.413033	-2.1111		0.500622	0.550489				1.30426	-2.72634	-0.0664769			-1.85649	-1.84361	3.42958	-1.78125	-1.26365									-2.9535		2.84357
Tln	23	32		1.71562						0.985165	2.25143		1.62422							1.53775	0.402529	-2.3992		-1.75963	2.15587					2.36948						2.79718
Tln	23	34										-0.435282					-2.46925				-1.4866													-2.20608
Tln	23	35						0.750656				0.155578					-3.04367			-1.02316	-1.72294		0.947647	-2.0728	0.41159									-2.2074
Tln	23	37		1.90104	0.102354					1.67511	-0.926942	1.00989		-0.797427		0.396048		-0.849791				0.598036	-0.297267	-3.3556	-1.08186					1.87737						3.32906
Tln	24	10			-0.0613738			0.714853			0.101622			0.411608		-0.557154		-1.01062				-0.294447	0.190555		0.603459
Tln	24	15																-1.8856				-2.18769
Tln	24	17			-1.63595			1.63696			0.213312			2.52777		1.30195		4.144			1.83632	1.11236	1.20077		-1.28431
Tln	24	18			1.35732						0.0348814			-0.899189				-1.65832				-1.68567	0.488524
Tln	24	19						-1.28518
Tln	24	20									-0.00374147					3.26227					1.76008	-0.711386	1.50378		-1.16625											-12.8544
Tln	24	22																								-3.44949
Tln	24	23																																		-2.10314
Tln	24	24	-1.77865	-1.37418						-1.42064	-1.03825					0.293953		-1.97213			-1.33024	1.45431	1.35278			0.500092		-1.8321						-2.13787
Tln	24	25	-0.498362	-3.23642			-1.81277		2.09872	-2.95723				17.2875	2.28533	17.2512	-3.23368	17.3915				9.81974			-1.49635	-2.65709		-1.67625	-0.0556946				-3.92026	-1.0437
Tln	24	26			-13.3947					-2.17451						7.11666		-2.67543								2.81962									1.61511	-2.1787
Tln	24	27	1.26269	-0.608837	0.593722				1.80829	-0.665814	-3.47418			0.328059	1.40859	2.69698		2.69951			0.75065		-3.61375			-0.746553									-1.34858	-1.6156
Tln	24	28	2.84688			1.97552									2.79631				1.74367		2.17357		1.25389		-1.13863										1.87485	1.97138
Tln	24	30	2.37295		0.69654	2.07708	1.76588	1.51512	2.66593		-0.791384			-0.58945	3.08418	-1.14174		-1.53088	1.98875			-1.70045	0.231676		-3.28922	0.190399			1.90698				-0.0861138	-2.91023	1.81013	0.808118
Tln	24	31						1.52265
Tln	24	32	2.18427	1.05312	0.582263		2.1939			1.61812	-0.437795			-1.30687	2.71804	2.29332			1.79836		1.93394	-1.39242	-0.662089			1.05184		0.646599						0.716351	2.18276	1.78335
Tln	24	34		0.754878						0.756314	1.94922					2.29388					-1.55975					-1.63982								-2.45318		-1.30473
Tln	24	35	1.28483	0.625476						0.599331	-2.31378					-2.82057		-2.25826			-1.1518	1.98523	2.48674		-2.91279	-0.672941		1.88977					-2.35025	-2.40593		-1.61876
Tln	24	37		1.5986	0.209246			0.950764	2.17502	1.62353	-0.320146			-1.4237	2.30244	-1.41035		-0.65509			1.72699	0.338543	1.03613		0.472182	2.03394		2.51868							2.47824	2.89325
Tln	25	10			0.94733			-0.209586			0.648916	0.652953		-0.586819		0.070064		0.863282				0.686739	0.82588		-0.434607
Tln	25	15									1.89356	-0.991075		2.40934		2.10037		2.41738				-0.156576	2.02027		-2.80757
Tln	25	16						-2.16645
Tln	25	17			0.819486	2.21383		-1.75407	2.70169		-1.05428	1.02638		-1.25881		1.53683		0.39726				-1.18545	-1.22458					1.84148
Tln	25	18			0.705302						-1.26205	-1.20278		1.61101		1.806		-0.182673				1.58694	1.72318		-1.06123
Tln	25	19						3.15999
Tln	25	20			-0.152259			-1.27355		2.6795	-1.4044	0.566165		-0.571358		1.34732		0.252997				0.534119	0.323925		-0.0826319											-12.8463
Tln	25	21						-1.07304
Tln	25	22			-1.95249							-0.743188										2.63369				-3.41325				-3.5069
Tln	25	23			2.97568				2.44281	2.87438		0.117472		3.38936		9.18606	3.51828	-8.58895				-6.80498												2.11355
Tln	25	24	-1.812			-0.0129066	-1.59173		-2.17216	3.09328		-18.9288		-16.3025	-1.32676	17.4846	2.58314	17.2192				17.2136	-3.37919		-1.98389	0.332957	6.87052	-0.791634	-1.28472				2.09366	-1.78162
Tln	25	25	-0.629058		-0.934389	-0.276735	-0.188306	2.53757	-0.00330463	-3.04795	-0.271538	-0.40438		0.139617	0.598849	-0.869873	-1.64805	-1.77704				0.660467	1.04573		-0.12504	-1.36255	-2.05175	0.0692716	-0.581641				-1.43396	-0.740435
Tln	25	26	1.94263			-2.92868		3.51196	2.23258	3.26105		0.051868		-17.4274		16.9408	3.49469	17.5437				16.2386		1.6117	-2.29176	3.5998		1.83697	-2.18026		-12.9219		-1.11058	1.94554
Tln	25	27	1.96279		-0.816507	0.798344	0.277154		-0.115813	2.42913	3.2983	0.453588		3.36097	1.22283	5.04621	2.05738	-3.06648				-1.09661		1.52409		-0.939783	-1.72508		0.896445	-2.64708			0.934477
Tln	25	28	2.30069		-1.39181	2.31987	2.66653		2.72244			1.28867			2.77815	-3.414	2.64138		1.70719		1.81962	-3.69008		1.54703		2.44721		2.20904	2.61215	1.33575		2.51571	1.64905	2.51045	1.73948	2.30006	2.16608
Tln	25	30	2.37794		-0.595076	2.36981	2.46917	-0.116504	1.80851		-1.29683	1.09346		-0.241818	2.1559	1.33704	2.20487	0.716191	1.80831			0.716717	0.198165	1.90145	0.595402	1.7623	3.61667		0.761555			3.40699	1.27635	-2.24599	3.62411	2.69592	2.24544
Tln	25	31						0.268679
Tln	25	32	2.20579	2.93458	1.40329	2.45601	2.46265	-1.01828	2.59377	2.75307	-0.11712		1.48639	1.69542	2.54642	1.70719	2.03923	0.40035	1.72559		2.74671	0.578133	1.83608	1.79856	-0.776014	2.13195		1.38883	2.44887	2.88967		2.48052	2.46992	2.06531	2.08206	2.41789	2.68854
Tln	25	34			2.47974	0.923223	-1.19176	2.17428	-1.52975	2.5701		0.261892			1.14446		2.23143	-2.22127				-2.33047			1.97542	-1.37134		1.21446	-1.17535	-2.60875			-1.3183	-2.16648
Tln	25	35			2.05614	2.6184	-0.80236		-1.94837		2.218	0.94099		2.47248	-1.12902	2.3301	2.67495	2.4085				2.14599	0.390304	2.38125	-2.03885	-1.58466		1.78305	-1.08138				-2.48187	-2.06477
Tln	25	37		3.06762	-2.16867	2.28627	2.70886	0.738168	2.94156	2.88258		1.36164		2.28169	2.04189	0.480926		-2.70209			1.73497	-2.72563	-0.00977664		0.251447	2.43017	2.34871	2.64251		1.76922					2.40312	3.36621
Tln	26	10			-0.797463			-0.949262			-0.863127	0.829761		-0.808264		0.330276		-0.790251				-0.939681	-0.831929		-0.806085
Tln	26	15										-0.315416										1.96263									12.3285
Tln	26	17			2.17258							0.838556	-1.56654									-2.55419									12.6179
Tln	26	18									-1.72322			1.27726		1.95899						-1.32175	-1.55808								12.3781
Tln	26	19						-2.06303
Tln	26	20						1.50181			1.31568	0.890137		1.71123				-1.32668				-1.54759	0.974606		1.54288						13.1381					-12.6328
Tln	26	23						2.89007				0.481785																			12.3712
Tln	26	24	-2.28742	-0.940663			-1.17753		-1.92586	-0.927731						7.3272		-7.69813			-1.11898					-1.38666		-1.54809							-1.21259
Tln	26	25	-2.64975				-1.53999	3.48357	-2.35981	-2.7388		-0.0592307		-16.1005	2.41452	16.6576	-2.90345	17.294				17.4067			-3.73298	-3.89468		-1.78513			12.7074		-3.38219	2.55842
Tln	26	26										0.206072	-1.51819							0.129303		1.21528									7.68254				0.648392	-2.052
Tln	26	27					1.84579					0.603685	-0.831592	-17.2296	1.55399									0.716139	-3.3623						9.73949				-1.10541	0.251372
Tln	26	28	2.53447			2.10958	2.10133					0.963447			2.83986			-8.04697	2.15424	1.37798	1.57086										10.782	1.81514		2.62099	1.7096	2.09955	1.77727
Tln	26	30	2.59327			2.16054	2.11647		2.39412		2.80788	1.10215		-3.26848	2.96212			-3.89307	1.67293			0.4573	1.53566	1.28236		2.08987					13.32	2.81422	0.376097	2.4246	1.20525	1.76225	2.02902
Tln	26	31						-1.46553
Tln	26	32		1.49666	-1.06126		2.5445	1.45187		1.40458	-1.10559		1.84332	1.4637	2.93636			-1.41061	2.12519	1.66372	2.06478	-1.57149	0.310415	1.71172	0.967158	3.05157				1.94843		1.7065		2.81156	1.61072	2.4406	2.44018
Tln	26	34			-1.10106						-0.102625	0.115548		-1.40677		1.31089				-0.802049										-0.81712	8.95117				-1.23048	-1.31386
Tln	26	35										0.566924							2.19437		-0.894153	-2.37089		2.48597		-1.79682					8.39837		-1.81218		-0.403153	-1.13311
Tln	26	37		1.61683						1.38356		1.15078	3.2645		2.10319				1.90351	1.3724	1.63831			-3.34061		2.09724				1.4491	12.8756				2.3979	2.71414
Tln	27	10			-0.738089		-2.10575	-0.829665			-0.161158			1.04753		-0.969734		-0.881521				0.499814	-0.495926		0.577964
Tln	27	15										-1.02742		2.21738									0.294369		0.570439
Tln	27	17										0.559445									1.71147			1.61596
Tln	27	18					-2.09015					-0.95419										-2.44719	2.06757
Tln	27	20			0.970298		-2.24317	-1.3915			-1.18963	0.92018		1.29817		1.77708		0.640789			1.80434	5.91192	1.11764		-1.60006											-12.3745
Tln	27	22										-1.07107				1.31798		-1.19834				1.93369	0.314176
Tln	27	23						-1.43193				-1.02054									1.53692	0.659446		1.41546	-1.01498
Tln	27	24	-1.58956	-0.920291	4.0771		-1.94995		-1.49548	-0.878167	-0.235258				-1.80235	2.77519		-3.52481			0.884505					-1.17965			-1.52967				-1.39243		-1.02365	0.901742
Tln	27	25	-2.14965		-5.13887	0.135486	-1.9599		0.376507	-2.80017		-0.69224		6.64946	-1.20765	6.18099	-3.00268	0.548734				-2.76897	-6.65849			-0.969747			-1.43148				-2.11302
Tln	27	26					-1.97392					-0.235664	0.925141	-17.0154	-2.27008						1.4113			1.57517	13.1301					1.79736	-9.03436		-2.6135		1.46534	1.40565
Tln	27	27		-0.664123	0.955915		-1.40352		0.487014	-0.727035	-0.748686	-1.1006	0.595139		-0.994821		-1.27139	-0.921369			0.629203	1.36095	-1.7883	0.505303		-0.480705	1.36735			-0.259188	0.418823		-1.5501		-0.841403	-0.243476	0.00647179
Tln	27	28	2.08457			1.97423	-1.36151		2.2513			1.32886	1.28478	-17.1597		18.1368				1.9283	1.73585			1.33639		1.62092				1.0811	2.0495	2.02959			1.41213	2.16167	1.8595
Tln	27	30	2.14337		4.23231	2.19408	-1.59683		2.61919		-1.31899	0.916795			-1.20465	-0.302971	-1.49063	-0.358903				-3.45503	-4.0046	1.06499		1.85803	4.35446		-0.400036			2.99623	-0.593108		0.744116	2.26563	1.34894
Tln	27	32	1.40554	0.488123	-1.42605	2.27479	0.404021	-1.23935	2.5231	0.456754	2.02185		1.50974	1.39847	0.238079	2.34157		-0.561388		2.14455	2.39743	1.65104	0.407969	1.76203	3.38055	1.90155				1.8861		2.28764			1.35235	2.52021	2.28529
Tln	27	34			1.42621		-1.69982	1.61857	-0.936875	-0.521083		-0.804268	0.42794	1.48104		1.69473	-1.38538	2.6215			-0.0132832	-0.795749	1.52405	0.0557311	-1.19087					-0.9691	-0.448822		-1.3128		-1.04311	-1.09273	-0.71384
Tln	27	35		-0.545334	0.643607	2.77959	-1.74574	-2.25124	-1.16892	-0.678067	-1.25446	0.865507	1.13566	-2.36043	-1.31798	0.381801					-0.00919994	-1.58704	-2.04494	0.785919		-1.3398					0.231388		-2.18036		-1.0021	-0.124822	-1.90609
Tln	27	37		1.25437			-1.34084		2.28215	1.22282		1.40424	2.18139							1.98631	1.7395			-0.954056		1.80886				1.51457	1.85312				1.84424	3.27756
Tln	28	10			-1.06705		-2.25574	0.755412			-1.35671	-0.890532		-1.20759		-0.918539		-0.953806				-0.725048	-0.721555		0.545155							-1.99286			-1.85383
Tln	28	15			0.772936						-0.204472	-1.00685		-1.47428		-1.29511		-0.668856				0.787404	0.664091		0.783286											-2.17505	-2.73095
Tln	28	16						0.993241
Tln	28	17										-0.557042																				-1.95285				-2.26834
Tln	28	18										-0.725184											-2.3536
Tln	28	20			8.48755						-1.68378	-0.774357		-1.72606		1.26611		0.506839	-1.84755			0.117829										-2.38686				-12.8162
Tln	28	22									1.84494			-1.35243				-1.46812				-1.41168	4.7235		-4.53083
Tln	28	23										-1.01856				1.51272				-1.64269					-1.7013											-1.98478
Tln	28	24	-2.38838	-1.45814		-2.29439	-2.51167		-2.59385	-1.48698					-2.76984			2.65493	-1.88529		-1.6989		0.447841		-1.19416	-2.30443		-1.83203	-1.92369					-2.53344	-1.77073	-2.11669
Tln	28	25	-2.49113	-2.97269	3.30883	-2.5665	-2.36367	-3.30735	-2.69945	-3.08065	-1.42665	-1.2883		0.962762	-2.70508	-0.220536	-3.43893	-3.36379				-2.09341	-3.58641		-3.56461	-2.81565		-1.92914	-2.26012				-3.47565	-2.88701
Tln	28	26		-1.41211		-3.39268	-2.67747					-1.31975	-1.98282	7.22585					-1.93473	-1.90561	-1.86602										-7.36523	-2.1552			-1.58561	-2.51117	-2.72269
Tln	28	27	-1.78424	-1.33347		-1.8976	-2.24546		-2.0996	-1.24314		-1.05536	-1.28502		-2.71409			16.5265			-1.60743					-1.56395				-1.60894	-1.79333	-2.27795			-1.64945	-1.86384	-2.02516
Tln	28	28									-1.12709	-0.105588						-1.58957	0.698784						-2.62478							-2.41739				-0.940524
Tln	28	30	-2.46021			-1.16072	-1.18399		-0.678316			-0.795504		6.89954	-2.10009			-4.46069	-1.13257			-12.8667	-3.30558	-1.21767		-0.395537			-1.77464			-0.161976	1.84682	-3.43984	-1.63756	-1.47083	-1.61319
Tln	28	32					2.15931						1.18146						1.64551	-0.138289	0.343153									1.92075					-2.1975	-0.511473	-0.226743
Tln	28	34		-0.96521	-1.05548	-1.66193	-2.41632	1.77397	-1.87884		0.99197	-0.873263	-1.00854	-2.36798		-1.3345		-1.53211	-1.92704	-1.35348	-1.61605	-1.87594	1.86165		-8.023	-1.54426				-1.44731	-1.65248	-1.85392		-3.05448	-1.59294	-1.95388	-1.87199
Tln	28	35	-1.93677	-1.09461	1.39011		-2.22917	1.34609	-2.39581	-0.987418	3.49739	-0.599186	-1.08398	1.54664		1.91381		1.30208	-1.84469	-1.33879	-1.70842		1.41896		-1.74855	-2.46458					-1.76998	-2.728		-3.00723	-1.60265	-1.69052	-1.96586
Tln	28	37										-0.0250484							-1.43266			-2.3282	2.12323	-2.84026		1.76542										2.30817
Tln	29	10						1.0245
Tln	29	16						0.75316
Tln	29	17						0.805992
Tln	29	23						1.47434
Tln	29	25						-1.05472
Tln	29	35						1.26253
Tln	30	10			-0.377272		-2.47554	-0.45387			0.598872	-1.17902		0.157818		-0.0204941		0.252357				-0.100204	-0.418206		-0.355136	-1.98486						-3.68414			-2.48397	-2.25908	-1.69031
Tln	30	15			0.826553		-2.68421				0.58484	-1.49814		-0.757375		0.375752		0.741499				0.74751	0.662034		-0.555905	-2.54668						-8.12021			-2.37089	-2.77139	-2.81961
Tln	30	16						1.42246
Tln	30	17			-0.0719927			0.784086			-0.475084	0.558694		-1.37462		-1.4462		-0.695258	-1.49725			0.764172	0.433081	1.7956	1.00734	-2.19091						-5.70017			1.50033	-2.69343	-2.13052
Tln	30	18			-2.53098						-2.57717			2.1799		2.15725							0.0169339		0.679384
Tln	30	20			2.02285	-2.92208					2.27756	-0.0794977		2.28488		2.11473		2.30754	-2.0582			2.24823		1.77622	-2.35383							-4.94486				-10.6299	-2.46809
Tln	30	22			1.31258						1.26316			-2.63529				1.40173
Tln	30	23			-0.652438			1.68698	-3.57672		-0.378089	-0.678389		1.53233		2.00108		1.42411				0.728236	1.45489	0.671251	-1.27175									2.47039		-2.52463
Tln	30	24	-2.27197		-1.15148	-2.10373	-2.35815	1.7053	-2.62		0.310843			0.64982	-2.4887	-0.513739		-1.53871	-2.05852			-1.62456	-0.018557		-0.885793	-2.09342			-2.13461				-1.99991	0.394779	-2.3699	-2.1992
Tln	30	25	-2.44064		0.0233309	-2.37161	-2.2905	-0.52502	-1.38535		-1.56953	-1.06556		1.2062	-0.868085	1.92135	-2.88666	0.973941				1.52105	-0.380548		0.521026	-2.59606	-5.2562		-0.725271			-8.68845	-2.58845	0.5857	-2.76949	-2.99029
Tln	30	26	-2.17679			-3.3802	-2.49473		-1.97248		3.45804	-0.152163		2.58345		-3.49337		-3.28517	-2.10277			0.916194	0.259264	0.587349	-1.04477	-1.07728					-16.8585	-5.83908	-2.82027	2.64948	-0.643897	-2.49963	-2.83665
Tln	30	27	-1.84304		3.40772	-1.65237	-0.973076		-0.589961		0.401454	-1.08695		0.0225387	0.0449282		1.62786	-1.46078				1.12594	-3.84228	0.778606	-3.55227	-1.41158	-2.4921		0.689843			-2.67616	-0.701809		-1.83394	-1.43529	-1.15333
Tln	30	28	2.2141			2.22887	2.056		2.36359			0.985068		7.29963	2.36642			-7.89601	1.49053	1.59564	1.96563	5.56605	-12.6114	1.12235		0.920493			1.84076		1.87838	0.568057		2.70365	1.85854	1.55108	1.93828
Tln	30	30	0.0318703		0.229636	0.774058	1.08031		1.19705		-0.705268	0.511478		0.468759	-0.287291	-0.560775	0.0240277	-1.34818	-0.457911			1.12554	0.123448	0.763105	-3.06201	0.940769	2.26806		0.576847			0.351862	0.230107	-0.547939	0.783326	0.861949	0.883566
Tln	30	32	1.64184	1.67989	-5.43659	2.32382	2.56694		2.71415				1.63305	7.47643	2.44774	7.86225		-7.72568	1.65367	1.9291	2.53986	-1.70535	-6.67065	1.85895		1.86849			2.05605	2.06834		1.41639	1.76481	2.82672	1.52931	1.92596	2.06174
Tln	30	34			-0.457468	-1.08893	-1.95503		-1.56641			-1.23303			1.1245		-1.44869		-1.70476			-2.03687	0.55302	0.254301	-1.10159	-1.73536			-1.14804			-2.38076	-1.92131	-1.88407	-1.83683	-2.42695	-1.96549
Tln	30	35	-1.99557		-0.775701	1.48621	-2.07629	-1.69194	-2.83125		-2.07302	0.511719		0.588008	-1.80648	2.27828		0.603968	-2.04258			1.43893	-0.612361	1.23009	-0.552845	-2.05905			-0.748447			-2.16606	-2.42059	-1.21249	-1.17138	-1.98566	-1.69324
Tln	30	37		1.65048	2.42606	-0.585739	-1.71062		2.57011		-0.26586	0.97931		1.7837	1.75262	1.58711		1.34062	0.0184301	1.65365	1.88097	0.474676	1.41429	-1.12729	-1.12539	1.77338						-3.6491			2.18562	2.68845	0.904985
Tln	31	10						-0.874152
Tln	31	16						0.634376
Tln	31	17						1.74161
Tln	31	19						0.614294
Tln	31	24						0.955928
Tln	31	25						-1.42085
Tln	32	10			-0.823049		-2.90356	-0.849484			-0.894505			0.200912		-0.666236		-0.0996872		-1.46106		-0.823304	0.554717		-0.676144										-2.20547
Tln	32	15			-0.745406		-3.11223				-0.774286			0.871789		0.159284		-0.981318				0.700483	-0.90621		-0.637199					-2.32062					-1.91363	-2.59343	-3.25341
Tln	32	16						-1.00263
Tln	32	17			0.957616		-2.26049	-0.902242		1.35959	0.526923		-1.6122	-0.160944		-0.0575248		1.49167		-0.730172	1.5862	0.17383	1.29134	1.49546	-0.849785			1.89858								-2.6799	-2.2469
Tln	32	18			0.799301						0.398453			-0.159935		-0.570643		-0.616614				1.19868	-0.0466515		-0.782931
Tln	32	19						-0.779984
Tln	32	20						-1.09234						2.08027				2.09354	-1.81748	-1.60316	1.50996		0.586224		0.227656					-2.07048		-2.35167				-8.98286	-2.57945
Tln	32	23		-1.77811						-1.81285			-1.46693							-1.36821	-1.99299	-2.4077		1.29496						-2.21579						-2.40316
Tln	32	24	-2.04736	-1.38894	-1.27781	-2.31724	-2.7529		-2.62993	-1.01614	-1.52285			-0.787613	-2.46417	1.39445		0.333828	-1.99204		-1.46538	0.24802	-0.166934			-1.96839		-0.471077	-2.38377				-2.15555	-2.78999	-2.21881	-2.33461
Tln	32	25	-2.04105	-3.3063	2.67575	-2.28349	-2.60595	-1.90596	-2.60788	-3.21128	1.47838			0.975609	-2.26084	1.26831	-3.28645	1.93593			-3.31636	0.0151789	1.37922		0.308501	-2.17469		0.636094	-1.06164	-3.29213			-4.10015	-2.48509
Tln	32	26		-1.25148		-3.27252	-2.92275			-0.647405	0.79522		-1.38101	-1.70986		-1.19242		-1.40378	-2.02006	-1.89792	-1.79541	-1.56016	0.856711	1.45467		-2.51314		1.81641		-1.40663			-3.09612	-3.36269	-0.16688	-2.37034	-3.31504
Tln	32	27		-0.916248	0.916427	-0.823957	-2.08366	-1.5562	-1.1279	-0.870251	-1.25375		-1.22015	1.61603	-1.05549	1.88164		0.6045			-1.02844	4.84966	0.447774	0.633713		-1.10647			1.45429	-1.5477		-1.79634	-0.648565		-1.87206	-1.80527	-1.98672
Tln	32	28	1.86117	1.53874		2.44638	2.40582		1.75396	1.51146			1.53103						0.982076	0.14467	1.65883	-0.627974		1.39		1.70203		2.22722	1.84831	-0.027206		0.985708		2.4391	1.75829	0.464902	0.107656
Tln	32	30	0.642782			0.425032	0.242308		-1.32643						-0.272213			-5.36488	-0.76536				-3.50396	0.966091		0.701795			1.22186			0.229328	-0.302269	-2.38903	-0.0400978	-0.65688	-0.579482
Tln	32	32		1.73925		2.32623	2.45853		1.83977	1.74706			1.61522		2.41262				1.81054	0.742923	0.921166	1.5048		1.64153		1.92265		2.34037	2.3084	0.744723		2.35349		2.26352	0.950477	0.775223	1.19691
Tln	32	34		-0.871626		-0.253991	-2.54817		-1.96465	-0.827087			-0.407428						-1.89799	-1.666	-2.16997	-6.55625	-7.45196	0.679007		-1.82488		-0.0957373		-1.80329		-0.416524	-1.79811	-2.8789	-2.08613	-2.49355	-2.33265
Tln	32	35		-0.156236		2.24459	-2.44477		-2.71738	-0.141297			-0.473189		-1.98426				-1.74987	-1.1483	-1.85822			1.42182	-4.05512	-2.38046		2.67396				-1.78922	-2.69947	-2.83165	-1.20279	-2.18373	-2.41039
Tln	32	37		0.869125	1.70721	1.95227	-0.0450264		2.3909	1.79813	-1.12794		0.94301	1.56744				1.47732	0.0860826	-0.164872	0.503607	-1.63605	0.711865	-1.7347	1.5676	2.18046		2.74554		1.40078		1.38259			2.65451	2.27299	-0.0613011
Tln	34	10			-0.681678						-0.675938			-0.751235				-0.816872				-1.00307
Tln	34	15			0.91997						0.741144			0.826117		1.37839		1.10685				2.19816	0.86489		-0.861809
Tln	34	17			0.274393						-0.560139	0.675274				-1.09275		-0.937597				0.00701233	-0.921089		-0.35871
Tln	34	18			-0.853056						-0.541867			-0.750016		-0.662323		-0.750069				-0.974162	0.50568		-0.804378
Tln	34	20			0.930528			1.47943			-0.350277	0.523334		-0.680811		0.430838		-0.917879				0.558221	1.30571		-0.767925											-11.736
Tln	34	24														2.3696						2.2607	1.99705
Tln	34	25										-1.34657										-2.33897			2.01567
Tln	34	26									1.81571	0.093771				1.40464						1.21336								1.78229				2.37988	1.63299
Tln	34	27														1.9594		1.26789				-1.44051	1.7489
Tln	34	28										0.878145				-2.14636						-1.854	1.37839
Tln	34	30									-3.22117	1.10026													-1.20192											3.3655
Tln	34	32																		2.48535										3.00486
Tln	34	34																				1.78488
Tln	34	35										1.16911		-16.7908											13.0579
Tln	34	37										1.05526				-3.56189								-2.85145												3.39974
Tln	35	10			1.26395						0.692761	-0.046577		0.932264		0.355791						1.7193	1.53084														2.26841
Tln	35	15			-0.91267						0.270313	-1.31639		1.36382		0.052351		-0.529536				0.565773	0.272677		0.695778
Tln	35	16						1.31023
Tln	35	17			-1.18057			0.381359			-0.930574	0.278757	-1.73033	-1.1769		-1.0444		-0.966013		1.1059		-0.72006	0.271961		-0.823554			1.71301							1.51891	1.81728
Tln	35	18			-0.597586						-0.91064	-0.740765		0.925865		-0.555652		-0.899855				0.454765	-0.595203		-0.490852
Tln	35	20			0.804579			-1.01466			0.173498	0.076578		-0.567094		-0.381888		1.45867	1.45568	1.1543		0.607756	0.7027		-0.441556	1.29943										-9.87883
Tln	35	22														-1.06078				0.919991
Tln	35	23						-1.09467				-0.32677								1.26521				1.60813	0.31122									2.31317
Tln	35	24		-1.46276	-2.21834	-3.23017				-1.51623	-2.0774			-2.32512					-2.35491		-1.5738					2.20597		-1.35975					1.99385	2.55595	-1.59336	1.42012
Tln	35	25		-3.35937		-3.29521	-0.760273		1.88982	-2.915	2.04624	-0.880397		2.39655			-1.67986	2.23362				2.09961	2.16416		-2.69396	1.33904		-0.169376	1.33237				0.981487	1.54112
Tln	35	26				-3.77383				-2.20509		0.0338879	-1.68199						1.16953	0.243431		-2.20052		1.76784		2.42004		1.82919			-6.29922			2.40764	1.68839	0.0290924	2.02496
Tln	35	27		-2.01658	1.25077		2.15163	-1.59892	1.8393	-2.01746	-0.294052	-0.537595		-1.09855		1.20087	1.9598	0.982164			-0.25494		-1.61087	-0.188337		1.14551					0.78292	-1.83673	1.39396		-0.58308	0.378028	2.11126
Tln	35	28	2.4901			1.8333	2.30161		1.87545		-1.35648	0.799343	1.0295			1.40272		-1.48237	2.1138	1.7331	1.48529			1.70317		2.13161		2.04165			1.51072	2.65079		3.15725	1.90134	2.087	2.69432
Tln	35	30	2.5489		-1.2756	1.00596	1.98068		2.55499		-2.06948	0.0591647		1.77788		1.40337	2.73577	1.39049	1.06889			1.07684	-0.606745	0.292002		2.04433			1.28922			0.87023	1.99547	-0.182016	1.54505	2.04668	2.57791
Tln	35	32	2.30548	0.982425		1.46381	2.44736		1.96126	0.766049			1.3583	2.61126	2.75527			-3.5251	2.10052	1.97018	1.70323		-3.29753	1.23162		2.4016		2.23984				1.4761	2.12294	2.98167	1.88143	2.49193	3.28727
Tln	35	34										-0.322451		-16.6127					-1.96718									1.06878						-2.2735	-2.41169	-2.14486
Tln	35	35								-1.54945		0.15008							2.23588	1.09835	-1.20069	1.95189		2.53739		1.04145		2.48839				-2.19705		0.0750105	0.0934438	1.93267	3.26593
Tln	35	37		1.6018					2.30895	1.29876		0.666039							1.94501	1.63858	1.71194			-1.51303		1.90849		2.49398							2.83068	3.00821	2.49232
Tln	37	10			0.93464			0.630858				-1.18403				0.906525						0.821152	1.03537												-2.51746	-2.79043
Tln	37	15			-0.00161958						-0.686012	-1.13313		-0.252076		-0.577597		-0.530765				-0.774596	0.661319		-0.65514										-2.42888	-3.37466
Tln	37	16						-0.851685
Tln	37	17		-1.46958	-0.84781						-0.281201	-0.853907		-0.105932		0.278785		0.10519				0.477188	0.449111		0.0641794											-3.16281
Tln	37	18			0.929431						1.25202	-1.3154		0.703323		1.07574		1.03374				1.28594	1.33465		-0.862514
Tln	37	20			-0.983102			-1.01954			-0.686232	-1.15783		0.973449		1.31956		-1.09161				0.923187	-0.359112		-0.806073			-2.26615								-8.38539
Tln	37	22										-0.780954																			-3.86739
Tln	37	23		-1.96353	0.762106			0.637467		-1.81825	0.277911	-1.11367		-0.0715613		0.728514		-0.474816		-1.7007		0.898988	0.40687	2.89093	0.691086											-2.90057
Tln	37	24		-1.79158	-0.0892969		-2.41321		-2.82981	-1.77316	-0.363154			-0.751105		-1.3284		-1.30741	-2.06404		-1.71593	1.14703	1.02591		0.958383	-2.12742		-2.71353							-2.70426	-3.07745
Tln	37	25		-3.24685	-2.51387	-2.24658	-2.34659	-0.44249	-3.21812	-3.37796	-2.24474	-1.43248		-2.87798			-3.43619	2.08818				-3.20964	0.322725		-0.542123	-2.65125	-5.94349	-3.09214							-2.80298	-3.2148
Tln	37	26		-2.11475		-2.89857				-1.91167		-1.41492	-1.79445							-2.1076	-1.78136			2.53792		-2.98016				-1.89534	-9.67652				-2.24924	-3.52546
Tln	37	27		-1.63392			-2.15089		-2.13045	-1.55426		-1.06774	-2.70905	2.11616							-1.52278	2.39404		2.26135		-1.88435				-1.60948	-4.10132				-2.52274	-2.72757
Tln	37	28										0.105302								-1.31088		-2.36694						-2.12179				3.67649				-3.23292
Tln	37	29						-1.25612
Tln	37	30			11.2634			8.32007	-2.99439		1.39155	-0.759322		-1.36799		1.31026		1.85621	-2.07422			1.15657	0.352209	-0.553666	1.24469	-1.04091						3.99796			-2.49643	-2.87447
Tln	37	31						-1.31685
Tln	37	32		-1.67976	-0.00950825			-1.32657			-2.57861			1.45291						1.26288	-1.92104	-1.24927	-1.74466	3.46902				2.17989		-1.88519		3.6413			-2.96895	-3.41429
Tln	37	34		-1.54635			-2.0591		-2.51578	-1.35979		-1.01822							-1.67631	-1.18242	-1.51108			2.27498		-2.02269		-2.00787		-1.5293					-2.60828	-2.72209
Tln	37	35		-1.50707			-2.1366		-2.53372	-1.51678		-0.592249							-1.51562	-1.3968	-1.53251			2.21538		-2.21338		0.102014				-2.04748			-2.64379	-2.56403
Tln	37	37		-1.40269								-0.0250242								-1.08954		1.35719		-1.65033				0.449046							-1.72335	-0.929863
Tn	10	10						-0.332576				-0.3164
Tn	10	15			0.72208			0.430325				0.543887										0.423415	0.439918												0.854424		1.12381
Tn	10	17			0.515907			0.297456				0.297711										0.41093	0.372412
Tn	10	20			0.519387			-0.0780999				-0.0925761										0.434781	0.444941
Tn	10	23			0.579278			0.487087				0.414292										0.505786	0.602181
Tn	10	24			0.769949		0.866319	0.399057		0.800919					0.862769			1.07929	1.23489			0.462277	0.463794			0.992561		0.867499					0.794125	1.17302	1.06391	1.02792
Tn	10	25			0.659449	0.983164	1.07737	0.416168		1.11659		0.435334		1.15346				1.04659				0.787441	0.726578			1.09526		1.25937	0.69986					1.66205
Tn	10	26			0.634154			0.476899				0.356341										0.512529	0.460217												0.738155
Tn	10	27			0.576328		0.604751	0.407854		0.603577		0.388011										0.427121	0.461362						0.667738			0.722866			0.746801	0.806061	0.973653
Tn	10	28																				0.36572
Tn	10	30			0.648417	0.647736	0.815621	0.378093				0.486764							0.735098			0.390045	0.386234			0.759144						0.825229	0.824709		0.90176	0.815969	0.753452
Tn	10	32			0.673464			0.217066												0.536977		0.541453	0.490711												0.864856
Tn	10	34			0.826614		0.693857	0.446919		0.537065		0.38984							0.681932	0.719586		0.411192	0.424119						0.696806					1.16421	0.756954	0.726496	0.861364
Tn	10	35			0.851305		0.59131			0.623712		0.374735							0.809593	0.699458		0.422559	0.436054			0.790209							0.755719	1.18011	0.840287	0.834619	0.96916
Tn	10	37			0.465169							0.266928										0.574027	0.553711												2.01	-1.32114
Tn	15	10						0.367057				0.413156
Tn	15	15						0.631095				0.601305
Tn	15	17						0.393847				0.485252
Tn	15	18						0.439248				0.447409				3.74891
Tn	15	20						0.370746			0.586109	0.4948
Tn	15	23						0.531333				0.548349										0.603107	0.583782
Tn	15	24			0.907057			0.401688			0.56909					1.78889		1.23969	1.61881			0.582826	0.585479												1.11826
Tn	15	25			0.776632	1.35711	1.56976	0.458507			0.743625	0.561335		1.35146		2.28186		1.294				1.04805	0.978806			1.51043
Tn	15	26						0.511381			0.623329	0.516359										0.610035	0.472036
Tn	15	27			0.715826			0.466211				0.518954											0.464229														1.08289
Tn	15	28						0.376968				0.507775										0.597119	0.607175
Tn	15	30			0.774654			0.34212			0.474601	0.50264				1.63383						0.632711	0.55205
Tn	15	32						0.064611
Tn	15	34			0.795643			0.481401				0.561504
Tn	15	35			0.820334			0.352841				0.546338																									1.0784
Tn	15	37										0.367854										0.474074	0.495821												1.90767
Tn	17	10			-0.601922			-0.416004				-0.326362								-0.568292		-0.527999	-0.491144												-0.861371
Tn	17	15						-0.37796			-0.687029	-0.32281										-0.532422	-0.248851														1.13967
Tn	17	17						-0.195493			-0.719583	-0.0759365	-0.566269									-0.32635	-0.30071
Tn	17	18									-0.691665	-0.391735										-0.544505	-0.513988
Tn	17	20						-0.382348			0.618663	-0.224761	-0.534616						-0.822023		-0.76869	-0.337934	-0.297338
Tn	17	22											-0.636221											-1.44897
Tn	17	23						0.189631				0.553966										0.554763	0.525796
Tn	17	24		0.644	0.132048			-0.0484077		0.581177	0.601645					1.16054		-1.10664	1.02486		0.864389	0.137391	0.228277						1.02442				0.846216		0.862249	0.728631
Tn	17	25		1.19425	0.383639	1.06586	1.20848	0.0567186		1.09361	0.154208	0.339366		1.40571		1.93544		0.93028				0.629621	0.953304			1.25482	-1.90953	0.917704	1.30903								1.32695
Tn	17	26			-0.543199			0.142178			0.267619	0.192115						-1.01194		0.0334574	-0.591646	0.085002	0.00238399	0.926854												1.05136
Tn	17	27		0.868	0.613113			0.0991607		0.673198		0.431626	0.132958								-0.492646	0.466797	0.121124	0.854018		0.854054			1.11727			0.902451					0.857203
Tn	17	28						-0.339985				-0.0417083	0.0857793								-0.557288	-0.0204925	-0.000317759	-0.035027
Tn	17	30			0.590027	0.734931		-0.260567			0.507156	0.454616				1.10554						0.519684	0.511854										0.876801				0.980048
Tn	17	32						-0.289459														0.032218	0.464347
Tn	17	34			0.611016	0.62328						0.39928	0.48037							0.530298			0.420611	0.838316					1.14634								0.877229
Tn	17	35			0.635707	0.888079						0.413968	0.612717						0.678951	0.510169		0.407066	0.446509	0.800489					1.00446			-2.01942					0.85271
Tn	17	37		-1.137				-0.189004		-1.01256		-0.0219983										0.5122	0.520511	1.10065											1.99552	-1.38741
Tn	18	10						-0.404766				0.0224791										-0.375547
Tn	18	15						0.210948				0.612663										0.463652
Tn	18	17										0.454854										0.521119
Tn	18	18										0.424781				3.55568
Tn	18	20						-0.357472			0.579833	0.263344				-3.30706			-0.752138			0.491471	0.460103
Tn	18	23										0.536112										0.596009	0.563597
Tn	18	24		0.7375	0.783782			0.138681		0.717556	0.544533			1.10225		1.49078		1.16144	1.2057		0.792334	0.564173	0.53282
Tn	18	25		1.2575	0.805586	1.39568	1.31462	0.25378		1.23423	0.667635	0.512768		1.41485		0.980496		1.10661				1.04607	0.952441			1.56416								1.7357
Tn	18	26									0.627124	0.456273						1.14321		0.865144		0.604175	0.545088
Tn	18	27			0.718897			0.18817				0.482891										0.50843	0.495291						-0.68162
Tn	18	28						-0.22286				0.486778		1.22166								0.588424	0.522158
Tn	18	30			0.816557			-0.216269			0.478396	0.472713				0.0954592						0.554249	0.526833										1.22552
Tn	18	32						-0.219273														0.504414	0.481931
Tn	18	34			0.748322							0.457087								0.756343
Tn	18	35			0.773013							0.450447	0.6523							0.736214		0.462795	0.453013
Tn	18	37		-1.036						-0.915202		0.348346										0.541809	0.506491
Tn	20	10			-0.47435			-0.293437				-0.375917										-0.475504	-0.43986
Tn	20	15						-0.19669			-0.660933	-0.00502855							0.886113			-0.467099	-0.479265														1.19222
Tn	20	17						0.237084			-0.693487	0.0826426										-0.137983	-0.516499
Tn	20	18						0.276902			-0.659173	-0.364611										-0.511855	-0.498298
Tn	20	20						-0.179165				-0.146856							-0.744566			-0.432379	-0.391118
Tn	20	22						0.180437				0.225073			2.32027				0.853011					-1.37428
Tn	20	23			0.493706			0.422701				0.353443							0.697902			0.458407	0.453422
Tn	20	24		0.673286	0.525309		0.782218	0.291038		0.636386					0.9276	1.39055		1.04185	1.05135		0.646847	0.329966	0.396768			0.912004		0.82375					0.885127		0.826709	0.831036
Tn	20	25	1.08608	1.20067	0.623336	1.00693	1.10365	0.323051	0.926946	1.11985	0.384997	0.41305		1.35825		1.69576		1.04435				1.12568	1.16429			1.12086	1.2819	1.05128					0.684834				1.17562
Tn	20	26			0.0644341	0.656043		0.402749				0.27441						1.08342	0.933185	0.675819	0.784586	0.325941	0.259958												0.740445	1.0883
Tn	20	27		0.6845	0.542093	0.734037		0.324694		0.625229		0.373699	0.508727								0.647526	0.366798	0.279121			0.860526	1.3081		-0.685473			0.949785	0.593437			0.648889	0.751215
Tn	20	28						-0.199763				0.155056										0.274803	0.279764	-0.477502									-0.905011
Tn	20	30			0.613303	0.898878	0.850158	0.0756186				0.403192				1.28723			0.760794			0.49127	0.442139				1.33516					0.612704	0.915711			0.662967	0.8676
Tn	20	32	0.606998	0.41				-0.252966		0.388017									0.316901			0.0301797	0.0142844												0.445551
Tn	20	34		0.543	0.568637	0.909119	0.734182	0.372769		0.522932		0.324697	0.440364						0.689414	0.522846	0.614269															0.521038	0.929775
Tn	20	35		0.634	0.593328	0.537102			0.733517	0.597195		0.326417	0.572711						0.786742	0.524915	0.625959							0.820763					0.846721		0.592577	0.683778	0.867395
Tn	20	37		-1.06143				0.202247		-0.958164		0.257887										0.439355	0.436988												1.7328	-1.40089
Tn	22	10						-0.397346		-0.638995		-0.454421			-2.32228				-1.09622	-0.653072		-0.487558	-0.503851									-1.16992
Tn	22	15						-0.532345			-0.774067	-0.539769							-1.15082				-0.445961
Tn	22	17						-0.177057			-0.79774	-0.416978	0.528767						-0.852987			-0.472065	-0.512509
Tn	22	18						-0.129075			-0.76898	-0.523196		-1.21554	-2.39158					-0.750035		-0.527794	-0.519013
Tn	22	20						-0.37671	-3.08046	-0.612477		-0.398125			-2.33169				-1.19166	-0.628407	-0.718679	-0.375141	-0.387128	1.47024								-1.09794	-1.17415
Tn	22	22													2.17795
Tn	22	23													-2.10201									1.51205
Tn	22	24			-0.179277		0.964665	-0.138414	-3.03667						-2.21125	1.1011		1.40119	-0.476568		0.578927	0.1749	0.130956										-1.21118
Tn	22	25			-0.226578		1.13732	-0.109771		1.00025	-0.166127	-0.175729	1.00768	0.723903	-2.18522	1.99365		1.18273				1.642	1.48288	1.41956					0.939438				-1.02905	1.6071
Tn	22	26			-0.478431						-0.498618	-0.296798	0.585883		-2.17195				-0.948197	-0.552069	-0.541635			1.45861								-1.08962	-1.16521			-0.700417
Tn	22	27			0.463078			-0.175509					0.607639		-2.18377						-0.442635			1.31871					0.758271		0.402968	-0.792358	-0.966842
Tn	22	28						-0.356213		-0.465092		-0.327237	0.672847		-2.30868				-0.914737	-0.50411	-0.507277		-0.343413	1.52001								-1.04595	-1.21655			-0.678852
Tn	22	30					0.913968	-0.250337	-2.95522			-0.30355			-2.25467				-0.804529			0.415428		1.33942					0.720057			-1.00551
Tn	22	32						-0.320371		-0.546985			0.615221		-2.37125				-0.835809	-0.557582		0.440607	0.423169	1.41927								-1.07648				-0.774193
Tn	22	34					0.792203						0.582497		-2.0566									1.40898					0.766516
Tn	22	35						-0.215481					0.714844		-2.1455									1.41299
Tn	22	37		-1.0535				-0.198776		-0.877547		-0.271128	0.57467		-2.24145				-0.949913	-0.471176				1.53958												-1.71512
Tn	23	10						-0.527276		-0.659972		-0.50258							-0.935479	-0.521011		-0.519582	-0.490646
Tn	23	15						-0.582418			-0.687359	-0.571753										-0.496831	-0.522392
Tn	23	17						-0.213215			-0.719913	-0.326182										-0.513557	-0.528581
Tn	23	18									-0.691154	-0.562456										-0.553865	-0.524955
Tn	23	20						-0.408257		-0.64584		-0.422236							-0.922062			-0.462111	-0.46356
Tn	23	22											-0.625315											-1.45777
Tn	23	24		0.544	0.524163			-0.119946		0.470724						1.2261			0.483208			-0.450156	-0.426434
Tn	23	25		1.064	0.640789			-0.108982		0.987403	-0.510639	-0.271214		1.43614		1.95362						0.15391	1.03166											1.41381
Tn	23	26									-0.445971	-0.384007						-0.885403	-0.787458	-0.420008	-0.505755	-0.410671	-0.396148
Tn	23	27			0.541957			-0.19848
Tn	23	28						-0.406286				-0.304936							-0.857931			-0.428131	-0.419844	-0.527119
Tn	23	30			0.458216			-0.289232				-0.329021				1.07104			-0.831642
Tn	23	32						-0.31792											-0.75313			-0.41244	-0.404043
Tn	23	34			0.479205															0.381526
Tn	23	35	4.54503		0.520146
Tn	23	37		-1.2325						-0.99166		-0.246483							-0.789173																	-1.52141
Tn	24	10			-0.620248			-0.398949											-0.888137			-0.463691	-0.463493					-1.24243							-0.829464
Tn	24	15			0.679271			-0.249783			-0.704392
Tn	24	17			0.473098			-0.137934			-0.736946								-0.63469				-0.461912
Tn	24	18						0.146104			-0.744863					3.35856							-0.468416
Tn	24	20			-0.00867425			-0.295061											-0.894223			-0.408904	-0.368174
Tn	24	22						0.169833							2.09387				0.786942
Tn	24	23			0.536469			0.220573														0.426596	0.401642
Tn	24	24		0.606571	0.519106	0.507082	0.572308	0.0749143		0.487735					0.773729	1.0398		1.23858	0.787906		0.494309	0.356807	0.291036			0.744031							0.925882	0.951052	0.549268	0.474074
Tn	24	25	0.608913	1.12657	0.476671	1.02508	1.03871	0.157397		1.09016	0.43814			1.40717	0.786974	1.44588	0.856889	0.969171				1.13344	1.10608			0.671535	-0.115201	-0.336445	0.744007				0.500784	1.68849
Tn	24	26			0.157776			0.093034		-0.531776	-0.463217				0.889911	-1.13982		1.33919	-0.330441		-0.595051	0.434153	0.376078												-0.206726	0.570164
Tn	24	27	-0.517859	0.5075	0.524351	0.580246	0.379433	0.152507		0.312526					0.139943	1.08223	0.5259	1.10113			-0.282972	0.338595	-0.0110105			0.295429	-0.918484		-0.0587015				-0.0449258		0.175403	-0.0104262
Tn	24	28			0.545861			-0.255862											-0.920288			0.404065	0.40309					-0.789176
Tn	24	30	-0.524845		0.477014	0.736296	0.530872	-0.108936			0.228561				0.796589	1.19057	0.829064	1.11866	0.286824			0.32663	0.0525138			0.76736	1.22625						0.946244		0.528857
Tn	24	32	0.60792		0.476042			-0.244509		-0.549032	0.484722				-1.23957	-1.09974			-0.83037			0.211243	0.0960064
Tn	24	34			0.511591	0.744584	0.409107			-0.364864					0.0878358		0.633472	1.06099	0.0894217		-0.288681	-0.307672				0.137204			0.690237				0.768405	0.942246	-0.0660161	-0.301423
Tn	24	35		0.325	0.528907	0.528779	0.30656			0.00932847					0.655412	1.0002	0.71983	1.15876	0.305619		-0.246349					0.801398							1.00367	0.958149	-0.194999	0.591515
Tn	24	37		-1.05862	0.451842	0.476692				-0.992982									-0.741831			0.395513	0.399863													-1.47658
Tn	25	10			-0.645906		-0.955938	-0.397695		-1.02338		-0.442259		-1.69551		-2.14968						-0.536821	-0.492679			-1.00919		-1.17245	-0.801293				-0.833863	-1.60902	-0.833631		-0.990758
Tn	25	15			-0.241052			-0.202674			-0.760712	-0.456034		-2.0185								-0.93506	-0.902229
Tn	25	17			-0.293846			-0.0530586		-1.1238	-0.674332	-0.290177		-1.54705		-2.11816						-0.720539	-0.772294					-0.843335	-1.04895								-0.890172
Tn	25	18			-0.724564			0.0385126			-0.719106	-0.518254		-1.60792		3.40679						-0.62914	-0.515968
Tn	25	20	0.598503	-0.701	-0.334028		-0.947796	-0.274975		-0.923454	-0.575198	-0.295403		-1.61495		-2.51404			-0.820143		-0.738703	-0.374073	-0.350848			-1.2716		-0.870104					-1.00488				-0.942718
Tn	25	22			0.60329			0.212997			0.0405643	0.426352			2.21622							0.287719	0.44264										0.936364
Tn	25	23			0.546397			0.17653		-0.98413		0.342778		-1.51611		-2.04063						0.316238	0.484613											-1.39945
Tn	25	24	-0.418985		0.411806	-0.410004	0.441756	0.0498232		-0.709253	-0.550144			-1.2339	0.545141	0.633619		0.821814	0.975983			-0.0634589	0.0545143			0.689777	0.491003	0.722495	0.536804				0.592851	0.0445368
Tn	25	25	0.822098	1.44	0.363934	0.814572	0.98322	0.120881	0.277752	1.25478	-0.0787587	0.308356		-0.0414937	0.431789	0.31754	0.998629	0.78599				0.844468	0.748701		-0.635549	0.469273	0.244422	0.544513	0.516357				0.109721	0.503987
Tn	25	26			-0.280468	-0.940319		0.0534607		-1.12338	-0.441421	0.0969877		-1.61352	-0.844582	-1.85116		-0.457015			-0.561658	-0.250585	-0.538872			-0.464034	2.1303	-0.195376	-0.508331				-0.287827	-0.63151		-0.694415	-0.665265
Tn	25	27	0.0423459		0.497303	0.546034	-0.0771281	0.0951426	-0.0181468	-1.05617	0.699815	0.20547		-1.26193	-0.467358	-1.26211	0.565773	0.935637			-0.462659	-1.00325	-0.851195			-0.0936244	0.134205		-0.194004				-0.176496				-0.577066
Tn	25	28		-0.588	0.0453172			-0.23983		-0.554849	-0.588452	-0.0605527		-0.880773	-0.574749	-2.22662			-0.611284		-0.527301	0.0919167	0.190604			-0.539484		-0.917256	-0.571609				-0.819769	-1.51528		-0.594918	-0.797136
Tn	25	30	-0.531054		0.379607	0.71253	0.507939	-0.120084	-0.214159		-0.111577	0.356287		-1.21418	0.246977	-0.562966	0.827497	0.895375				-0.472035	-0.521589			0.112351	1.11671		0.430592				0.540373	-0.565369		-0.568848	-0.586767
Tn	25	32	0.512626	-0.668	0.448088	-1.10036		-0.315895		-0.944485	-0.0873572			-1.64081	-0.880661	-2.26031						-0.32545	-0.466916					-0.727369	0.483688					-1.1735		-0.652498
Tn	25	34			0.531734	0.654021	0.159442	-0.0694403	0.260392	-0.881543	0.690031	0.403337		-1.51091		-1.85725	0.695439	0.837699				-1.92459	-4.50374			0.490963		0.393413	0.586995				0.500562	0.788937
Tn	25	35	4.25966		0.53314	0.757999	0.231099	-0.133487	0.305939		0.0417471	0.406913		-1.12439		-2.06108	0.832868	0.930776				-2.61906	-2.0524			0.605488		0.570987	0.624909				0.705836	0.852303
Tn	25	37		-1.25726	0.412981		-0.765896	-0.106992	-0.415038	-1.25469	-0.573358	-0.266084		-1.57178		-2.00945						-0.320981	-0.892225			-0.726108	-0.921918	-0.770038								-1.58859
Tn	26	10								-0.64718		-0.313646							-0.949146	-0.665001		-0.615193	-0.560785									-0.994412		-1.62019	-0.8098	-1.23248	-0.712895
Tn	26	15			0.667444						-0.650483	-0.3325				1.13235						-0.48364	-0.522929													0.802797	0.914767
Tn	26	17			0.461271						-0.683037	-0.0456513							-0.818504			-0.568101	-0.589477													-0.905315
Tn	26	18									-0.654277	-0.264051				3.48142						-0.564435	-0.542236
Tn	26	20			0.46475					-0.620663		-0.159202						0.88673	-0.83753	-0.535716		-0.448921	-0.464097														-0.779141
Tn	26	23			0.524642							0.357663										0.453753	0.418047
Tn	26	24		0.668	0.568331	-0.64772	0.483652	-0.24692		0.686048					0.856767	1.34763		1.06819	0.720464		0.480125	0.274565	0.159821			0.657504	0.940312		0.533979				0.840132	1.17104	0.674357	0.372977
Tn	26	25	1.01274	1.188	0.560057	0.450738	1.06883	-0.168107		1.1851	0.434353	0.267758		1.30105	0.862036	1.4991	0.892184	0.996822				0.913512	1.06237			0.910193	1.20734		0.750974				0.815011	1.37766			0.898165
Tn	26	26			0.462647							0.171554				1.22906		1.05172	0.108901	0.10318	0.0872009	0.0315997	-0.0308589									-0.914106		0.415603	0.693516	0.438581	0.503852
Tn	26	27		0.5085	0.513289	0.519996				0.504967	0.591055	0.111373	0.23799			1.1729		1.00642			0.123713	0.330395	-0.021345	0.407468		0.441239	0.910239		0.626832		0.40643	0.559841	0.743702		0.169698	-0.23501	0.244449
Tn	26	28		-0.447	0.534034					-0.473277		0.0378403							-0.762695	-0.412858		0.0164118	0.119674				1.06639	-0.650295				-0.87044	-0.791047			-0.598169
Tn	26	30			0.507103	0.705806					0.211043	0.233897			0.834021	1.41588	0.693379	0.924502	0.075659			0.416685	0.13505			0.56765	1.3208		0.519039			0.285392	0.689274	1.16685	0.456825	0.50665	0.509276
Tn	26	32			0.467727					-0.498268								0.88893	-0.700259	-0.563549	0.376004	-0.215632	-0.393631									-0.909733				-0.883987
Tn	26	34			0.553455	0.787156				0.264631	0.581271	0.304227	0.224169			1.04039	0.53151	0.966282	0.53391	0.501581	0.406583			0.391767		0.439368			0.6559		0.368557	0.505198	0.722434	1.74194	0.366508	0.679535	0.652322
Tn	26	35		0.348	0.534191					0.33437		0.209788	0.356516		0.717112	1.10128	0.828436	0.957181	0.637548	0.436197	0.448915			0.35394		0.601688			0.514022			0.635526	0.957695	1.23763	0.56406	0.619881	0.760117
Tn	26	37		-0.9916	0.440015					-0.883952		-0.119434							-0.80284	-0.483105		0.387915	0.369577												0.893693	-1.40591
Tn	27	10			-0.80889			-0.381858		-0.691152		-0.469342										-0.470152	-0.568407	-0.700806		-1.27461			-0.709383			-1.21468	-0.742466		-0.816865	-0.811022	-0.948984
Tn	27	15			-1.04868			0.247157			-0.75134	-0.565118										-0.418042	-0.514723			-1.34025											-0.146703
Tn	27	17			-0.754246					-0.572112	-0.736052	-0.492197										-0.498616	-0.581271	-1.07984		-1.0225			-1.15892			-1.13947					-0.895604
Tn	27	18			-0.894155						-0.712641	-0.541235										-0.49495	-0.536061			-1.2565
Tn	27	20	0.533584	-0.5965	-0.733894			-0.281354		-0.57783		-0.464686									-0.610789	-0.401692	-0.45589	-0.690086		-1.1379	-1.18338					-1.11999	-0.913479			-0.714798	-0.93569
Tn	27	22											-0.494146		2.14146									-2.10096
Tn	27	23			-0.511329																		0.428963
Tn	27	24	0.463065	0.00875	-0.329682	-0.420952	0.564993	0.103181		0.032364					0.445953	1.15029		0.928659			0.486297	0.101141	0.234733			-0.385686	-0.555951		0.138958				0.286543		0.336415	0.675662
Tn	27	25	0.685158		-0.466577	0.76722	0.874319	0.181756	0.311476	1.0295	-0.280198	-0.0983527		1.36266	0.271326	1.93941	0.761725	0.869087				0.983792	1.00272		0.732737	-0.696886	-0.957324		0.0429705			-0.81873	-0.240872
Tn	27	26		-0.3295	-0.691096					-0.47261	-0.462421	-0.378191			-0.645388			-0.860067			-0.403103	-0.327997	-0.140042	-0.493637		-0.972033	-1.28351		-0.542556			-1.02179	-0.814171		-0.0648486	0.0464114	-0.739941
Tn	27	27	0.315617	-0.268667	0.0242484	0.495255	0.33621	0.24348		-0.0941283			0.248007				0.44256				0.0565653		-0.0252468	-0.191124		-0.432206	-0.480287		-0.0576541	-0.0220927	0.191955	-0.500815	-0.23174		0.0987257	0.1253	-0.0938294
Tn	27	28		-0.45	-0.538359			-0.146742		-0.487134		-0.371846	0.422722								-0.368745	-0.345456	-0.00383862	-0.593274		-0.903441	-1.42221		-0.731754			-1.05803	-0.86551		-0.483217	-0.547545	-0.774972
Tn	27	30			-0.497238	0.640217	0.517754	-0.286447				-0.364087				1.08599	0.712001						0.407521	-0.489979	0.682774	-0.730179	-0.686246		-0.0900461			-0.881904	0.129938		0.019394	-0.197084	-0.378162
Tn	27	32	0.449245	-0.46975	-0.603536			-0.37587		-0.519657			0.309871		-1.00683							0.384132	0.0195883	-0.595823		-0.960313			-0.555154	0.177017		-1.01761	-0.572731			-0.58937	-0.598494
Tn	27	34			0.307469	0.528566	0.639139		0.265979	0.144783			0.318495				0.550132				0.234554			0.0165731		0.0716589			0.681764	0.200373	0.137697	-0.651755	0.524063		0.175493	0.406779	0.46907
Tn	27	35			0.0357502		0.536593		0.311525	0.303695		0.235788	0.317592				0.697977				0.276887			-0.228086		-0.046658			-0.117707			-0.934373	0.691433		-0.0808657	0.514901	0.556182
Tn	27	37		-0.967	-0.493253					-0.962246		-0.331664	0.310668										0.391443	-0.468128		-0.902206	-0.885758					-0.919385			-0.451039	-1.37437	-0.554645
Tn	28	10			-0.531166			-0.112857				-0.275405										-0.472349	-0.49733
Tn	28	15						0.454963			-0.693817	0.0735307											-0.433569													0.781233	1.04664
Tn	28	17						0.239349			-0.72024	0.0325433											-0.500117
Tn	28	18						0.303372			-0.693545	-0.176931				3.28002						-0.45468	-0.506621
Tn	28	20			-0.496948			-0.0125874				-0.0601573							0.557615				-0.374736
Tn	28	23						0.355202				0.326372										0.471213	0.441743
Tn	28	24		0.702667	0.30361		0.691295	0.305006		0.621482					0.914436	1.30928		0.857005	0.974483		0.660907	0.270121	0.275396			0.729727		0.881583	0.597257				0.917185		0.73701	0.672002
Tn	28	25	1.14491	1.22267	0.388068	0.832924	0.946643	0.339887		1.08916	0.309936	0.369486		1.26429	0.764494	1.54504	1.61404	0.987821				1.05483	0.896932			0.910436	-0.949531	0.905263	0.852197				0.855134	1.60884			1.03004
Tn	28	26			-0.53072	0.574862		0.335249			-0.419108	0.230937						-0.879889	0.980498	0.621249	0.573184	0.47814	0.143884	0.608697									0.853051		0.750313	0.971866	0.635724
Tn	28	27		0.5095	0.38944	0.654143	0.489159	0.310556		0.524584		0.352014	0.359994			1.04628	0.903702				0.405483	0.324738	0.176007	0.480173		0.516689	-0.935702		0.690109			0.530162	0.777623		0.562595	0.659603	0.652317
Tn	28	28			-0.356449			0.040256				0.161201										0.465224	0.0670576	0.589353
Tn	28	30			0.301272	0.839953	0.640597	0.282815				0.326158			0.558633	1.19786	1.17314		0.624771			0.0928622	0.409351	0.37315		0.6431	1.48264		0.582317			0.701257	0.835028		0.571413	0.605086	0.701777
Tn	28	32																	0.621764			-0.0308562	-0.411141
Tn	28	34		0.423	0.465775	0.921303	0.518833	0.305269		0.363162		0.324119	0.318786				1.01127		0.604383	0.52576	0.372225			0.520159		0.514819		0.576291	0.719177				0.773773		0.423305	0.580038	0.784193
Tn	28	35	4.5358	0.453	0.490466	0.455922	0.416286			0.419694		0.283182	0.451133				0.886799		0.701336	0.505632	0.414558			0.482333		0.677138		0.759946	0.824141			0.743321	0.955308		0.620858	0.583468	0.71682
Tn	28	37		-1.03025				0.228718		-0.976614		0.0639482										0.405375	0.393273	0.608923											1.67635	-1.32993
Tn	30	10			-0.598027			-0.370634				-0.407276							-0.948697	-0.529867		-0.466795	-0.481935			-0.795962			-0.650347			-0.994888			-0.806263	-0.85124	-0.831998
Tn	30	15			-0.725776			-0.227717			-0.568369	-0.488615		-1.5573					-1.21782			-0.596119	-0.573647														-0.136244
Tn	30	17			-0.76502			-0.117412			-0.59392	-0.508308		-1.4754					-0.856843			-0.549824	-0.531433	-0.810267					-1.19065			-1.2943				-0.819092	-0.903443
Tn	30	18			-0.804178			-0.20415			-0.557715	-0.523315		-1.5711				-1.17789				-0.563594	-0.548698
Tn	30	20	0.597964		-0.536211			-0.355764	-0.938938		-0.343275	-0.406701		-1.37506				-1.11811	-0.967603			-0.477305	-0.435685									-0.988245				-1.04438	-0.912766
Tn	30	22						0.21995			-0.3				1.96513			-1.28835				-0.453156	-0.462814	-1.35538
Tn	30	23			0.322386			0.269746				0.341218		-1.23051								0.384118	0.372969
Tn	30	24	0.481171		0.32846	-0.499757	0.417578	0.0494976			-0.269012			-1.38809	0.146408	1.16695		0.00769581	0.514748			0.0225682	0.120381			0.356103	-1.06088		-0.643778				0.334259	0.94033	0.398791	0.324264
Tn	30	25	0.597669		0.267496	0.827478	1.10616	0.142927	0.419	1.2397	-0.0301558	0.102707		-0.340527	-0.0159853	1.78663	0.893903	-0.143343				1.18631	1.19923			0.160607	-0.780733		-0.210422				-0.297674	1.20136			0.906105
Tn	30	26			-0.520988			0.24041			-0.300304	-0.191381		-1.36478	-0.685208	-1.06952		-0.979019	-0.48343			-0.406052	-0.43815	-0.363717		-0.650205	-0.617543		-0.541937			-0.884298	-0.667133	-0.535866	-0.0531836	0.188873	-0.647031
Tn	30	27	0.352552		0.448743	0.489399	-0.158308	0.157835	0.0114438			-0.058016		-1.43871	-0.405883	1.39158	0.481201						-0.457146	0.386473		-0.09737	-0.632119		-0.291037			-0.0757292	-0.191396		-0.121323	-0.216034	-0.210341
Tn	30	28			-0.314096			-0.329979			-0.231831	-0.305729		-1.49464	-0.645673				-0.773615			-0.00889117	-0.153909	-0.41702		-0.725655			-0.605215			-0.882164	-0.784573		-0.456195	-0.673869	-0.763787
Tn	30	30	-0.388042		0.0872324	0.690473	0.406796	-0.231865	-0.51559		-0.155375	-0.160975		-1.32637	-0.132512	0.770574	0.794953	-0.845173	-0.645659			-0.117335	-0.370114	-0.204886		-0.228115	0.841575		-0.371386			-0.609858	0.176403	-0.894979	-0.0708646	-0.449201	-0.248382
Tn	30	32	0.426606					-0.35243			-0.0411866			-1.35661	-1.04741			-1.09149	-0.736253			-0.306262	-0.317212			-0.589734			-0.47617			-0.835849				-0.770707	-0.444595
Tn	30	34			0.47139	0.63016	0.269255	0.262679	0.26476			0.299823					0.613348		0.146461					0.303403		0.380343			0.40219			-0.127643	0.347741	0.853758	0.312238	0.458607	0.462511
Tn	30	35	4.58753		0.496081		0.191218	-0.287017	0.310307		-0.30205	0.196065		-1.36151			0.814864		0.541004				-0.465069	0.292735		0.486394			-0.238452			-0.650733	0.515844	0.869661	-0.32446	0.555399	0.562929
Tn	30	37		-1.27				-0.275265		-1.11566	-0.253058	-0.304538		-1.34224					-0.750447			-0.432805	-0.431212			-0.558637	-0.975174					-0.652138			-0.461366	-1.4583	-0.383084
Tn	32	10			-0.587667		-0.624649	-0.238347		-0.661347										-0.513261		-0.486287	-0.475762												-0.921698		-0.757251
Tn	32	15			-0.591816			0.398255			-0.772412											-0.644055	-0.673468
Tn	32	17		-0.611	-0.585421			0.238104		-0.561957	-0.740142		-0.554442									-0.4698	-0.478558	-0.832154													-0.773115
Tn	32	18		-0.572	-0.633718					-0.565752	-0.723307											-0.592353	-0.554221
Tn	32	20		-0.638667	-0.534379			-0.1926	-0.72757	-0.597923			-0.514436						-0.670959	-0.488596	-0.632137	-0.485277	-0.510178							-0.553505					-0.631892		-0.825662
Tn	32	22																	0.541741
Tn	32	23						0.298494														0.386617	0.356867
Tn	32	24	-0.502454	0.272	0.414636	-0.376535	-0.339899	0.378298		0.277711					0.928171	1.23865		1.20434	0.992639		0.356146	-0.00133017	0.0121147			0.665968		0.799459					0.509978	0.941582	0.460225	0.72096
Tn	32	25	-0.31126	1.24725	0.38043	1.01211	0.969592	0.389032	-0.299991	1.22242	-0.317087			1.26155	1.0042	1.8339	0.778673	1.17164				0.471568	0.390992			0.725151		0.933693	0.453136				-0.467957	1.14868
Tn	32	26	-0.533657	-0.508	-0.568151			0.272305		-0.504552	-0.557347		-0.298241		-0.62819			-0.844498	0.476555	0.403278	-0.455093	-0.248163	-0.409799	-0.385604					-0.385685	-0.397465		-0.518058	-0.553235	-1.21581	-0.0295411	0.787913	-0.548208
Tn	32	27	-0.494084	0.241813	0.481362	0.553122	-0.569932	0.319438	-0.255313	0.221377			-0.380258		0.122448		0.441009				-0.283064	-0.329615	-0.449129	0.102018		-0.00316389			0.11466	-0.309892		0.711081	-0.00704119		-0.38157	0.344966	0.129679
Tn	32	28	-0.546037	-0.547	-0.39388		-0.449625			-0.547745	-0.441376		-0.392858						-0.47693	-0.364299	-0.420735	0.153973	0.19237	-0.513997						-0.341612			-0.665229		-0.58805	-0.463959	-0.680079
Tn	32	30	-0.616778		0.0804472	0.706429	-0.224558	0.316084	-0.270447						0.886833	1.0464	0.71045		0.280869			-0.240925	-0.355345	-0.290884		-0.016258			0.223755			0.263244	0.540563	-0.689254	-0.298994	0.509104	-0.16239
Tn	32	32	-0.693075	-0.573571						-0.567379					-0.856778					-0.378598		-0.445782	-0.452221							-0.346822		-0.513685			-0.399111	-0.521539
Tn	32	34		0.201333	0.522023	0.703439		0.288551		0.183671							0.548581		0.499582	0.481714		-0.315464		0.311173					0.438491	-0.215657				0.932776		0.603522	0.467245
Tn	32	35	-0.419962	0.355833	0.493682		-0.376443			0.332802					1.1056		0.714925		0.543382	0.461586		-0.362514	-0.425424					0.523621				0.782614	0.471572	0.948679	-0.603288	0.553309	0.615124
Tn	32	37		-0.956125			-0.434607			-0.862301			-0.390018						-0.408172	-0.331364		-0.0218069	-0.461535												0.584607	-1.31232
Tn	34	10										-0.53486
Tn	34	15									-0.85672	-0.592278
Tn	34	17									-0.880393	-0.370937
Tn	34	18									-0.851634	-0.603636
Tn	34	20				-1.19356						-0.525819
Tn	34	24				-1.07949		0.367831											0.946201
Tn	34	25			-0.426584	-0.889391		0.117824			-0.688007	-0.196062				2.43892						2.66354	4.55223						-0.73404
Tn	34	26																																-0.945657
Tn	34	27				-1.04025
Tn	34	28										-0.255818
Tn	34	30				-0.799602						-0.355698
Tn	34	32				-1.09036
Tn	34	35				-1.02382
Tn	34	37		-1.315						-1.18698		-0.252717																								-1.70629
Tn	35	10	-4.66893		-0.612665	-0.831619	-0.916004	-0.31836		-0.496344		-0.441262							-0.761548	-0.592251		-0.392475	-0.412283	-0.580193					-1.03599			-0.83186			-0.868143		-0.814116
Tn	35	15					-0.983141	0.278253			-0.741256	-0.625069																				2.20761
Tn	35	17				-0.966045	-0.6842				-0.77381	-0.489731								-0.548525				-0.95923					-1.08756			2.05477					-0.859199
Tn	35	18	-4.86908								-0.745051	-0.564608								-0.774571									-1.37159
Tn	35	20	-4.66418			-1.03984	-0.831903	-0.271066		-0.482211		-0.422554							-0.737687	-0.541073				-0.604426					-0.976999			2.06525	-1.01393		-0.791523		-0.911746
Tn	35	22	-4.4968				-1.01435								2.12611				0.654204					-1.57173					-0.870893			2.36114
Tn	35	23	-4.52159																	-0.399754									-0.736137
Tn	35	24	-4.57513	0.540667	0.536675	-0.920764	-0.203158	0.38743		0.516272					0.656222	1.17371			0.945163		0.397564		0.387675			0.583719			-0.69194				0.436747		0.270611	0.614262
Tn	35	25	-4.52792	1.212	0.339829	-0.778245	-0.27671	0.35883		1.05967	0.144326	-0.0668798		1.48495		2.49965	0.869798					2.54562	3.53006			0.711634		0.0345262	-0.689517			2.48477	-0.753814	0.205464
Tn	35	26	-4.76341			-0.807288	-0.533338					-0.242671								-0.216446	-0.356017			-0.51268					-0.757141		-0.389095	0.855986	-0.512054	-1.15327	0.765551	0.423648	-0.634292
Tn	35	27	-4.56804		0.418958	-0.624254	-0.438643	0.274576													-0.257018			0.0101695		0.865772			-0.45354		0.329449	1.84656	-0.470319		0.00633618	-0.306727	-0.546094
Tn	35	28	-4.54456	-0.377		-0.843406	-0.74098			-0.322441		-0.451342							-0.64838	-0.543988				-0.641073					-0.910093			0.245007	-0.809864			-0.453803	-0.766163
Tn	35	30	-4.59453		0.474684	-0.738404	-0.418187					-0.299898					0.801575		0.530245					-0.407746		0.429884			-0.719057			1.97337	-0.124061	-0.921008	0.215863	-0.427732	-0.520036
Tn	35	32	-4.63916	0.238		-0.870123	-0.380789			0.266013			0.222926		-1.23742					-0.499942				-0.472343					-0.860976			1.11641			-0.76157	-0.511383
Tn	35	34			0.425261	0.2236	0.44565					0.196681					0.594009			0.410145				0.400224					0.32285			2.30482			0.438544
Tn	35	35	-4.51975		0.449952	-0.795788	-0.572731					0.00825974	0.281201				0.80605		0.367577	-0.0613552				-0.521138		0.381367			-0.539754			2.17638	0.398342		-0.114218
Tn	35	37		-0.952333		-0.878186	-0.725962			-0.801714		-0.205495							-0.615242	-0.522586												1.96857			0.505465	-1.48207
Tn	37	10						-0.330112				-0.305055										-0.481359	-0.469994												-0.761784
Tn	37	15						-0.20682				-0.1509																								1.81192
Tn	37	17										-0.435528
Tn	37	18										-0.425298
Tn	37	20						-0.282818				-0.299062
Tn	37	22											-0.764604											-1.45878
Tn	37	23								1.0526		0.206711										0.365472	0.371848													1.44992
Tn	37	24		0.764	0.472859		0.676277	0.375678		0.961254					0.590244	1.16043			1.14984		0.497089	0.385555	0.442622			0.712472		0.762624							0.832527	1.17431
Tn	37	25		1.284	0.509633	1.05242	1.16041	0.337198	0.446475	1.25254		0.340877		1.29228		2.23888	0.888937	0.764996				1.39914	1.33011			0.884722	1.67273	1.02703								1.89588
Tn	37	26								0.98828		0.180787								0.519623																1.30794
Tn	37	27		0.588	0.355142		0.474141	0.262824		0.790767		0.309102					0.551273									1.05574	1.63657								0.508181	1.13339	0.592868
Tn	37	28										0.0631552										0.359484	0.395241
Tn	37	30			0.340456	0.823395	0.625579					0.302076					0.820715		0.588792			0.395076	0.380927			0.479055	1.72598								0.526439	1.43946
Tn	37	32								0.971023												-0.374664	-0.366523													1.30033
Tn	37	34		0.514	0.361445	1.23235	0.503815			0.646105		0.236427					0.658846		0.535626	0.521536																1.05174	0.389197
Tn	37	35		0.612	0.386136		0.401268			0.732753		0.244924	0.448292				0.825189		0.663286	0.514193						0.51012		0.40722							0.452225	1.01153	0.588374
Tn	37	37		-1.145						-0.390032																									-1.62194	-0.657262
Vf	10	10									-2.78745										-3.01182	-3.04566
Vf	10	15		4.25924		5.62977		2.05964		4.28948	4.87768	2.04817	3.54335						5.06101	4.04215	4.70194	3.89791		3.88016	4.03007				4.75233	5.20966	4.03669	5.15974		7.11562		4.45911
Vf	10	17										1.50683										-1.67688
Vf	10	20										1.63735										-1.07191									-3.60415
Vf	10	23		3.32945				0.463309		3.37947	2.36044											0.12697
Vf	10	24		3.04814		5.44279	5.74813	1.55993	6.49414	3.04138	2.34628	1.50723	3.40248	4.42091	6.50215			3.55506	4.97927	3.02661	1.67215	1.27117		3.68115	1.98393	5.4589	7.14021	4.59822	4.60068	4.92383	2.26871	5.77174	5.91219	7.16835	2.51537	4.70144	5.52616
Vf	10	25		4.31479		4.99211	5.93701	2.2796		4.12149	3.53961	2.00495	3.34494	4.24427	5.58091			3.85249	5.30097	3.8269	3.8097	0.645403	-18.4861	3.56031	3.00196	5.61109	7.52517	5.69153	5.15178	5.35071	4.2531	5.68739	5.42647	7.13569	3.6314	4.80883	4.72699
Vf	10	26		4.56528		4.26166		2.99955		3.83299	4.6969	2.19479	3.02299	4.30635					4.01028	3.76184	4.04927	3.23167		2.79447	3.83448					4.14149	3.3607	4.36459		7.13994	3.48554	5.12671	5.39553
Vf	10	27		4.64362		5.28759	4.86184	2.60196		4.43177	3.54256	2.11006	3.44329	3.97655	4.19749				5.57229	3.064	3.83724	3.7016		3.47252	2.75807	4.79024	7.55953	4.51713	4.24767	5.25952	4.54685	5.48082	5.93224	6.73785	4.01169	5.58743	5.84759
Vf	10	28				-5.20582		-2.50215											-5.0191	-3.65684	-4.86656		-3.01782		-3.24669					-3.71663	-3.0116	-5.04721			-4.52986	-4.16279
Vf	10	30		0.344927		0.334321	5.20876	0.679144	-6.95001	0.215196	3.57627	-0.852965	2.17161		4.90981			-3.26646	-0.205318	0.245121	-1.25644	4.10939	-3.74828		-0.14404	-0.0176794				1.25264	0.628731	-1.19916	6.15476	6.37835	-2.40738	1.26144	4.60447
Vf	10	32		-3.79207		0.378855	4.85856	0.0264377	-6.84592	-1.86663	4.32442	-2.4801							-2.53931	-1.02843	-1.53334	3.52531	-4.34655		-1.04073					-1.11975	0.220895	-1.55171		6.17936	-4.13726	-4.45682
Vf	10	34		4.30628		5.37924	5.25284	2.21289		4.23662	4.61448	2.2335	3.11495	4.09164					5.10909	3.24222	4.1482	3.83816	2.55256		3.49123	4.89136	7.52295		4.39117	5.36258	4.17016	6.26475	5.12131	6.67981	3.62061	5.28665	5.71544
Vf	10	35		3.84327		5.86656	4.63421	1.21053		3.80908	5.00346	0.451646	3.10329	3.76987					0.384537	1.19959	0.259518	3.64209	-1.25577		1.57904	5.30552	7.27157		4.26011	0.442615	4.83255	5.49611	5.15809	6.60524	1.08851	4.82976	5.65726
Vf	10	37		-4.09495				-3.17909		-4.36874	3.6995	-3.20273									-4.5291	3.65709	-3.575		-2.88261					-5.17508		-5.41672			-4.1586
Vf	15	10									-3.08884
Vf	15	15						1.65059				1.6525										3.85599
Vf	15	17																				2.46405
Vf	15	18																				2.04253
Vf	15	20																				2.01715
Vf	15	23						0.213496														3.5597
Vf	15	24		-4.75498	-3.486			-0.271398		-4.11258	0.715802	1.50574	3.46099		6.46189				5.26724	-3.08291	4.34809	2.13855			1.23663	6.07374					4.60992	-0.592056			2.40708	5.58538	4.57148
Vf	15	25	-4.62418	-5.04121	-3.68967	-6.15423	-4.91648	0.856009	-6.70106	-2.7916	1.02479	1.78284	1.3801		6.57833				4.46122	-2.42122	1.52229	-0.802068	-17.1197	3.22159	3.30091	3.80857			-5.23435	-2.13942	2.64657	-1.13059		-7.62992	-0.471503	3.25491	-4.7013
Vf	15	26		-3.66339				0.939634	-7.1286	-3.80903	2.0825	1.6941	3.41934						5.6845	-3.10182	0.247039	3.2081		5.78856	2.61583						4.53379	-6.15416				6.15068
Vf	15	27						2.45063				2.12897							5.33148		3.46155	2.37067			3.28616						4.00132					6.00317
Vf	15	28		-4.48322	-4.057			-3.19437		-4.58959										-7.25118	-4.61322				-2.9682		-9.55592								-5.18813		-5.07262
Vf	15	30		-5.13515				-1.56419		-5.02872	3.2266	-1.88296					-7.56787		5.43515	-7.34546	-4.17561	2.57116	-4.0794		-1.65385		-9.01561				4.52703			-5.18249	-5.12609	5.58749
Vf	15	32		-5.18291	-5.444	-5.40887		-2.37861	-8.05909	-5.3853	-3.78712	-3.11765	-3.61503				-8.61956		-5.98783	-7.20433	-4.18337		-3.96069		-3.44083	-5.23787	-9.2189		-5.47404	-4.59009		-8.41519		-7.33621	-4.87766	-6.41907
Vf	15	34						2.45676			3.10233	2.04128							4.86828		3.56666		3.26429		4.04453						3.97339					5.70238
Vf	15	35		-4.62193				-0.885218		-4.74924	-0.169034	-0.48233							5.27683	-6.94577			0.725425		2.33167						4.28703					5.2455
Vf	15	37		-5.86673				-3.72083		-6.16945		-2.94494					-8.0741			-7.80142			-3.20104
Vf	17	10						-1.49612			-4.19447	-1.42805	-2.85115							-3.64791	-4.79877	-2.43503			-3.39445					-4.2254	-3.6484
Vf	17	15		4.6356	4.57783	4.35786		2.06309		4.52513	3.15611	1.86717	3.00107						4.3232	3.1052	3.65275	3.64902		3.52478	3.34436	4.85252				4.12911		4.38022		6.06852		4.82699	3.81894
Vf	17	17						0.416487		0.156537	1.46734									1.02615	3.74959	0.617791	0.00802596		-0.100746											-4.43371
Vf	17	18			3.43			1.4658		3.06848	2.08584	1.31844									3.29099	1.88385	1.75637		2.43179
Vf	17	20		3.391				0.390675		3.17477	-0.0140669	1.42354		4.16986							-0.514896	-0.135809	-2.10349		-1.83034						-3.97499
Vf	17	22		4.15067	3.6695		22.9995	2.13204		4.14124	3.43247	1.35761	4.37489						3.95258	3.44638	4.19531	3.36513			2.93193
Vf	17	23		4.15336	2.735			0.826869		4.1554	2.33882	1.75525				-6.77373			4.20014	2.04652	4.11772	2.14088		3.31306	1.57378			4.8365		4.16313					3.98949	4.07928
Vf	17	24	3.89271	3.54728	3.53203	4.52542	4.78366	1.03181	5.05395	3.48014	2.35298	0.944071	2.30061	3.74571	5.64981	5.05749		3.81286	4.4005	2.25612	2.79267	1.27941		3.0224	1.38925	4.19336	5.63068	4.92878	4.0265	3.07928	1.26026	5.38496	4.68698	6.63037	3.6617	3.25502	4.0036
Vf	17	25	4.40225	4.15952	3.86279	3.65458	5.34865	2.01372	6.55262	4.12923	2.4825	1.79045	2.61052	3.99285	5.44732	1.41893	-5.17743	4.12248	4.44797	2.95209	3.60766	-1.23201	0.458833	3.40255	2.31915	5.14061	7.04886	4.65945	4.4371	4.30803	1.929	5.12279	5.85351	6.51851	3.96776	4.25969	4.33176
Vf	17	26	4.23577	4.16668	4.15244		5.33712	1.32658		4.11693	2.8613	1.00894	3.28644	4.28282		6.56938		4.42129	4.3384	3.09821	3.40075	3.0138	2.83498	3.95927	2.2051	5.66801				4.62788	2.39944			7.49578	4.2163	5.07136	4.94459
Vf	17	27		4.66488	4.08146	4.27865	4.00254	2.04425	5.80837	4.48305	2.73343	1.84713	2.47742	3.52785		6.26207	-4.99225	3.26485	4.38712	3.45628	4.02722	2.46522	1.54065	3.13573	2.86969	4.658	6.05	4.67726		4.46222	3.1543	4.97222	5.18922	5.28723	3.83166	5.15898	4.66099
Vf	17	28		-4.50567	-3.90167	-4.84374		-2.33173		-4.8165	-3.59039	-1.87124	-3.13533			-6.31202			-4.74067	-3.78529	-4.31521		-2.68671		-3.05408	-5.42236		-3.98116		-4.96467	-3.43447	-4.80517			-4.78013	-4.91035	-4.70248
Vf	17	30	4.46015	2.83131	3.81014	-1.83387	-4.66798	1.11831	-1.48989	2.71928	2.94073	-0.243046	1.85277	3.92597	-7.4527	5.76215	-5.74771	1.83011	1.95479	0.72346	2.76924	2.16859	1.40031		0.951434	2.48515		2.64606		2.26072	-0.0340246	-1.27017	5.88249	3.68946	2.32095	2.53261	0.465281
Vf	17	32		-0.896498	4.18982	-4.85481	-5.93484	-0.418709	-6.98454	-0.346523	1.61721	-2.1205	-3.03325	3.92597	-4.65474		-6.8972	3.63442	-2.19028	-1.35514	0.0569877	2.57869	-1.60558		-1.06275	2.06844		1.94903		-1.31552	-3.66011	-5.12289		5.83006	0.381844	-2.10857	-2.30994
Vf	17	34		4.37066	4.35283	3.9288	4.4553	2.44115	5.14146	4.34469	3.8811	1.75709	2.35658	3.64294					3.99564	2.97964	5.00259	2.62512	2.86374		3.843	4.95657	6.01342	4.30242		4.76252	3.12636	5.27177		5.22919	4.19542	5.37758	5.17239
Vf	17	35	3.07291	3.86548	4.2104	2.82046	3.81738	1.27571	5.17738	3.81195	2.75982	0.724808	2.32166	3.41317					3.47685	0.772366	4.0777	2.46799	1.31971		1.4959	5.71721	5.76204	4.36363		3.06189	2.14016	4.50313	4.58088	5.50074	3.18276	3.60934	3.68768
Vf	17	37		-4.67606				-2.07682		-4.22656	1.13179	-2.37556	-2.87489						-5.1924	-3.12601	-3.73469	2.48299	-2.70848		-3.22364	-6.85102				-6.64391	-3.50002	-5.45201			-4.51882	-6.49784	-5.36211
Vf	18	10						-1.4474			-3.42681	-1.54868	-2.60955							-2.62633	-3.77349	-3.70463			-3.09931						-3.67659
Vf	18	15										1.50821	3.40013									2.95809
Vf	18	17			-3.504			-1.42345		-2.75541												0.56055	0.855536		-2.63328
Vf	18	18																				2.07167
Vf	18	20			-3.65333			-1.33955			-2.30094										-3.19531	-1.4604	-2.26513		-2.70446						-4.22858
Vf	18	23			-3.976			-0.944838			-2.37426											1.19162			-2.71919						3.62965
Vf	18	24	-5.90967	-1.41215	-4.11025	3.58016		-0.11909	-6.71994	-1.43094	-0.710734	0.289063	0.971566	-3.93807	5.47561			3.49797	3.02278	-0.0519541	-1.48627	0.977382			-0.305518					-4.68034	0.566048	4.60281		6.27035	0.454712	-1.93621	-1.97976
Vf	18	25	-4.60623	1.7011	-3.74475			0.869918	-5.49767	1.11032	0.170914	1.56628	2.01792	-4.51106	5.59205	-6.44245		3.95256	4.12946	1.57662	1.08449	-1.75318	-2.01263	4.49742	1.60348					0.132763	2.78062	5.45441		5.91969	2.65437	4.19804	4.48074
Vf	18	26						0.413197			3.96301	0.642443	3.90129					3.56078	5.33558	3.71814	1.97045	3.17676	3.1272	3.69627	1.27194						4.50989			6.26609		4.01796
Vf	18	27						0.809796			1.64147	1.72209	1.51177						4.82816		2.77177	2.45336	2.00881		2.1523						3.97742	4.01628			3.25962	4.23031	3.833
Vf	18	28	-4.94525	-4.2138	-4.33362	-5.76923		-3.29722	-6.73329	-4.43066	-2.82557	-1.78738	-2.98104						-6.17102	-4.5643	-4.97801		-2.58388		-3.5942		-8.35235			-4.65385	-3.64434	-5.28785			-4.98833	-5.41535	-5.19374
Vf	18	30	-5.25036	-4.86766	-4.46414	-5.11431	-5.20892	-1.2518	-7.36348	-4.87834	-0.295258	-2.52904	-1.47068	-4.28817				-3.83971	-4.96583	-4.74525	-4.72172	1.55073	-1.03307		-2.95991	-6.18224	-7.81204	-5.29978		-4.85262	-1.2113	-5.26042		-6.37457	-4.71331	-4.88747	-4.87528
Vf	18	32	-5.07911	-4.65391		-4.82946	-5.1517	-2.18411	-7.22861	-4.84942	-3.49198	-3.59729	-2.68502				-6.61947	-3.58534	-5.58926	-4.45123	-4.80555		-2.93063		-3.86175	-5.58058	-8.01532	-4.65944		-4.99985	-3.68831	-5.00621			-4.43452	-4.8134	-5.07453
Vf	18	34						2.01162		3.2761	2.76436	1.49328	2.97173						4.36496		2.87688		2.80383		3.61591						3.94948					3.42585
Vf	18	35		-4.3264		-4.81487		-0.254835	-7.19419	-4.5903	-0.507007	-1.54044	1.57189						1.18728	-4.92622	-5.01509		0.32757		-0.604023	-5.72594				-5.97738	0.199129				-2.19397	-2.07075	-1.44212
Vf	18	37	-5.60625	-5.50196				-3.12199		-5.79586		-2.79821	-2.80076						-4.99463	-3.77987	-5.03893		-3.00936		-4.35477	-6.49351				-6.33309	-3.52822	-5.6935			-4.62422	-5.36656	-5.52543
Vf	20	10						-0.495843			-3.41586	-1.52567	-2.78088	-4.42558					-4.53314	-2.77394	-3.52733	-0.701165	3.29675		-2.81481						-3.44934
Vf	20	15		4.32514	4.60629	4.65912		2.75679		4.39757	3.56079	1.82578	3.27547						4.61996	4.16715	3.77911	3.50177	3.03325	3.31016	3.59709				4.33607	4.13617	4.14617	4.84389		6.45813		5.09027	3.99595
Vf	20	17		-3.14454	-3.402			0.884305		-2.95676	3.47826	2.08393	2.02179	-4.15506		6.85506			-4.12399	3.88535	3.84507	1.15039	2.11948		2.00718					3.53698	4.13335					1.77338
Vf	20	18			3.53225			2.16047		2.76726	3.1906	1.87802	2.91198							3.29992	2.84336	2.86212	2.41051		2.94671						3.88285
Vf	20	20			1.48543			1.21325		2.9556	1.94455	0.442374	1.5374	4.48041					4.50955	3.29587	2.6764	0.463469	0.340675		1.35077						-0.0843807					4.13963
Vf	20	22		3.76206	3.5938		23.4902	2.3792		3.83768	3.22287	-1.20056	3.91416			8.09857			4.75412	3.9041	3.94193	3.5292	3.23516		3.48024					3.92417	3.05995					3.98181
Vf	20	23		3.85839	1.85738	4.79121		0.954899		3.91333	2.21565	1.29922	3.18639			7.60661			4.84761	4.2263	3.99853	2.119	3.17241	3.07064	2.35179			4.36778		3.96507	3.87931	4.70384				4.33131
Vf	20	24	3.08458	2.47321	3.46698	3.15338	4.93334	1.47566	3.36741	2.48928	2.43377	0.701655	2.23182	0.397698	5.52763	6.62258		3.8969	3.75632	2.48192	2.26697	1.93171	3.17565	3.03432	1.69676	5.31057		5.06213	4.29984	2.85335	3.22552	5.18124	4.48389	7.09726	2.46248	3.07967	2.51378
Vf	20	25	3.25946	3.73469	3.56802	3.81343	5.78292	2.52869	6.13511	3.67766	2.77097	1.69428	2.7393	3.06014	4.55246	6.9938		4.11746	4.48123	3.35749	3.56923	0.0482343	2.40502	3.52406	2.73057	5.40716	6.91588	4.88878	4.85054	4.52362	4.00842	5.01606	5.47861	7.0622	3.26017	4.59773	4.39606
Vf	20	26	4.55246	4.20701	3.95943	4.67721	5.12377	1.49488		4.29427	3.66948	0.711581	3.76683	4.1042	-3.62391	7.11602		4.19859	4.45473	3.46814	3.60011	3.28828	3.32777	4.40245	2.55993	5.81294				4.38218	4.20508	4.14953		7.62478	4.06517	5.17229	5.15052
Vf	20	27		4.55335	3.87053	4.88766	4.14295	1.84249	5.44711	4.30771	3.2018	1.85443	2.90274	3.26834		7.29712	-4.95828	2.89353	5.06855	3.88858	4.22101	3.17113	2.51375	3.37457	3.5382	4.40761	5.91701	4.9163	3.83142	4.66055	4.01769	5.29746	4.87536	6.11845	3.79014	5.18676	4.6395
Vf	20	28		-4.49644	-4.119	-5.2144		-2.32632	-6.23773	-4.81553	-3.20962	-0.878658	-3.21381	-4.10279				-3.35071	-6.03696	-3.98983	-4.5865	3.31733	-2.64477		-3.56658		-7.45278	-3.51217		-4.22385	-3.40178	-5.43134			-4.78661	-5.82079	-4.78999
Vf	20	30	-3.16377	0.941959	3.33452	-0.718273	-3.83447	1.41657	-4.91927	1.03347	3.25014	-0.823341	1.54906	-3.43028	-4.86096	6.80864	-5.55917	-0.47322	1.35038	1.23223	1.49246	3.12852	1.75739		1.31145	-0.424516	-6.91247	-0.0594169		1.26484	2.49062	-0.19505	5.7708	3.88117	-1.31183	1.88796	-1.35064
Vf	20	32	-1.03394	-3.34342	4.12708	-3.10977	-3.38534	-0.143486	-6.79259	-2.69497	2.2452	-2.65797	-0.342954	-3.0617	-1.52076		-7.02782	-0.187542	-2.9339	-1.39528	-1.28454	3.14808	-1.33179		-1.30936	1.58237	-7.11576	1.74004		-2.83236	-0.510884	-3.99995		5.85111	-3.58644	-2.89088	-2.80442
Vf	20	34		4.35855	4.5051	4.54971	4.24194	2.89648	4.89404	4.22689	4.05408	1.80116	2.69971	3.38343		6.30365		2.58591	4.41654	3.49941	4.8393	3.1663	3.34635		4.10526	4.83548		4.26811	3.97491	4.8885	4.1128	5.55736		6.02232	3.84382	4.89395	4.67943
Vf	20	35		2.26134	4.19431	1.30622	4.04695	1.62099	2.23649	2.24159	2.69736	0.0901512	2.16892	3.06165		6.34788		2.56102	2.24055	1.03809	1.59396	3.31301	1.74293		1.85108	6.58792		4.60267	3.84385	1.71868	2.54409	4.95241	4.15702	6.37537	0.685983	2.34112	2.11251
Vf	20	37		-4.95373		-5.45686		-1.34683		-5.01328	3.12256	-2.26787	-2.9084						-5.54679	-2.3775	-4.78136	3.12458	-2.32853		-3.99904	-5.71383				-4.35048	-1.02043	-5.80085			-4.53023	-5.81551	-4.92135
Vf	22	10		-3.72287			-24.2115	-2.04093		-3.70743	-3.53443	-1.69863	-3.9243						-5.15693	-3.90601	-7.48023	-3.48808			-3.95268					-4.61259	-3.92523			-5.86797
Vf	22	15						-0.11728				1.68698	-4.10508									-2.72776			0.520926
Vf	22	17		-3.99636	-3.6695		-23.4039	-2.03097		-3.95073	-3.17866		-3.9747						-4.41912	-3.41085	-3.33991	-3.21309			-0.716209											-4.60947
Vf	22	18						-0.786255					-3.77039									-3.10916			-0.818468
Vf	22	20		-3.8088	-3.83786		-23.4291	-1.80218		-3.7989	-4.00955	-2.33482	-3.99417						-4.24708	-3.83238	-5.51209	-2.93278	-3.64009		-2.29267					-3.78626	-4.49768
Vf	22	22					22.7233	1.57155			2.18437		0.66793							2.44365	3.65911	2.3978			3.56849
Vf	22	23			-4.1415			-0.751991		-2.9312	-0.399872	1.50047	-3.42599			-6.61002			-3.75923	-1.39821	-1.16361	-0.955569			1.21675										3.41661
Vf	22	24		-4.0554	-4.49	-0.504379	-19.2371	-1.09887		-3.23475	-2.45021	0.214235	-3.14142	-4.30925	9.764			3.02218	-5.12815	-3.27858	-5.07315	-2.93986		2.77139	0.193919	4.55083		4.97041		-4.90046	-4.53819	-2.88748		5.06987	1.77742	-3.27683	-0.506578
Vf	22	25		-2.05171	-4.00749	-4.53153	-22.4268	-0.328541		-1.39523	-1.33554	1.26048	-2.86768	-4.77548	2.23425	-8.01681		-0.792997	-3.50273	-1.97567	-2.69755	-4.97959	-19.9877	2.28774	1.10949	1.85854		5.89329		-3.80447	-4.14006	0.541922		-3.45644	2.20251	-1.06487	0.260065
Vf	22	26		-3.96258	-3.372		-23.4982	-1.59281		-1.42636	-1.12138	0.559471	-2.84354		-5.05293	-5.86002		-4.64196	-5.39278	-2.06741	-3.49972			3.9206	0.911155						-4.11679			-5.55045	1.64626	-0.0956266
Vf	22	27		-0.522153	-2.7245			0.0153413		-0.374248	0.119882	1.72348	-2.49836					-3.19351	-3.46686	-0.599587	0.402368	-2.34061			1.49802							5.00472			3.97996	1.63616	4.08233
Vf	22	28		-4.85298	-4.42678	-5.27904	-24.2643	-3.58764		-5.45939	-3.53364	-1.77618	-4.29816		-5.63423	-6.13486		-4.0726	-5.99346	-5.09716	-7.29439		-3.56913		-4.6165		-8.07827			-4.52905	-3.9544	-6.5081		-5.65396	-4.96415	-5.08401	-5.45333
Vf	22	30	-4.50621	-6.17446	-4.36727	-4.97576	-18.7672	-0.654959	-6.56458	-4.92535	-0.236335	-1.84684	-3.71608	-4.35334	-6.41669	-7.93245		-4.7907	-6.01719	-3.9145	-4.84219	-3.3068	-4.13886		0.770441	-5.90054	-7.53796		-5.11294	-5.12483	-4.02446	-6.47483		-6.99932	-1.15111	-4.56215	-4.94773
Vf	22	32	-4.15893	-6.1909	-4.7968	-4.96752	-20.3893	-2.1252	-6.47908	-6.23496	-2.30611	-3.09549	-3.78759		-8.36281		4.10813	-2.77084	-6.09825	-5.00168	-6.6465	-2.92862	-5.20045		-2.30794	-5.73376	-7.74125			-5.10843	-3.99176	-6.9275		-6.42553	-4.25498	-5.99767	-5.13125
Vf	22	34		3.08517				1.56076		3.47282	3.3061	1.50386	-2.03435							2.14288	4.22586				4.36445							5.20341			4.32704	3.8112	3.95018
Vf	22	35		-5.43947	-5.501	-5.5114	-24.6165	-0.773205		-3.9362	-1.83519	-0.963805	-3.80464						-6.42676	-3.91984	-5.1074	-3.21783	-5.55566		-0.239317	-5.87912				-6.19751	-4.1135	-0.898463			-0.709866	-2.29747	-0.704472
Vf	22	37		-6.48694		-5.244	-24.9824	-3.41284		-6.57106	-4.51708	-3.05974	-4.26022						-5.20961	-4.51742	-6.85424	-3.43108	-4.53218		-4.28563	-5.86465				-6.28265	-3.77685	-7.19983			-5.54464	-5.97642	-5.79157
Vf	23	10		-3.85759		-4.80882		-2.48133		-3.83563	-4.48412	-2.06149	-3.2847						-5.02229	-4.22385	-5.1669	-2.51695		-3.78638	-3.9956					-5.02414	-4.09268	-4.93462		-6.08066		-4.36765
Vf	23	15		3.92526	4.8525			1.13519		4.08598	3.43419	0.592972	2.93725							3.25725	3.36238	-0.560744		3.79435	3.36935	5.05092								5.84518		4.11868
Vf	23	17		-3.99905	-4.4555			-1.19331		-3.9649	-1.40204	-1.37948	-2.82385						-4.52144	-3.61475	-0.107859	-1.8376		-3.37043	-1.45605					-3.57865					-3.20962	-4.37205
Vf	23	18			3.415			-0.613004			-0.237402	-1.52615								-3.56239		-1.33476			2.27692
Vf	23	20		-3.67098	-3.3635			-0.993825		-2.5534	-2.45016	-1.25013	-3.38672	4.20894					-4.69409	-4.38084	-4.26766	-1.64689	-3.14839	-3.87134	-3.67543			-5.1053		-4.2293	-4.40478	-4.66176				-3.98702
Vf	23	22		3.99817	3.5805			1.89322		4.07666	3.40617		4.2422						3.59581	2.89049	3.90493	3.58151			3.01135
Vf	23	23		4.00086	-0.2805			-0.318907		0.57273	-0.219772	0.59728	-2.64364			-7.52528			-0.0817104	-1.25254	1.29084	-0.191792		-0.026264	-0.280604	-4.6096		0.169032		-3.89936
Vf	23	24	-1.45184	0.664551	1.20686	-1.31686	4.15556	0.0806935	-0.0575255	1.06378	-0.219382	-0.159075	0.681963	3.87331	5.62331	6.53908		4.15117	0.311657	-1.05014	-0.39746	-0.064166		1.08106	-0.055443	3.13716		-2.28502		0.107097	-2.92703	-2.68333		4.42114	1.5364	-0.0418444	1.28235
Vf	23	25	-3.963	1.27782	1.89324	-2.71004	-2.93815	0.866117	2.42656	1.4509	0.0478528	0.439479	0.665332	4.3324	2.76063	1.53758		2.02496	1.22744	-0.285799	0.337312	-2.26923	-18.5313	2.19885	0.890102	4.71012		-0.540923		1.81532	-3.53206	1.03937		3.54948	1.40187	0.728698	2.35504
Vf	23	26		0.194753	0.7652			-0.640463		0.208633	-1.18669	-0.207653	0.732148	4.28378	-6.1302	6.58645		-0.117406	0.507545	-0.815492	-1.27993	2.89872		1.94255	-0.0734355	5.17568		-6.11639	-4.0058	1.50868	-4.16417	-5.66441		2.60639	1.88527	1.31631	4.87498
Vf	23	27		1.02422	2.5928	4.11571		0.550677	5.81747	1.06307	0.588577	1.62358	0.631613	3.51576	4.31486	6.03624	-5.28279	1.41603	1.47418	0.934965	1.83266	2.18998		3.22004	0.940709	5.00427		2.18348		3.25292		5.05447		5.46741	4.29959	2.47946	4.38606
Vf	23	28	-5.31951	-5.22021	-5.5825	-5.89755	-4.43614	-3.13891	-6.63606	-5.28898	-4.01016	-1.88417	-3.5158		-6.7115			-4.10398	-5.71939	-5.16675	-5.7264		-3.13912		-4.06031	-6.0594	-7.77281	-6.5628	-5.24473	-5.25795	-3.55402	-5.80587		-5.88337	-4.93029	-5.72126	-4.941
Vf	23	30	-5.62462	0.561355	1.55131	-5.98188	-5.71147	0.646814	-5.88478	0.833234	1.58027	-1.08363	0.121428	3.96505	-4.95407	7.15604	-4.60955	0.334837	-1.29137	-1.96067	0.825537	1.40789	-3.77276		0.275276	-0.441086	-7.2325	-3.69909	-4.91212	-0.797625	-3.94736	-4.71338		3.23834	-1.43172	-1.62606	-2.07311
Vf	23	32	-5.45337	-4.72585	-2.03309	-5.77422	-5.65886	-1.27139	-7.02495	-4.0889	-0.634364	-2.72824	-3.31573	3.96505	-5.90217		-6.93538	-2.01472	-5.47923	-4.0113	-3.14081	2.53199	-4.49324		-2.69708	-1.39643	-7.43579	-5.30432	-4.79559	-5.82112	-3.98432	-6.97865		-0.800791	-4.68265	-4.92807	-4.339
Vf	23	34		4.1043	4.6275			2.02068		4.18608	4.02688	1.08955	2.35835	3.63084	4.47221	6.22231		2.77485	3.62968	2.82556	4.74694	2.57841			4.08792	5.10539		4.12924		4.82802		5.25316		5.40938	4.18015	4.94622	4.80963
Vf	23	35		1.34729	1.74725	0.48617		0.585891	-7.39795	1.28493	1.03232	-0.0523734	1.44255	3.30907	-0.319011	5.54358		2.74996	1.56591	-1.18987	1.72793	-0.240206	-5.0142		-0.0974758	3.58409		1.3139		0.360284	-0.748633	0.728986		5.49904	0.729309	-0.466038	1.19
Vf	23	37	-5.98051	-4.85644		-5.34499		-2.68682		-4.94319	-1.39439	-2.91058	-3.36207						-5.66371	-4.40085	-4.85623	-3.41659	-3.95619	-3.62165	-4.47916	-6.99054		-6.41617		-7.45042	-3.71711	-6.63077			-6.01831	-5.71025	-6.42355
Vf	24	10		-3.83917		-4.72333	-3.93262	-1.3923		-3.60294	-3.59103	-1.96035	-3.59315	-3.89897					-4.46391	-3.71148	-3.9349	-3.43287		-3.21016	-2.81449	-4.34532				-4.9189	-3.919	-5.02621		-6.87322	-3.73862	-4.644	-3.73817
Vf	24	15	6.14619	5.0091	5.4815	5.92405		1.36256	8.47109	4.68863	4.08796	1.73956	4.32797						5.65353	4.52205	5.43555	0.0121506		3.76672	5.04499	7.04938			6.209	5.44365	4.64965	5.85703		6.93825	5.54225	6.11139	5.29952
Vf	24	17	-3.15865	-3.41528	-4.21103	-4.4096		-1.25474	6.61466	-3.30288	-1.06254	-0.277292	-2.7534	-3.42016		-13.0304			-3.98339	-2.24307	-1.2178	-1.61444		-2.7942	-1.70745	0.5931				-2.73047	1.07521	-4.24669		-6.44122	-0.65169	-3.73494	-1.82959
Vf	24	18			3.923			0.0366812			3.59094	0.00364719	-1.80688						4.51946	3.28472	4.405	-1.34488			3.12861						4.29476
Vf	24	20		-3.13509	-3.81398	-4.69171		-1.12061		-2.86299	-2.2541	-0.688689	-2.65335	-4.09379		-11.0118			-1.15635	-2.89483	-1.35575	-2.0484	-3.41884	-2.7653	-2.28335					-3.88719	-2.99624	-5.07257		-6.83188	-0.589565	-4.04626	-3.19573
Vf	24	22						-0.744595			2.24782		3.54937							3.17388	2.94432	1.33954			-3.04881
Vf	24	23	6.7954	0.878421	-3.367			-0.996293	6.51867	0.494399	-0.948465	0.11558	-1.68889	-3.43817		-6.26758			3.00257	-0.692634	0.985865	-0.878835		-3.15061	-1.26109	-4.24074				-0.246345	2.89703	-0.94616		-3.19803	-0.000430121	3.27738	5.27804
Vf	24	24	0.898589	0.194255	-0.41878	0.213921	4.89498	-0.13647	0.885175	0.247712	0.470369	-0.219544	0.335364	-0.419585	5.87076	-5.55727		2.85061	1.46678	0.159563	0.104423	-0.216146		1.29127	-0.249204	2.02781	-1.90518	3.70553	4.60849	0.584786	0.251602	0.646429	5.43811	3.56601	1.15603	0.741097	1.92408
Vf	24	25	1.192	0.885578	-0.572367	0.482457	3.58502	0.494373	4.66977	0.859693	0.73637	0.80699	0.0279547	0.00313915	3.47968	-5.96777	-4.22396	2.1122	2.5413	0.542141	1.14667	-2.44077	-14.4112	1.11372	0.622049	4.07137	6.02533	3.09062	4.05618	1.61059	1.19646	2.56967	1.03693	1.54028	1.76356	1.65843	3.63188
Vf	24	26	5.44169	0.393742	-0.737187	2.57614	3.14968	-0.674589	4.7025	0.331561	0.71631	-0.385227	0.177112	4.83095	-5.09077	-2.8128		-0.280843	0.555647	0.105348	-0.418676	3.56041		2.27745	-0.896939	4.6272	-1.97144	0.786204	0.904446	2.62585	1.48752	-0.884028	-1.10893	3.3616	0.728104	1.31126	2.73286
Vf	24	27	3.30406	2.0656	0.438789	2.00532	4.91082	0.309938	6.18248	2.21321	1.56478	1.7079	-0.110211	3.35197	3.47276	-4.21719	-5.60913	-1.09276	2.641	1.31602	2.96245	3.62331	0.0134268	0.217554	0.809339	5.34392	7.15886	5.00495	4.63144	3.17308	2.86537	3.4709	5.51988	-1.03127	3.41466	3.77813	4.83778
Vf	24	28	-4.97335	-4.71748	-4.7889	-5.74454	-4.72212	-3.41217	-6.78286	-4.87865	-2.42593	-1.70792	-3.82494	-3.28243	-5.53453	-8.2522		-3.84319	-5.65221	-4.7173	-5.07557	4.33762	-3.22668		-3.69046	-5.15693	-8.02064	-4.82336	-5.0393	-5.05141	-3.86639	-6.2569		-6.71401	-5.23828	-5.41775	-5.2136
Vf	24	30	-3.51078	-1.77481	-0.71483	-2.66325	-5.02798	-0.0539759	-3.60744	-1.68622	1.87289	-1.86805	-0.66551	-2.95167	-3.01637	-6.62762	-5.8881	-3.43759	-1.27142	-1.37899	-0.845278	1.69474	-3.91576		-0.898788	-3.08814	-7.48033	-5.10919	-4.90314	-2.00736	-0.232094	-2.20816	-0.805552	-3.91915	-2.29932	-1.33397	-2.04031
Vf	24	32	-4.35926	-4.75274	-4.05857	-4.56429	-5.47005	-1.65181	-5.69692	-4.6641	-0.768106	-3.03903	-2.72309	-3.28232	-7.20954	-9.67655	-7.03059	-2.66796	-4.3938	-3.791	-3.41405	3.82982	-4.65876		-2.85639	-4.21092	-7.68361	-5.10536	-4.70819	-4.34443	-2.30606	-5.3158	-5.29385	-6.05921	-4.43931	-4.46575	-4.42999
Vf	24	34	5.34155	4.78596	4.268	5.45537	4.96595	2.05004	7.26504	4.56104	3.56255	1.1179	2.83214	4.08099	2.69255		-2.17886	0.974602	4.18053	3.36161	4.24184	3.72709	3.14101		4.35965	5.8232	7.12228	4.62348	5.2585	5.25479	4.5534	6.53457	5.2162	5.60383	3.3137	5.49947	5.01573
Vf	24	35	5.58017	-0.0705763	-0.280846	-0.148571	4.82991	0.317276	-0.101511	-0.508805	1.39756	-0.663161	0.800231	3.75921	-0.380823	-13.8857	-2.46944	0.949707	0.726506	-0.919909	-0.192205	3.81851	-3.87614		0.0121505	0.974484	6.87091	3.92278	5.12745	-0.694825	0.873637	1.74389	5.25298	0.262284	0.698823	0.476442	1.3743
Vf	24	37	-5.1498	-5.08837	-3.3664	-5.71331		-2.42654	-3.7913	-5.06203	-0.681103	-2.71474	-3.41722			-11.7315	-6.77361		-5.08105	-3.76954	-4.03462	1.48758	-4.03044	-2.55783	-2.10757	-6.68543		-5.85812		-6.11145	-2.84359	-6.62576		-5.03114	-2.90241	-5.64343	-4.13151
Vf	25	10	-4.58613	-4.33953		-4.8708	-5.92244	-1.74566	-7.14037	-4.28221	-3.34329	-2.07603	-3.17619	-4.90456	-5.01339			-4.24055	-5.09529	-3.74773	-3.75124	0.36233	17.8314	-3.46008	-2.73974	-5.47716	-8.80243	-5.35067	-5.02206	-4.84549	-3.86645	-5.21482	-5.536	-7.20503	-3.29106	-4.63732	-4.7251
Vf	25	15	5.23293	4.16239	4.2685	5.04111	5.45225	0.499669	6.59882	4.09489	2.62306	0.01262	3.34217	1.72278	6.08393			2.35752	0.245485	3.94552	3.69701	4.53752	18.982	1.02334	1.30712	1.20742		5.17495	5.24432	4.94484	2.70267	4.90423	4.76469	6.59342	3.76889	3.80598	3.92095
Vf	25	17	-4.28521	-3.218	-3.46214	-4.20834	-2.81017	-1.04393	-5.80424	-3.03928	-0.874173	-0.610873	-1.85078	-3.91629		3.82166		-4.07691	-3.75624	-1.56186	-1.59538	2.41605	0.574587	-3.01698	-1.61127	-4.59669		-2.35677		-2.38363	2.20449	-4.90474		-6.66601	-2.6303	-3.04281	-4.19038
Vf	25	18	4.50669	2.02162	3.57645			-0.00196291	5.97574	1.75304	1.5013	-0.809336	-0.586948	1.64257		5.40003		-2.86998	-2.19013	0.427192	2.84686	3.79127	-2.91599	-0.440103	0.11738	6.18165				4.23674	0.68676	-5.04456		-3.985	1.13181	0.568621	-4.5858
Vf	25	20	-4.04514	-2.48685	-2.94116	-3.07155	-3.84179	-1.05041	-5.67685	-2.32128	-1.9385	-0.99369	-1.56564	-2.73444	-0.924716	-6.73027		-3.75961	-2.64641	-1.88789	-1.77942	1.53414	-1.76131	-2.87157	-1.77044	-4.79495		-4.23614	-4.40158	-3.35019	-3.02591	-4.72309	-5.37132	-7.09995	-1.25546	-2.73592	-4.17153
Vf	25	22		3.01155	3.92665		24.5106	1.17109		2.57427	2.77064	0.224401	3.76433	-4.39907		6.83256	-4.59713	3.89307	3.91299	2.93094	4.56239	5.06056		0.390428	0.282426	-4.84222				4.67309	3.63124	2.36685		3.47206	1.26622	3.38584	4.57394
Vf	25	23	0.994636	0.444497	-2.17517	2.22511	1.95329	-0.794003	-2.56548	0.40754	-0.102612	-0.471412	-0.772805	-4.40933	-5.02952	-4.74244		-2.10677	-0.85351	-0.1458	0.177289	3.16024	18.5868	-2.16675	-1.17726	-4.9311		-0.181322	4.41494	-1.12617	3.19434	-0.387384		-3.69932	-0.504117	0.208091	-1.6261
Vf	25	24	0.376632	-0.145166	0.699921	1.15933	1.56375	-0.23982	-1.07024	-0.107323	0.462049	-0.592644	0.624739	-1.50352	3.26925	2.38277	2.66976	2.12503	-0.122534	0.10228	-0.356486	3.07575	19.1937	0.457833	-0.234095	-0.268501	-2.22916	2.24333	1.53094	-0.101001	0.180804	-0.0956234	3.18464	2.71016	0.783294	0.191581	-0.203071
Vf	25	25	0.292272	0.838569	0.562024	0.285646	2.10366	0.509717	1.38538	0.873544	0.641797	0.266278	0.643805	-0.441968	1.45779	-0.799552	-1.41081	0.840155	1.14671	0.690013	0.809372	1.16456	2.31308	0.614491	0.605289	1.52762	3.08522	1.61183	2.18591	1.45034	1.09483	1.16095	1.34248	1.39771	1.13984	1.18193	0.929162
Vf	25	26	3.31567	0.44795	0.856287	2.82444	1.11877	-0.694982	-1.12337	0.352517	0.680253	-0.808369	0.858244	1.07341	-3.68552	3.02412	-4.10804	0.763823	-0.448149	0.174358	-0.207373	4.80037	15.3932	0.787972	-0.422006	0.848656	-3.19481	0.877938	-1.11959	1.88461	1.10413	-2.89979	0.250369	1.61993	0.968005	1.20797	-0.916322
Vf	25	27	1.87155	1.3281	1.18723	1.5066	2.89609	0.460481	3.91004	1.40913	1.16824	1.29449	0.528833	0.107618	3.13121	2.57436	-0.399373	0.373087	0.705257	1.22241	2.07895	4.64268	2.47198	-0.132712	0.654983	1.42357	6.0613	3.35779	0.45353	2.09676	1.49516	2.65257	4.77249	0.0128873	2.6973	2.15417	3.41422
Vf	25	28	-4.84686	-4.84555	-4.39873	-5.40751	-5.57439	-3.34969	-6.94028	-5.00089	-3.09206	-1.85132	-3.35154	-4.40385	-5.67019	-6.47594	-5.08881	-3.9012	-6.0692	-4.62121	-5.2157	4.57557	-3.10128		-3.92891	-5.7283	-7.77575	-5.2765	-5.13121	-4.9853	-3.77032	-6.03452	-4.98881	-7.06686	-5.22766	-5.99001	-5.63212
Vf	25	30	-2.92056	-1.23058	0.766847	-2.48097	-3.27891	0.01179	-4.56417	-1.06016	1.81178	-1.92141	0.101139	-2.71518	-4.29194	1.44221	-3.8615	-0.764312	-1.65965	-0.97142	-0.597981	4.50516	-1.91239		-0.528598	-3.62255	-6.63859	-3.1726	-3.48699	-1.46068	-0.200524	-2.3612	-0.965654	-0.818773	-1.54557	-1.09586	-2.54546
Vf	25	32	-4.14406	-4.44774	-2.63958	-4.14981	-5.17275	-1.89604	-6.54205	-4.33995	-0.789623	-3.35797	-2.19099	-3.80541	-7.12696	-6.06063	-5.83149	-2.64729	-4.86316	-3.51148	-3.32151	4.54276	-4.44785		-2.96312	-4.98823	-7.59524	-4.82434	-4.56299	-4.46352	-2.74175	-5.56234	-4.54892	-4.29007	-4.09688	-4.69287	-4.80095
Vf	25	34	4.7088	4.24631	4.22645	4.76694	5.53554	1.92231	5.74862	4.21724	3.52968	0.789624	2.82194	3.60377	4.19696	5.80456	-2.77974	2.48366	3.84521	2.40451	3.80149	4.82921	5.36684		3.44801	6.02714	6.44809	4.65453	4.49517	4.75677	4.15892	5.20224	5.3066	5.80084	3.07902	4.78558	4.61866
Vf	25	35	1.43611	0.41864	1.35883	0.279018	-0.739272	0.265077	-1.66731	0.411986	1.54598	-0.776324	1.43403	1.12884	-4.04405	6.38067	-3.58373	0.776992	-0.334294	-0.538463	0.353168	4.815	-2.55309		0.203534	-0.65682	-1.44993	2.20795	2.19653	-0.905429	0.596265	1.40557	3.39173	2.64401	0.225925	0.0497292	0.309853
Vf	25	37	-5.40674	-5.11344	-2.58553	-5.08906	-6.17609	-2.74885	-7.1178	-5.00524	-1.5518	-2.76146	-3.10321	-3.27164	0.655937	-5.37587	-7.92825	-3.11009	-5.07482	-3.61847	-4.67674	4.56666	-3.80736	-3.91183	-2.96041	-6.38581	-8.15431	-5.86003	-5.13686	-5.57711	-3.09243	-6.14992	-5.66024	-5.36987	-3.57173	-5.44366	-5.7513
Vf	26	10		-4.31954		-5.12798	-6.13467	-2.39197		-4.38443	-2.89442	-2.18053	-3.893	-5.37687					-4.68432	-3.65461	-3.05799	-3.92894		-4.0285	-2.89531	-6.20601	-8.71515			-5.33302	-1.98047	-4.57403	-5.54839	-7.96776	-4.76442	-4.76144	-5.39518
Vf	26	15		4.06197	4.887	4.43899		2.15399		4.14025	2.74114	1.22905	4.06896		5.72491			4.07837	5.68815	5.86461	5.40815			3.63119	1.81476	4.51391			5.39989	3.88301	4.22825	5.75722		5.94568	3.44545	5.74203	4.04619
Vf	26	17	-3.9559	-1.57421	-1.92583			-0.489965		-1.29608	0.889989	0.292678	-0.382124	-5.10635		6.02373		-4.61044	-1.15302	-0.417203	0.648021	-2.83483	-2.96193	-4.75909	-1.99789	-5.24572				-3.88492	1.51564	-3.79402		-7.16566	-4.75036	-2.31163	-5.25117
Vf	26	18		3.26106	3.73			1.73445		3.49166	2.12174	1.44034	0.941222						4.26962	3.14677	4.4797				0.312696						3.86816
Vf	26	20		-0.740333	-1.3747			-0.605453		-0.739656	-0.979328	-0.320956	-0.0118458	-4.45451	5.11779	-7.14474		-0.830468	1.74857	-0.635753	0.250964	-3.14421	-3.03869	-4.18031	-1.78887	-5.13281				-4.18464	-1.36055	-4.30118		-7.24904	-3.75465	-1.27044	-4.85275
Vf	26	23	-4.17585	-0.694495	-2.3875			-0.60323		-0.823259	0.0957788	-0.6382	-0.909513	-4.67191		-3.0186		-0.220241	0.369807	-1.20292	-1.03765	-2.78812		-3.96895	-2.25669	-5.35301				-4.40777	4.40431			-1.52422	-0.687557	-1.44695
Vf	26	24	0.324538	0.0590702	0.684	-0.317531	4.57227	0.201398	-0.9631	0.0808564	0.500007	-0.233384	0.826592	-1.23969	5.26398	3.4565	2.71941	3.73831	1.5038	0.51075	0.259056	-2.5073		0.866352	-0.707547	2.97446	0.814776	4.85424	4.30508	-1.25439	1.13522	-0.735494	5.81318	4.89454	0.243028	-0.215135	1.70298
Vf	26	25	0.74122	1.21661	1.09016	0.0899804	2.75549	1.32262	-0.381305	1.25101	0.912841	0.786036	1.254	-0.405286	4.78647	0.0312949	2.97736	2.50989	2.38831	1.12876	1.33003	-4.341	-16.0997	1.21767	0.3223	3.15353	5.81507	4.39571	4.12718	0.522495	2.46945	2.6548	3.41268	3.20877	1.08839	1.08385	2.35564
Vf	26	26	4.79444	0.497058	1.12243		5.33493	-0.157394		0.765708	0.632779	-0.544291	0.972954	3.8866	0.997363	2.34638		2.31298	1.0904	0.29661	0.0282545			0.254491	-1.26298	4.90511	-3.17059	5.81748	5.19669	-1.01155	2.44408	-3.42374	5.44937	2.10098	-0.84148	1.14315	0.192773
Vf	26	27	1.14206	0.840114	1.7185	4.09681	4.39798	1.03113	6.76138	0.998918	0.796126	1.48848	0.308326	3.02154	5.52957	-2.25217	2.57183	1.11002	1.16364	0.801715	1.71887		-2.8226	-0.872272	-0.3364	4.73369	6.5501	4.27579	4.75124	-0.783238	1.58831	3.47422	5.94749	-0.252107	2.53413	1.41653	4.44261
Vf	26	28	-4.36988	-4.70418	-4.13625	-5.20692	-4.27914	-3.18483	-5.84474	-4.90283	-1.63081	-1.76408	-3.05561		-6.07101	-6.83905		-3.2677	-6.07197	-4.49429	-5.43864		-2.93598		-4.4084	-4.61673	-6.90601	-4.6507	-4.50871	-5.157	-3.47221	-5.76713		-5.24856	-5.45639	-6.15635	-5.18631
Vf	26	30	-2.95867	-1.18221	0.610333	-3.50908	-3.46763	-0.0842185	-6.60588	-1.12817	2.17785	-1.74097	0.288294		1.56945	1.45735	-2.12908	1.68104	-0.771947	-1.11078	-0.35987		-3.65555		-1.16195	-2.1035	0.519702	-2.63913	0.167769	-3.36236	0.361	-3.05781	1.29641	2.40463	-2.73639	-1.71725	-1.9556
Vf	26	32	-4.72712	-3.88479	-2.5113	-4.26793	-5.07248	-1.81254	-7.05245	-3.72821	-0.372335	-3.09719	-1.20635	-5.97833	-3.57246	-7.22513	-5.48507	-1.3042	-4.01291	-3.43596	-3.08087		-4.55285		-3.30862	-3.40887	-7.43445	-5.0792	-1.65025	-4.79231	-1.76084	-4.83874	-4.21671	-0.798924	-4.47365	-4.65963	-4.27865
Vf	26	34	4.25528	4.57264	4.0205	4.18846	4.45311	1.96487		4.39468	3.52854	1.00761	2.97881	3.13663	5.86723	5.47232		3.09283	3.99377	3.47376	3.63058		2.91563		4.22914	5.61126	7.53589	5.37617	5.03872	5.18185	4.4426	5.91772	5.02229	5.50987	2.16166	4.83727	4.71626
Vf	26	35	4.19711	-0.140578	0.3982	-2.69438	-0.251399	0.456697	-6.8922	-0.249163	1.86332	-0.620195	2.29772	2.81486	-1.80854	5.51655		3.47207	-0.279526	-1.23467	-0.13939		-3.61718		-0.364267	1.51385	7.28452	4.92376	4.90767	-2.09551	0.637561	2.25643	6.08769	6.54438	-0.15062	-0.985676	1.91375
Vf	26	37	-4.56756	-4.54481	-2.32233	-4.63422	-4.58852	-2.54909	-7.30586	-4.68436	-0.946297	-2.8613	-2.54568		3.67757	-5.46375		-3.91212	-3.92831	-3.02001	-3.70011		-3.87748	-3.86378	-2.81388	-5.81238		-4.99471		-6.5237	-1.7283	-6.06561		-7.87801	-4.98991	-5.80564	-5.43772
Vf	27	10		-3.88483		-5.0061	-4.1443	-2.17663		-3.89267	-3.90525	-1.99295	-3.81248	-3.86364			4.86944		-5.40289	-4.23825	-5.13049	-4.407		-2.97641	-3.3697	-5.17052				-5.23905	-3.99647	-5.58275	-5.68457	-6.24785		-4.40275	-3.68914
Vf	27	15		3.41394	3.3925	4.11801		-0.42808		3.3473	2.24148	-1.04066	0.788976				6.35503	2.62992	-0.895675	2.34729	-0.622029	-1.57588			-1.56259				4.21257			3.8459		5.28052		3.65677
Vf	27	17		-3.75789	-4.36905			-2.13819	-5.40155	-3.79352	-2.69974	-1.60452	-3.04527	-3.60299		-7.26589	6.06514	-4.02982	-4.4301	-3.66252	-3.69316	-2.91264	-2.32049	-2.81658	-3.15113	-5.04968		-3.48325		-3.60636		-4.80322		-6.67327	-2.83994	-4.50331	-3.52006
Vf	27	18						-1.42367			-1.71369	-1.69132	-3.70652				4.96688		-4.40469	-2.93817	-2.84082	-2.82218	-2.80143		-3.26559
Vf	27	20		-3.76222	-4.23638	-3.89683	-3.75188	-2.32991	-5.55524	-3.7718	-3.34463	-1.84674	-3.54314	-3.59709		-7.4277	6.14221	-4.01215	-4.44498	-4.12756	-4.29755	-3.72208	-3.06825	-3.54185	-3.38394	-4.93939				-3.95285	-4.30362	-5.18491		-5.18488		-4.11173	-3.23339
Vf	27	22						-0.411578			2.413	-1.78697	2.83251							0.035712	-2.71523	2.3173			-3.04984
Vf	27	23		-3.25543	-3.99175			-1.74554	-5.85987	-3.30792	-2.42346	-1.1726	-3.13037	-3.40285		-9.08414	6.43863	-3.48364	-3.74225	-2.79825	-3.63248	-3.0175		-2.79569	-2.94267	-4.87055		-3.02643		-4.05391		-4.78912		-5.11482		-3.8906
Vf	27	24	-1.04247	-3.15288	-2.08562	-0.0678462	3.83547	-1.35972	-3.69371	-3.15727	-1.79092	-1.3955	-2.08398	-4.39067	3.66481	-4.19934	5.58676	-0.832067	-2.97448	-2.57401	-3.83805	-3.19866		0.361593	-2.26929	-2.53954	-8.19542	2.26962	2.45003	-3.51488	-2.96685	-3.24553	-1.50588	1.7428	-0.83545	-3.08412	-1.76482
Vf	27	25	-4.04004	-1.81208	-2.73501	-1.40068	-4.59484	-0.917823	-5.35973	-2.05259	-1.33291	-0.794039	-1.88905	-3.75368	0.491005	-7.63513	4.48595	-1.82243	-1.60591	-2.2029	-2.83146	-4.79935	-6.95524	-1.53697	-1.47818	-2.64694	-0.0586065	-3.29784	-1.18353	-1.64187	-2.93743	-1.44527	-5.88104	-1.85603	-1.01007	-1.61881	-3.20332
Vf	27	26		-2.71186	-3.54325	-4.58795	-3.34457	-1.78162	-6.96447	-3.08727	-1.10918	-1.27132	-2.41702	0.112364	-4.05825	-7.32163	5.14459	-2.64081	-4.61681	-2.56507	-3.61981			1.44713	-2.71684	-4.67161	-7.11026	-4.557	-3.88602	-2.6091	-3.06643	-5.44273	-5.13851	-2.78514	-0.693219	-2.74105	-4.28718
Vf	27	27		0.473532	-0.741227	3.85234	2.59065	-0.292274	3.13906	-0.0126025	-0.21907	0.757525	-1.11041	2.5201	2.46528	-4.86191	1.89494	-0.641513	-0.491603	-1.0898	-0.744057		0.298275		-0.223481	2.64067	5.71956	3.73172	2.17196	2.01551	2.02142	1.59911	3.41755	1.22979	3.17875	1.11912	3.82846
Vf	27	28	-4.47807	-6.09262	-4.88213	-5.4286	-4.26504	-3.94153	-6.89512	-5.96546	-3.55521	-2.06345	-4.17748	-3.40564	-5.04637	-8.29503	4.51646	-4.05553	-6.44141	-5.56111	-6.26368		-3.39419		-4.51828	-5.96194	-7.35074	-4.77036	-5.15244	-5.37907	-4.02285	-7.17013	-5.75312	-6.38561	-5.13441	-6.10022	-5.28554
Vf	27	30	-4.89404	-5.75396	-2.79881	-4.36058	-6.49191	-1.39817	-7.51451	-5.66455	-1.41019	-2.7894	-3.08138	-4.38851	-4.56732	-8.51209	2.09701	-3.34294	-4.94791	-4.13145	-5.18101	-3.53132	-2.90642		-3.86513	-6.87648	-6.81043	-5.29569	-4.84864	-5.29412	-3.31977	-6.52673	-6.34219	-4.03214	-4.86289	-4.57973	-5.63751
Vf	27	32	-4.66232	-6.46955	-5.24104	-5.49333	-6.30891	-2.41746	-7.89218	-6.38783	-2.57933	-3.66589	-3.74628	-4.32433	-6.40393	-7.90092	-2.91975	-4.20307	-6.13282	-4.97084	-5.89149		-4.2322		-4.49301	-6.48795	-7.01371	-5.04831	-4.61244	-6.16801	-4.05381	-7.18831	-6.21972	-5.19256	-4.80537	-6.08232	-5.90135
Vf	27	34		3.53048	2.85967	3.77383		1.57762	3.56929	3.42658	2.99032	0.299645	1.33519	2.63519	2.62262		-0.0884211	2.04894	3.18201	1.05138	2.89767		2.55074		2.2953				3.60643	3.50627	2.70081	4.62924		4.84471	2.93337	4.54557	3.84116
Vf	27	35	2.27766	-3.16011	-2.8102	-0.473959	-1.12163	-1.2062	-4.9217	-3.54858	-0.579146	-2.44002	-1.76807	2.59688	-3.1242		0.869062	-1.81614	-2.72141	-3.28559	-3.83886		-1.23625		-1.75928	-1.62891		1.2341	3.47538	-3.60997	-1.41989	-1.88449	-3.46164	-1.59672	-0.869812	-2.76385	-1.12318
Vf	27	37	-5.12118	-6.89999	-3.85967	-5.80822		-3.43444	-6.68746	-7.20918	-4.21959	-3.0658	-3.9492			-5.42883	-4.16071	-2.66697	-6.02524	-4.87143	-6.09686		-3.92451	-3.62931	-4.45589	-7.04495		-6.01625		-7.04283	-3.85578	-7.42273		-4.20125	-5.10999	-6.25278	-6.36407
Vf	28	10		-3.15108		-4.61465		-0.303984		-3.45948	-4.51647	-2.00479	-3.43758						-4.72063	-3.33973	-2.75035	-3.70633	2.5362		-3.69031	-4.50141				-5.50695	-2.50985			-5.88211	4.13928	-4.1178
Vf	28	15	5.24563	5.74499	5.4365	6.17791	4.71099	1.72806	7.67845	5.85914	3.34188	0.00620364	2.4616					3.79236	6.19077	4.98171	5.37891		3.35316		4.69389	5.58025	10.4546	4.98079	5.86043	5.16513	3.77669	6.76624		7.24091	5.30371	6.85609	5.89877
Vf	28	17		-1.59894	-1.4621	4.95458	4.5645	-0.352074		-1.80319	-1.49145	-0.951712	-1.12517			-1.54867			1.28406	-1.4031	0.342489	-2.79275	-1.36966		0.749658	-1.87279		3.86926		-1.92935	4.00415	4.86159		-5.53282	4.50102	0.467665	4.64337
Vf	28	18		3.49938	3.849			0.228105		3.58068		-1.68899	-1.4419						3.75781	0.126786	3.60262		-1.51527		2.93654					3.61906	0.176216					3.65413
Vf	28	20		-0.810052	-2.384	1.09724	4.27609	-0.306632		-1.09122	-3.48851	-1.41602	-2.49901	3.69713	5.69909	-8.94158			0.348114	-2.02001	-0.247297	-3.38392	-2.09063		-1.00446	-4.57653		3.52437		-3.08751	-2.56936	4.14307		-5.09228	4.3535	-0.294459	1.80369
Vf	28	22						-1.59759				-1.91985	-2.39489							-3.19845					-2.93445
Vf	28	23	5.83098	2.57607	0.547571	5.12682		0.375142		2.61595	0.202997	-0.450639	1.31806			-2.303		4.28404	3.05618	0.284232	2.19101	-2.80492	2.95794		1.44855	-5.35666	7.61467		5.33873	0.229812	3.95276	6.79068		2.48354	4.94847	5.45449	5.10877
Vf	28	24	4.14804	2.94814	2.54824	4.30775	5.12863	1.2123	3.59086	2.92511	0.975494	-0.401793	1.32583	2.51459	6.00798	2.75645	4.79823	4.2902	4.39682	1.22223	2.66724	-2.51288	3.04632		2.16127	3.73244	8.08958	5.31448	4.65746	2.54933	2.13879	5.30959	5.55433	6.47943	4.36715	3.9811	4.89923
Vf	28	25	4.32302	3.20382	2.20932	4.40537	4.95554	1.7882	5.14834	3.07452	0.739859	0.59332	1.21616	2.86697	5.12193	0.0420249	2.64963	3.05211	4.42779	1.3002	3.1598	-4.70858	2.4788		2.40579	4.6015	8.20776	5.02814	4.71869	2.86131	2.45226	5.78401	3.93453	4.97488	4.52263	3.94506	4.87203
Vf	28	26	5.59933	2.91009	2.09964	4.31057	5.71646	0.770611	7.38451	2.99087	1.07739	-0.428715	0.593288	4.32739	-4.5965	0.705831		1.60458	3.79431	0.954354	1.99496		3.31407		1.56351	4.81408	8.71549	5.8421	2.93882	2.92693	1.94896	6.58624	5.61694	5.53635	4.72451	4.29927	4.95075
Vf	28	27	4.67537	4.27615	2.87204	4.24685	4.48179	1.44523	6.27719	3.94395	2.31264	1.60746	1.14942	3.46234	5.31533	5.4499	2.15713	2.91579	4.17616	1.9477	3.9687		1.04242		3.06837	5.20737	7.60747	4.91318	5.26185	2.98492	3.49807	6.10188	5.57437	4.69225	5.04511	4.97287	5.54772
Vf	28	28	-4.56882	-4.67246	-5.8065	-5.49918	-3.95547	-3.10214	-7.90643	-4.19412	-3.33889	-1.69655	-4.00507		-5.1778	-8.13709	-3.74358	-3.92855	-4.96259	-4.94394	-4.55645		-3.42188		-3.42496	-6.3669	-7.96939	-4.55643	-5.63879	-5.64115	-4.15845	-6.573		-6.0074	-3.76317	-5.96036	-3.32274
Vf	28	30	1.77727	1.49079	2.35917	2.68528	0.56109	1.18751	-1.3604	1.51981	1.88206	-1.81711	0.802673	-0.352114	1.35687	-0.371675	-0.660146	1.589	2.79441	0.418156	1.75571	-3.48324	1.10365		1.21651	1.07753	4.47697	2.06182	-0.228921	1.26637	1.40859	2.45828	0.92818	3.50528	1.83864	2.22808	3.26698
Vf	28	32	-0.0292273	-2.45249	-0.0814286	-1.42303	-2.88487	-0.66382	-5.52801	-2.5472	-1.43363	-3.23081	-1.93116	3.45325	-4.9144	-8.64063	-6.35165	-3.19401	-1.51447	-3.09478	-1.54461		-2.24006		-1.95326	-3.33905	0.412559	-1.61515	-4.23533	-2.92819	-1.84023	-1.77763	-5.13552	-0.192957	-1.69216	-2.34616	-1.17894
Vf	28	34	5.06016	5.3842	4.65967	5.93832	5.36043	3.42951	6.57338	5.39753	4.26008	1.35183	3.22141	3.57743	5.29766	5.74716		3.61095	6.1256	4.53108	5.44973		3.64898		5.01601	5.9969	7.60853	5.82258	5.11318	5.73773	4.15668	6.93194	4.76344	6.55334	5.62196	6.52004	6.41682
Vf	28	35	5.06979	2.41231	3.0283	3.49067	5.09944	1.26314	2.83138	1.9021	1.28957	-1.35137	1.34139	3.25565	5.21406	5.79139		3.56526	3.90171	0.426975	2.00763		0.713714		1.85062	3.33387	7.61144	6.24608	4.98213	1.90214	2.32598	4.13273	4.80022	5.80962	3.45016	2.95485	4.66272
Vf	28	37	-5.16596	-2.82072	-0.5828	-2.2529		-1.51774	-8.07991	-2.87095	-2.30772	-2.83445	-3.84838				-6.75585	-2.35843	-2.00315	-3.46008	-2.94673		-3.48134		-1.14372	-7.29351		-0.694187		-4.74506	-2.37187	-2.70608		-3.9129	2.34062	-2.42139	0.851353
Vf	30	10		-3.83204		-4.62512	-4.58943	-1.69281		-3.60447	-4.26823	-0.751506	-3.07807	-4.17685			5.47033		-4.61684	-3.30057	-4.54912	-3.91099	4.34657		-3.30242	-4.90281				-4.86967	-3.90968	-4.64445		-6.43037	-3.53939	-4.32933	-4.2868
Vf	30	15	5.48688	6.48731	4.40313	6.64785	6.20901	-0.113434	8.82231	6.5345	1.71601	1.88586	3.5984		6.96197			5.10546	2.9333	5.70672	5.47882	-0.0697746	3.88411		2.03159	6.72582	9.91424	5.16797	6.17996	6.36142	4.09341	7.32426	5.33713	7.83337	5.77026	5.94113	6.36111
Vf	30	17	-0.67985	-2.35498	-4.06841	2.19528	3.71003	-1.19025	6.41172	-2.22701	-2.66325	1.5431	-1.8665	-3.42014	7.4527		6.06209	-3.70944	-2.25027	-1.19759	-1.19611	-2.42739	-1.47186		-1.58664	0.482341		2.90938		-1.83733	2.45598	0.404264		-2.74	0.563234	-2.76284	-1.71876
Vf	30	18			-3.0705			-1.54335			-2.57051	0.307943	-2.38478					-2.45409	-4.80481	-2.59408		-2.60479	-2.78812		-2.77249						-3.68132			8.7971	4.25655
Vf	30	20	3.74463	-2.68036	-4.3281	-3.27442	1.62585	-1.31021	5.95831	-2.48999	-3.69826	0.63268	-2.75368	-3.90545	6.48155	-6.9921	6.97646	-3.86404	-3.14234	-2.38258	-3.11495	-3.16246	-2.77638		-2.73828	-5.47566		-0.437903		-4.17661	-4.15488	-2.91152		-2.51289	-0.43837	-3.74622	-4.03603
Vf	30	22		7.10166				-0.592162		-3.42254	-2.48073	0.832351	3.10068					4.7003		-2.83502	0.652024	4.33481	4.61368		-2.37053									9.99758	0.65991	-3.76579
Vf	30	23	6.13609	2.01813	-3.13939	4.82947	5.36827	-0.999863	6.92493	1.27735	-1.99712	1.52104	-0.305233	-3.71121		-4.6701	5.78151	-1.28218	1.72581	-0.430312	0.415828	-1.52154	3.78353		-0.72333	-3.41195	7.07436	-1.80216	5.00612	0.944212	3.58513	3.66099		-3.05628	1.9488	2.09671	3.52739
Vf	30	24	2.27234	0.60254	-0.645488	2.12152	5.21249	-0.434966	1.35938	0.369732	-1.46247	0.91468	0.287675	-0.348038	5.29846	-1.92268	4.97884	2.12769	0.94768	0.299925	-0.323312	-1.48143	3.71608		-0.198856	2.86879	6.50226	3.81994	4.04986	0.973539	-0.0265424	0.686844	5.78325	4.40315	1.53716	0.591846	1.73486
Vf	30	25	3.0022	1.03513	-0.794166	2.62657	4.64286	0.167837	5.55292	0.79711	-1.43791	1.8687	0.460489	0.491	5.05387	-4.19491	4.49243	1.14756	1.82574	0.466796	0.512014	-3.84981	1.71522		0.55962	4.97587	8.01849	3.6602	4.89897	2.3124	1.10304	2.53957	4.80777	2.24601	2.53836	1.07355	2.97461
Vf	30	26	5.4144	0.965588	-1.92268	5.35658	4.67883	-1.08128	7.63859	0.662434	-1.25806	0.39975	0.25226	4.2864	-1.58556	-0.60706	7.05761	-0.109301	-0.139712	-0.0443112	-0.946697	3.61794	4.1456		-1.47453	4.65547	7.56754	3.42809	1.79879	2.71446	0.43209	-0.821497	3.88213	2.89686	1.44447	1.2767	2.62895
Vf	30	27	4.73133	1.87713	0.109089	3.34478	5.45207	0.0363871	6.96256	1.58369	-1.09943	2.49333	0.243547	3.69614	5.47244	-2.16056	2.07692	0.705878	1.34484	1.25117	1.79722	2.99533	-0.243596		0.952444	5.67506	7.44607	5.19625	4.31024	3.71398	2.91292	3.85203	5.54769	1.94151	4.65023	2.61026	5.3955
Vf	30	28	-4.70864	-4.54882	-4.65119	-5.5103	-3.98036	-3.85729	-6.62291	-4.55859	-3.87205	-0.14334	-3.21999	-3.5468	-5.39284	-6.57376	1.54338	-3.71057	-5.96995	-4.62741	-5.40141		-2.98612		-4.06014	-5.09082	-8.16756	-5.00164	-5.18724	-4.76288	-3.75878	-6.29003	-4.71595	-5.69289	-5.25144	-6.00622	-5.56575
Vf	30	30	-1.76994	-1.65705	-1.33565	-1.48076	-1.76935	-0.840901	-2.42184	-1.92994	-1.3772	-0.598489	-0.658754	-2.04911	-2.8142	-4.28063	0.0810508	-1.27418	-1.76692	-1.75836	-1.62055	-0.970217	-0.861129		-1.03902	-1.25702	-1.76367	-1.74467	-2.66991	-0.890168	-0.992571	-1.8752	-0.656828	-0.908339	-1.10027	-1.63029	-1.46895
Vf	30	32	-3.64864	-4.71283	-4.69555	-4.44032	-4.3887	-2.1375	-5.51081	-4.86097	-3.71045	-2.60197	-2.60187	-3.64123	-7.69346	-7.08004	-5.97191	-3.3946	-5.01672	-4.23887	-4.25021		-4.17839		-3.60301	-4.5244	-6.9042	-4.84672	-4.22424	-4.29509	-3.02065	-5.29975	-5.04064	-4.75092	-4.18887	-4.98238	-4.93153
Vf	30	34	5.73996	6.06704	4.62827	5.76079	6.30132	1.73568	7.64788	5.90636	3.98387	2.05687	3.52026	4.08784	5.7931	5.7415	1.69694	3.19818	5.76666	4.65763	4.24642		3.36391		4.75913	6.69276	8.23367	6.15087	5.69128	6.36758	4.17509	6.9631	5.64206	6.81889	5.46234	6.11896	5.78152
Vf	30	35	4.23418	-0.7829	-0.916436	-0.0876373	1.90097	-0.522478	-0.506276	-1.50933	-1.05653	0.0188049	0.111249	3.91113	-2.9006	7.3738	1.40636	0.375672	-0.929101	-1.51221	-1.19013		-1.13329		-0.573097	-0.571315	4.74202	3.21114	5.56022	-0.584857	-0.595525	0.478389	5.67884	1.61987	0.13191	-0.848217	0.623775
Vf	30	37	-5.0872	-4.96803	-3.79984	-5.4084	-2.39243	-2.77405	-3.9674	-5.02854	-3.94505	-1.9189	-3.25086		4.91463	-4.87367	-4.17264	-2.06613	-4.53542	-3.64106	-4.84469		-3.90367		-2.80974	-6.30688		-3.92045	-5.322	-5.55116	-3.57533	-5.7711		-3.11261	-1.57418	-5.20542	-3.99037
Vf	32	10		-4.05882		-4.96554	-4.37569	-1.76931		-1.3926	-4.21811	0.703413	-2.50948	-4.18169	-4.59457		6.52202	-3.11577	-1.89019	-1.41518	-4.22422	-3.39097	4.20218		-2.88278	-4.55347				-4.78321	-3.65596			-5.76896	-3.27368	-4.18174	-3.70784
Vf	32	15	5.31563	6.35558	5.47	6.83244	5.9337	2.75482	8.83573	5.98508	2.98704	2.94302	3.59309		9.03479		7.39568	4.95017	7.06024	6.05542	5.70134	2.86181	5.35276		3.89409	6.51555	10.1175	4.84089	6.18968	6.29492	4.0484	7.56058	5.26145	7.66037	5.67511	7.41574	6.43989
Vf	32	17	-2.46153	1.8608	-4.216	4.85481	3.5566	1.36056	6.98454	2.39842	-0.35219	3.13093	0.4323	-3.15865	8.64251		7.78069	-4.28735	2.02574	2.27289	2.84714	-2.54054	1.61672		1.08293	5.95014		0.475021		4.72429	3.66011	4.75343		-6.48889	2.73822	1.25382	2.12189
Vf	32	18									-2.71491	-0.682633						-3.23768					-2.87393		-2.91369
Vf	32	20	3.30461	1.50721	-4.0898		4.68555	0.355886	6.54731	1.74094	-3.64495	1.9506	-2.496		5.04714		8.02815	-4.04118	1.60589	1.07508	-0.0203959	-3.03591	0.253495		-1.40275			-1.62587		-1.92427	-3.93486	4.03163			0.767555	0.1553	-0.509002
Vf	32	22						1.57695
Vf	32	23	5.96484	4.41554	-2.2635	5.04092	4.98854	1.24111	6.88854	4.29856	0.695972	2.98799	3.3694			7.4362	8.09121	0.377204	6.32387	3.15518	3.34822	-2.49383	4.95753		2.65413	-1.14294	7.27764	-3.77679	4.8896	5.83107	4.22446	6.08569		0.648161	4.1075	4.55516	4.9318
Vf	32	24	4.17091	4.14182	2.37262	4.54773	4.93951	1.76795	5.27583	4.1852	0.48778	2.71699	2.03779	1.94631	6.94413	6.45	5.39063	3.02432	4.91612	3.55294	3.2295	-1.26964	4.75621		2.80673	4.51721	7.57902	3.93755	4.88501	4.64217	3.05383	5.06142	5.66919	6.63861	3.82657	4.45765	4.20584
Vf	32	25	4.00816	4.37414	2.3336	4.52637	6.05341	2.62319	7.01438	4.46439	0.419364	3.09678	2.29567	3.11146	6.96046	7.55327	4.57031	1.2454	5.1135	3.69735	3.48193	-3.94294	4.58788		3.02176	5.84238	7.93319	4.32622	5.33672	5.32356	3.54145	5.80635	5.45655	4.8862	4.48243	4.81684	4.97149
Vf	32	26	5.3175	4.16838	-0.615333	5.72869	5.4003	2.11323	8.20321	4.22358	0.17978	2.18515	2.92614	5.04352	5.83098	8.42781	2.38042	1.50297	5.72718	3.40928	2.50923		4.66979		1.87337	5.9817	8.84868	4.09475	4.43319	5.78213	3.42809	5.93669	4.34179	6.721	4.36486	5.30049	4.76594
Vf	32	27	4.56327	4.3297	2.52387	4.38622	4.99002	2.09936	7.07762	4.37404	0.701827	3.73099	1.37966	4.27195	6.90198		4.47266	1.31886	4.01233	3.59737	3.80344		2.94167		2.73582	5.5868	6.8144	4.64206	4.85282	4.93276	3.53017	5.72651	5.55126	4.52198	4.96303	4.83084	5.65509
Vf	32	28	-3.52958	-3.71352	-4.96427	-4.88586	-4.48327	-2.80424	-5.89394	-1.99336	-4.14642	1.51444	-2.84144	-3.85891	-5.44691	-3.93422	-1.61744	-4.3717	-4.83302	-3.45311	-4.55145		-0.9956		-3.57313	-4.84613	-7.00207	-5.38206	-4.88902	-3.92708	-3.31092	-5.72145		-6.1918	-5.02703	-5.56954	-5.26726
Vf	32	30	0.156424	2.3131	1.00245	2.14034	1.90927	1.08842	1.9615	2.37819	0.89763	1.09202	0.814462	-3.09207	1.39022	7.27828	1.83499	-0.71303	2.67913	1.79974	1.69824		2.51625		1.72396	1.89578	6.26105	0.632597	-0.250391	3.06522	1.91362	2.72741	1.30972	1.48739	2.03312	2.45579	1.58907
Vf	32	32	-2.81586	-1.80137	-5.25092	-2.2994	-2.11917	-0.626358	-1.57493	-1.64789	-2.4965	-1.09138	-1.96933	-4.64238	-5.43256		-6.38283	-3.42945	-1.5605	-2.0849	-1.7754		-1.55822		-1.36365	-2.00455	0.727704	-4.47716	-4.43988	-0.6261	-1.08594	-1.80679	-4.8133	-2.6199	-1.44836	-2.06375	-2.72159
Vf	32	34	5.58713	5.92392	5.20867	5.73597	5.96549	2.94005	7.87523	6.0212	4.72528	3.1047	2.83615	4.38704	7.94306		1.42396	3.19723	5.53874	4.87614	4.7532		4.72961		4.77295	6.36327	7.11496	5.9097	5.70924	5.89237	4.05436	7.36172	6.08319	6.38016	5.4943	6.11957	6.24698
Vf	32	35	4.47351	3.45465	3.207	3.2402	4.54309	1.20285	3.79249	3.48487	1.8172	1.94812	1.67225	4.06526	1.26226	6.90043	-0.554625	0.738736	3.60707	2.29123	2.14328		2.4171		2.43477	3.17124	7.10158	4.38459	5.57819	3.18966	2.27498	5.32719	5.73705	5.25317	3.34379	3.73764	3.55217
Vf	32	37	-4.577	-2.22426		-5.39229	-1.56484	-2.55407	-1.36826	-2.18203	-2.6892	-0.537061	-2.66152		4.17274		-3.47974	-3.28505	-1.67094	-2.0478	-3.28406		-1.93322		-1.00119	-5.61323		-3.17254		-3.49045	-3.42588	-4.43865		-4.86897	2.66219	-3.65271	-1.91078
Vf	34	10		-4.39015		-6.37663		-2.93614		-4.39175	-4.55514	-2.07053									-6.89048	-4.00974								-7.02688	-4.41278
Vf	34	15						-2.52708				-0.165606											-3.54379
Vf	34	17		-3.89391	-5.19			-2.18332		-3.86448		-1.59118									-5.04585	-2.76932	-3.31687							-5.30306						-5.51819
Vf	34	18						-1.98182															-3.34273
Vf	34	20		-4.3148	-4.523			-2.04489		-4.28923	-2.95152	-1.63344									-5.16184	-3.1888	-3.02192							-5.82505	-4.73937
Vf	34	23			-4.572			-3.21194			-3.17813	-1.59434									-5.09313	-2.72261				-6.92472				-5.62376
Vf	34	24		-6.53947	-6.274	-6.88284		-2.23118		-5.47512	-2.83617	-1.99721	-4.13462						-4.50852	-2.2861	-4.72326	-1.96351	-3.32821		-3.13951	-7.79094	-8.15884			-7.79263	-5.02315	-3.45548			-2.15681	-6.02662	-3.451
Vf	34	25	-4.74084	-5.22496	-5.33631	-6.25037	-4.65002	-2.57711	-6.31378	-5.05676	-2.98928	-0.73547	-3.60245	-3.972	-4.54526	-6.75138		-3.47342	-3.5956	-3.11054	-4.57584	-4.60865	-5.69495		-3.53829	-5.91756	-6.79907	-4.53409	-4.65951	-5.66924	-4.01382	-3.05812	-5.14728	-6.83953	-3.44538	-5.24658	-6.0675
Vf	34	26		-4.12196				-2.44567	-6.74133	-4.21188	-4.33313	-2.6016							-3.8411	-3.0601	-4.62173		-2.7884		-4.31219		-7.07368			-3.85533		-7.25917			-4.54228	-3.80981	-4.26731
Vf	34	27		-3.47812		-4.94994		-1.29925		-3.24077		0.893466									-4.32545		-2.83748									4.30425			3.33693	-3.26968	3.62862
Vf	34	28		-5.54608	-5.971	-8.04566		-5.27904		-5.71339	-3.78274	-2.54311	-3.80041						-7.58793	-5.51906	-7.85007		-4.82572		-5.25624	-7.72829				-7.06602	-4.1593	-8.65284			-5.96835	-6.67475	-7.40674
Vf	34	30		-6.73377	-6.13467	-7.3947		-3.17358	-7.86061	-6.89093	-4.21043	-2.99088	-3.97266					-5.50513	-7.11794	-5.18338	-6.68965		-4.64245		-5.04024	-8.60239				-7.7753	-4.46951	-8.41902	-7.08071		-5.6516	-6.80526	-7.0957
Vf	34	32		-6.3446		-7.34203		-3.30954	-8.15866	-6.56907	-4.01876	-3.73388						-5.34984	-7.63136	-5.04001	-7.56959		-5.52931		-4.49785	-8.1764				-7.29765	-4.4245	-8.33697	-6.82922		-5.50393	-6.61206	-6.98875
Vf	34	34						0.0149005				1.52899											1.36172
Vf	34	35		-6.40642		-8.08462		-2.40107		-6.79183	-5.11272	-1.94931							-7.40209	-6.19195	-8.38481		-2.9686		-5.23773	-9.18462				-9.08968	-4.60106	-7.39448			-1.27308	-6.87828	-7.07738
Vf	34	37		-7.65122		-6.9128		-3.62052		-7.95899		-3.12504	-3.06856						-6.41154	-4.62219	-7.17763		-4.85106		-4.78883	-9.30566				-9.17482	-4.26441	-9.02235			-5.59709	-7.38274	-7.56801
Vf	35	10		-4.20287		-5.01712		-1.56454		-3.99126	-4.74761	-1.46191	-3.48201						-5.22658	-3.4735	-5.47202	-3.90391	4.31426		-3.63303	-10.2192				-5.76815	-3.95956		-7.21532	-7.61414		-4.45619
Vf	35	15		5.75341	6.169	7.33777		0.874258	9.25031	6.04203	4.36715	0.00654255	4.05641						1.31215	4.92212	1.77082	3.15102	5.46484		4.3186	-1.27927	10.9615		5.78813	7.27245	4.22496	7.00721		7.48885	5.79512	6.1211	6.52853
Vf	35	17		-2.8583	-4.072	0.231885		-0.556004		-2.9605	-1.04833	0.980177	-2.0177						-2.35442	0.0778623	-0.877987	-2.81168	-0.281667		-1.01805	-1.51104				1.338	3.83667			-7.02926	4.12991	-2.17443	4.87149
Vf	35	18						-1.1242				-0.725593	-3.18613						-4.43048		-3.49264		-1.82183
Vf	35	20		-3.57765	-4.495	-4.99792		0.270406		-2.70237	-3.45183	-0.386236	-2.72347		9.02878			-3.25203	-4.25047	-1.49413	-4.38455	-3.00107	-0.768028		-3.20576	-9.44258				-3.96145	-4.3598			-7.06678	4.05459	-4.14201
Vf	35	22										-1.57138	2.01265							-2.45411	-3.27647
Vf	35	23		2.5451	-4.544	5.13427		-0.416027		1.64312	-0.259392	0.698173	-1.19875			-6.98951		-2.9649	-0.22499	0.332893	-0.406642	-1.36005	5.06961		-0.353261	-10.6996				6.8086	4.40102	5.53232		-6.51968	5.69494	6.23603	5.02111
Vf	35	24	1.37264	-0.916892	2.81289	1.2993	5.82229	0.356128	1.57234	0.0196213	1.27651	0.44107	0.308674		3.37285			2.35182	1.62449	1.36673	-1.33194	-2.14505	4.40632		1.08024	2.59699	5.7821	5.43707	5.21509	3.08262	1.81373	0.609279	1.87773	4.20992	2.55586	2.84532	3.89457
Vf	35	25	-0.473408	0.502242	1.87765	1.63478	5.12769	1.09661	3.93796	0.561816	1.44239	1.15501	-0.131881	-3.65023	5.62524	-6.76666	-3.86684	0.910763	2.67284	1.70182	-0.425246	-4.34968	3.04553		2.20193	3.54931	8.58185	3.76086	3.44453	3.56442	2.57822	3.78038	-0.185259	2.44518	3.73965	4.10736	5.02567
Vf	35	26	5.56745	0.260965		0.891987	6.05702	-0.645726	0.91099	-0.321706	0.434986	-0.201121	0.300246		2.50091		-3.19377	2.0917	-1.15861	1.38271	-2.33375		4.5714		1.12662	3.04714	2.42068	5.75716		3.99941	3.94559	0.117165	6.34236	5.29435	3.48097	2.5928	1.15662
Vf	35	27	5.23927	1.66741	3.1	2.33124	5.34885	0.626286	7.18413	1.73714	1.61027	1.87635	-0.659442		7.39281		-7.02625	0.0363998	1.31096	1.62954	0.61565		0.797234		3.09169	5.64175	10.508	4.87593	5.28348	5.56985	4.05153	6.11307	6.72621	-1.92353	5.31045	4.68459	5.79587
Vf	35	28	-5.3066	-8.63928	-5.12333	-6.87208		-3.44606	-7.60794	-7.78252	-3.42368	-1.30924	-3.83278		-5.521		-5.12112	-4.08435	-5.44049	-4.22164	-6.90924		-2.97178		-4.22096	-9.05547		-5.73103	-4.97439	-6.2888	-3.77556	-7.61351	-7.28387	-7.48942	-5.75081	-6.50384	-5.17812
Vf	35	30	-4.79484	-3.72926	3.09475	-1.84481	-2.75628	-0.119033	-3.01667	-3.53268	2.2613	-1.35232	-1.61252		-1.99292		-4.89158	-4.05404	0.147194	-1.1604	-1.94629	-3.4134	0.469814		0.101148	-2.27468	10.9636	-4.47704	-4.74334	-0.475177	0.147325	-2.17543	-4.79911	-2.37066	-0.0285443	0.651913	1.25316
Vf	35	32	-5.29351	-7.7101	-4.855	-5.42017	-3.19377	-1.91211	-5.9378	-7.5821	-1.12805	-3.06952	-3.23978		-8.1664		-6.42632	-5.39327	-4.04936	-3.64885	-4.72059		-3.05035		-2.84098	-8.44239		-5.58758		-4.86394	-2.44295	-6.41976	-8.1772	-5.44313	-3.6772	-3.75392	-3.2026
Vf	35	34	5.02828	5.23842	5.944	5.99849	5.1752	1.98591	8.86304	5.4329	5.38913	1.94805	3.62801		9.77822		-2.83812		5.26663	5.10227	2.97615		3.538		4.75964	6.30837	10.4715	5.31584	5.42697	6.34611	4.35843	6.73039	5.91528	7.05304	5.07933	6.60701	5.86869
Vf	35	35	4.97012	-1.76904	5.7785	0.895124	5.03916	0.415166	-0.135367	-2.18923	1.9233	-0.702248	0.590442		-0.153469		-3.1287		1.89989	-1.3073	-1.86759		0.561622		0.370646	1.65128	10.2201	5.59501	5.29592	0.474527	0.782195	2.8548	-1.02862	2.26103	2.74901	2.08357	3.32865
Vf	35	37	-6.02033	-7.9862		-6.24379		-2.4812	-7.19715	-8.12185	-1.34745	-2.58562	-3.65687				-8.31709	-2.60425	-3.13053	-3.2081	-5.68898		-3.32804		-1.09499	-10.5983		-5.96066		-5.70993	-3.62766	-8.10326	-7.27108	-5.8987	-0.4257	-4.09139	-0.838241
Vf	37	10		3.97604				1.91101		3.91163	-4.03666	2.6027									0.587672	-3.65437	3.66127							-4.26819
Vf	37	15	5.84277	6.46362		6.16595		3.69655	8.66191	6.62319	4.32532	2.99475	3.74745						6.44278	4.29275	5.23633	3.66591	3.91346	3.85277	5.18221	7.43186			6.1839	7.3576	3.78119	6.8559		5.83993	5.54492	6.40993	6.55167
Vf	37	17		4.67209				2.96617		4.94115	3.83449	3.79159	3.38813				7.98754		5.1924	4.04411	5.36198	-2.48026	3.32736		4.51216	5.93764				5.75672	3.50002	6.14612			4.21669	6.23173	5.36211
Vf	37	18		5.77461				4.39126		6.09904		2.96019									5.79979		4.04035		4.14813					5.79195						5.1112
Vf	37	20		4.68153				3.77354		4.93139	-2.73066	3.09545					7.48269		5.94452	2.42348	4.79312	-2.83343	1.85435		3.91347					5.56331	-3.70939	4.71492			4.14136	5.11773
Vf	37	22					28.6046					1.14847	4.33408								4.59061
Vf	37	23	6.49198	5.97824	-1.331			1.82662		6.16168	0.975587	3.11511	3.74226				8.77151		6.02185	4.24425	5.17543	0.467357	4.10557		4.99714	6.17478				6.89374	3.95725	7.16019			5.44474	6.74049	5.51174
Vf	37	24	5.51591	4.94561	4.0972	5.08384	6.19847	3.2367	8.21879	5.10754	3.12898	2.75102	3.59239		4.51528	4.08729	7.81049	3.71004	5.46563	3.61753	5.02607	1.94251	4.09767	3.87969	3.86099	6.91116	6.24218	6.21149	5.56271	5.68806	3.49414	7.05175	5.17923	7.43893	5.28947	5.41664	5.61789
Vf	37	25	5.81722	5.82045	3.33642	5.55372	7.98923	3.90866	8.41224	5.73309	2.83795	3.22935	3.55967	2.01178	0.300129		7.2633	3.63095	5.91619	4.05827	5.08677	-2.89693	4.07722	4.18138	3.6976	6.94979	9.82421	6.34266	6.26801	6.40917	4.16841	6.79158	6.19343	5.81184	5.31001	6.21146	6.44511
Vf	37	26	6.31459	5.92436		6.12017	7.34015	2.84172	8.14667	6.11757	5.09552	2.77127	3.97865		-6.79804				6.34956	4.49489	5.7154		4.02385	4.60018	3.92709	7.82306	9.82473	6.7828	5.68667	6.66029	4.28665	6.59207		6.77689	6.04382	6.24138	7.17246
Vf	37	27	5.97475	5.63163	3.68733	5.82377	5.48598	3.29217	7.46212	5.8051	4.30769	3.24254	3.19306	2.37126			6.9784	2.46226	4.86747	3.86937	5.01306		3.35401	3.60327	3.70619	6.08072	6.66149	5.73017	4.86761	5.91156	4.09684	6.60432	5.08931	5.46216	5.08449	5.97214	6.42888
Vf	37	28		-1.73138		-5.77073		-1.35093		-1.73977	-3.25761	2.73329	-2.72512		-7.37934		6.39064		-4.94342	-4.29903	-5.71752		-0.543889		-3.96496		-7.17024			-5.00746	-3.11684	-6.17784			-4.71229	-5.66465	-5.32049
Vf	37	30	4.78856	3.15747	3.84675	2.47739	-2.30767	2.98637	2.67567	2.89984	3.50916	1.46276	2.59852		-8.1618		7.29067	0.527903	3.50483	1.51322	3.91013		3.17124		2.82404	5.84734	-6.62993	5.75934		4.356	2.95054	3.92464	5.73944	0.669348	3.18078	4.04144	2.36062
Vf	37	32	5.72519	-1.07406		-1.45975	-4.78029	1.3052	7.8619	-1.56452	0.405079	-0.708339	3.02908		-10.1079				-0.463056	-1.55267	0.857934		0.247446		-0.167279	7.01326	-6.83322			-0.000905409	0.0940855	-0.46709		-5.84091	-0.727612	-0.22958	-2.77161
Vf	37	34	6.27901	6.85103	3.577	5.91542	5.54112	3.88607	6.49442	6.9726	4.35331	2.94414	3.0869	2.48635				2.41419	5.20691	4.19607	5.73997		4.36254		4.55123	6.6404	6.62491	7.06162	5.82274	6.70287	4.06662	7.32639	5.17707	5.40412	5.25373	6.91377	6.54316
Vf	37	35	6.04558	4.84863		4.26014	5.40508	3.18417	6.1459	3.5264	3.00179	1.98584	3.43157		-10.709			2.3893	4.36408	2.08578	4.4514		3.43326		3.45666	6.87688	6.37354	5.91601	5.69169	4.48786	2.73643	7.16652	4.27186	5.29628	3.86444	4.95638	4.3993
Vf	37	37		-2.30907		-5.54229		0.0175996		-2.40744		-0.436732					5.95886		-0.350501	-0.811172	-0.961194		-0.994268		-1.47808	-5.77097		4.27139		-2.63199		-6.54735			5.10216	-2.18896	-0.506181
VMf	10	10						3.056				2.61296								2.87157	2.29422	1.81936	3.08903		1.84135
VMf	10	15						-3.06				-2.54275								-2.65961	-2.2566	-1.52284	-3.34035												-2.81845
VMf	10	17		2.60123				2.734		2.78871	2.54664	2.9554						3.94756		3.25367	3.06437	2.01006	2.16405													3.35247
VMf	10	20		2.61174				2.88867		2.60753		2.73268								3.11802	3.31323	1.77691	2.11346
VMf	10	23		2.66997				0.288		2.79111		2.50478								2.76125	3.16925	1.96361	2.54666		2.04597												3.65469
VMf	10	24						-0.7614		2.57706		-0.939912								-0.22123	1.02165	0.340851	0.739744	-2.66407	1.90461									3.98265	-3.40898	2.8556
VMf	10	25	-3.95541	0.940573		-4.1277		-1.24785		0.232812	2.44272	-0.84543			4.99736		-1.54277	3.3587		-0.149637	0.492246	-1.07308	-2.69855	-2.74514	1.63008	4.05703		-0.564049		2.58101				4.02607	-2.48161	3.2697	3.67188
VMf	10	26						-2.82567		-2.47878		-2.47716								-2.43565	-1.92526	-2.04357	-3.42859	-2.69281											-3.52145
VMf	10	27		2.19263		-2.82701		0.13775		0.792849	2.26277	1.0022					-4.19945	2.90393		0.979507	2.13402	0.587691	-2.75096		1.59876			3.69755		2.46418				3.60333	-2.77102	3.00817	3.24755
VMf	10	28		2.32862				1.75733		2.59427	2.93841	2.24748						3.43455		2.61673	2.30923	2.57567	2.47191											5.40603		3.10778
VMf	10	30		2.45077				0.6171		2.59106	2.92423	-0.047326					-6.53852		-2.45187	0.171817	0.231097	1.45215	-1.00689		2.06212			3.9227		2.86497					-1.9628	3.02935	3.97147
VMf	10	32						0.684444		-2.66274		0.00167103						5.9916		1.30707	1.57719	2.66834	0.117502		2.26525					2.89832					-3.08371	3.71555
VMf	10	34						-2.9				-2.7816					-5.06237			-2.93866	-2.56528		-2.56028												-3.41132
VMf	10	35						-0.1535		-2.38432		-0.329256					-5.1891			-3.00514	2.64005	3.32269	0.0274552		2.33287							-2.6717			-2.67767
VMf	10	37		2.17639				0.81225		2.38603	2.67263	1.97667						3.17821	2.65164	3.04926	2.85488		-1.99838											3.57026		3.11468
VMf	15	10						1.984				2.25185										1.9685	3.0748
VMf	15	17						1.662				2.59429										2.25042	2.16268
VMf	15	20						1.81667				2.37157										1.94303	2.15816
VMf	15	23						-1.405				2.14367										2.1699			1.90832
VMf	15	24						1.23				1.87314										1.86674	2.81685
VMf	15	25			4.56476	4.16454		-0.2466			-3.13866	2.15076			6.17511					3.08567	2.33078	1.42284	-3.51497		2.04876	4.45536				2.64491	3.382				2.72829		3.5318
VMf	15	26						-1.621
VMf	15	27						1.461				2.42264			5.99603							2.20966
VMf	15	28						1.171				2.02677										2.97821	2.36601
VMf	15	30						1.378				1.96241										2.62239	2.43288
VMf	15	32						1.045				1.51362										2.9665	2.17537		2.12759
VMf	15	35										1.53878										3.4862	2.36533								3.37741
VMf	15	37										2.19088
VMf	17	10						2.88833		2.67341		0.871149	3.22576							0.773246		-0.206679	2.81883												3.43289
VMf	17	15						-2.738			-2.63329	-1.92085								-3.0417	-3.02675	-1.49691	-2.41537														-3.20387
VMf	17	17		2.76743				2.56633		2.94082		0.876503	2.85286							2.66272	2.49975	0.00980746	0.590833
VMf	17	18										-1.53276								-2.35411		-1.47878	-1.56409
VMf	17	20		2.77795				2.633		2.77784		1.0156	2.75093					-3.16721		0.64287	2.61439	-0.240758	-0.106019												2.89525
VMf	17	22									-2.8429	-1.40323			-10.3361		-8.50986			-2.2461		-1.2969
VMf	17	23		2.83617				0.49675		2.94321		0.388788								-2.36939	2.66541	-0.202773	0.565818		2.07947										3.25894
VMf	17	24		1.10104				-0.33995		0.0610243	-3.01634	-0.719439	2.36265	2.98403						-1.65325	0.465236	-0.724361	0.28984	-2.44712				-2.63479				3.87852			2.99343
VMf	17	25	-3.51066	-0.296362	3.85401	-3.50616	2.16442	-0.503267	-4.9784	-0.199664	-2.64076	-0.803672	2.20267	4.47616	0.694528		-7.05948	-3.36167	-2.44454	-1.43922	0.505667	-1.96516	-2.83141	-2.06918	-1.42586	1.97247		-1.44553	-5.04163	-1.62244	-2.0761	-0.936049			2.42725	-2.1059	-0.0336212
VMf	17	26	-2.98464	-2.52191		-3.16581		-2.69217		-2.43466	-2.98843	-1.4664		2.71693				-2.92576	-2.4023	-2.74918	-0.701181	-0.744969	-1.11462	-2.47586				-3.5331		-2.15958					-2.94065	-3.42837	-3.19438
VMf	17	27		1.35104		-2.83616		0.794647		0.914631	-2.4651	0.400779	2.37461		1.33494		-10.9904	-3.02007	-1.76715	-0.483335	1.78297	-0.389418	-1.05905					2.23427			2.67223				2.73692		2.42138
VMf	17	28		2.44407	2.52242			1.7294		2.35554	3.10973	2.08861	2.49031						2.9609	2.23345	1.97632	2.48416	1.64912			2.93025						3.72068			2.88222		3.02398
VMf	17	30		-0.355122	2.06452		3.68604	0.734944		-0.218294	0.486089	-1.16244	2.63571		-5.81892		-7.28136	-3.43243	-2.60732	-2.08916	-0.427425	-0.655658	-1.18623		-1.95759			1.03484		2.41605	3.00761	-2.75487			3.36221	-3.43762	1.67046
VMf	17	32		-2.53111			-2.32599	0.814333		-2.57924		-0.886501	1.52809	-2.30195				-3.04736	-2.43631	-2.33492	-0.0832804	0.49744	-0.84421		-0.274041			-3.62616		-2.94594	-0.551686	-3.36143				-1.46436	-2.68622
VMf	17	34						-2.505		-1.91056		-1.87459	2.42379		-4.61467		-5.10257	-3.06343	-2.01977	-2.48631	-2.56392	-1.92361	-1.47452												-2.56322
VMf	17	35		-2.4977		-2.63427		-0.14325		-2.25428		-0.966968	2.92813		-4.85748		-5.22929	-2.6732	-1.86526	-2.29567	-2.20095	1.31389	-0.124173								3.37135						-2.94712
VMf	17	37		2.3426				0.94875		2.53814		0.665967							2.88408	2.69697	2.28133		-1.36941												2.76359
VMf	18	10				2.95362		2.4262		2.64108		2.40309	2.77385							2.98417	2.24895	1.76832	3.09444												3.29093
VMf	18	17		2.69337		3.15186		1.54855		2.83353	2.73419	2.74553						3.55688	2.71002	3.36627	3.0191	1.95902	2.16946					4.11463								3.27412	3.32804
VMf	18	18						-1.1435
VMf	18	20		2.70389				1.54142		2.65234	2.57157	2.52281							2.5478	3.23062	3.09112	1.80067	2.01958	2.54805				3.6334				3.4323			2.64147		3.28512
VMf	18	23		2.76211				0.23675		2.83592		2.29491								2.87385	3.12398	1.91257	2.55207		1.79042										2.93042		3.78138
VMf	18	24		2.51109		2.89774		1.34623		2.62188	2.26944	1.90797							2.90417	2.91647	2.52643	1.71543	2.72401					4.03669				3.84136			2.88913	2.82482
VMf	18	25		2.74694	4.63307	3.15228	3.95303	0.309652		2.77473	0.153996	1.85247	2.57697		5.72903		6.13286	2.97658	2.68965	3.158	2.60976	0.0946333	-4.14425	2.66339	1.99422	4.11227		4.23208		2.51171	3.28135	3.56463			2.44593	3.21051	3.68983
VMf	18	26						-1.648				-1.47306																							-3.46629
VMf	18	27		2.23182		2.63268		0.245		2.29647	2.41363	2.57388			5.92091			2.72856	2.32781	2.96591	3.05057	2.02815	1.53997	2.11845				4.02236				3.23559			2.54966	2.89391	3.19703
VMf	18	28		2.42076		2.90618		1.65987		2.63908	3.14662	2.13899						3.04387	3.04958	2.72933	2.16231	2.65096	2.11933									3.69263				3.09239
VMf	18	30		2.54292	1.48282	2.88053	4.01804	1.77837		2.63587	2.8917	1.73707	2.54265		4.8494				2.81817	2.78632	2.67143	2.32555	2.26816					4.27565		2.39043	2.92178	3.4855			3.22025	3.03716	3.72299
VMf	18	32				2.87841	4.44523	1.76327			3.25456	1.59794							2.31633	2.71914	2.58266	2.74215	2.03015		2.11962						3.03028					3.41996
VMf	18	34						-1.136
VMf	18	35						1.85125				1.79389									2.59478	3.27165	2.47663								3.28553
VMf	18	37		2.26853				1.72667		2.43085	2.88084	2.02519						2.78753	2.97276	2.71507	2.51511		1.23156					3.80394				3.09417			2.43507	3.03633
VMf	20	10				2.98407		0.628556		-2.44238	-2.70544	-0.0366329						-3.36181		-0.0951222	-1.03745	-0.858128	-0.107942	2.69055	-1.83193					-2.27628					3.20678		-3.09648
VMf	20	15						-2.08171			-2.79209	-2.43971								-2.92638	-3.23552	-1.8095	-2.28298														-3.09901
VMf	20	17		0.125427		3.16481		-0.00104762		-0.453707	2.99695	-0.334371	-2.90146		5.72114			3.93525		0.0588788	-0.197514	-0.77778	-0.895744	2.4736				4.03672				-3.84171			-2.84371	3.69065	3.20417
VMf	20	18		-2.44904		-3.0271		-1.5365		-2.4872	-2.78454	-2.33708			-4.55921			-2.92969		-3.04202	-3.0251	-1.77401	-2.07345					-3.67554				-3.80456			-2.61051		-3.22318
VMf	20	20		2.71874		-3.01021		0.86564		0.932224	-1.33838	-0.258771			0.0956867			-3.3495		0.377872	-0.844067	-0.527184	-0.485658	0.115741				-1.15702		-2.1995		-3.45215			-0.426913	3.18435	-0.394644
VMf	20	22						-1.16			-3.22124	-2.84176			-10.1827		-9.72016			-2.61621	-2.72682	-1.5024	-2.07049
VMf	20	23		2.77696				-1.19075		0.228543	-1.08748	-1.19284								-1.28962	-1.78703	-0.99189	-1.27315		2.05411			-3.62472		-2.2524		-3.89161			-1.26096	3.32468	1.10361
VMf	20	24		-0.344721		2.88085		-1.06683		-1.01648	-2.16847	-1.77805			-4.38381			-2.40702		-2.08836	-2.35566	-1.09103	-1.3019	-2.21462				0.81744				0.25816	-2.67046	3.8032	-2.132	3.16835	-2.95497
VMf	20	25	-3.32832	-1.7617	-0.0600424	-1.5602	1.29495	-1.44558	-4.14271	-1.80412	-2.25781	-1.8783	-2.47567	0.696399	-3.31317		-4.38352	-1.91802	-2.92884	-2.07642	-2.35953	-2.15762	-3.265	-2.08559	-1.18029	0.111694		-2.0126	-5.19621	-1.58755	-3.02028	-3.48751	-3.63921	3.84662	-1.86784	1.88972	-1.20276
VMf	20	26	-3.2305	-2.5872	-2.55975	-2.37932		-2.00779		-2.61405	-2.80291	-2.49858		1.93164	-4.3548		-4.35979	-2.94615	-3.22383	-2.83122	-2.93357	-1.93363	-2.39966	-2.67579		-2.82106		-3.58791		-2.4254		-4.30411			-2.99215	-2.92207	-3.06246
VMf	20	27		1.09699	-2.33637	1.4449		-1.17823		0.579133	-0.833431	-0.77495			-1.84352		-8.5634	1.47144		-1.12353	-0.535108	-0.803073	-1.14635	2.38193		0.237658	-7.73442	2.53282		0.221266		-2.75633		3.42387	-0.434632	3.13901	2.30503
VMf	20	28		2.43561	2.20026	2.8893		1.12077		2.61827	3.05968	2.15996					-4.84358	3.07608	2.58063	2.59077	1.31499	2.39592	1.73249											5.22658		3.44596	2.52522
VMf	20	30	-2.86543	-1.61521	0.681909	-0.734709	3.71392	-0.540123		-1.8841	-1.44878	-1.9011	-2.43461		-4.33151		-7.71084	-2.88353	-1.24861	-2.18743	-2.52354	-1.14758	-1.47508		-1.94909	-0.976495		-2.31646		-1.56928		-3.21992	-3.60185		-2.38293	1.19818	-1.07699
VMf	20	32	-2.52218	-2.98663		1.15859	-1.96914	-0.0674348	-2.78318	-2.87649	0.551892	-1.27245	-1.99889	-2.2096				-1.00246	-2.28776	-1.40794	-1.42378	-0.0826179	-0.95803		0.420703	-2.67922		-3.02474		-2.03254	-2.62348	-3.52096	-2.84367		-2.6804	1.66455	-2.98061
VMf	20	34						-1.83743		-2.44606	-2.35005	-2.43722			-4.02025		-5.76399	-2.43624	-1.85755	-2.88393	-2.70517	-1.91916	-1.48677												-2.77614
VMf	20	35		-2.31186		-2.18075		-0.642		-2.14585	-2.63877	-2.00931			-4.48611		-5.89071	-2.3998		-2.70295	-1.9633	0.0527157	-1.09503							-1.77462		-2.67751			-1.97144		-2.85652
VMf	20	37		2.28339				0.170818		0.74707	0.133788	-0.0707172					6.21198	0.914565	2.5445	0.507377	0.360138	-1.9575	-0.678031	2.22888				0.121356							-1.16458	4.23304
VMf	22	10						1.14933				2.63			11.9685		9.07982			2.38244	2.1532	1.42352	2.90496	2.40457
VMf	22	15						-1.187									9.09622
VMf	22	17						0.902833		2.29469	3.94801	2.97244	-2.97895		10.3536		9.16445		3.34938	2.6943	2.7299	1.61423	2.08451
VMf	22	18						-1.25			3.16813				10.8349		9.47463
VMf	22	20						1.264		2.16814	3.45704	2.59215			10.1494		9.65649		3.18716	2.67727	2.91658	1.54623	2.16007	2.50329
VMf	22	22						-0.885
VMf	22	23						0.001			2.78047	2.52182			11.9314		10.2458		3.38501	2.76584	2.94757	1.56778
VMf	22	24				3.29505		0.8314			3.20841	2.39179			10.9242		8.58095		3.44595	2.51146	2.64281	1.42076	3.03381
VMf	22	25	3.04454	-0.136072	-3.80696	3.20603		0.105279		0.795735	2.03641	2.02934	-2.54082	4.86504	9.79738		8.74716	-3.26011	3.57969	2.50969	2.62984	-0.861826	-8.73685	2.55554		4.32021		4.57397	-4.9432	-2.44468	-2.50777				2.94712	2.72615	3.65778
VMf	22	26			-3.69421			-0.312857			2.54259	1.53718			9.96008		8.12097		3.4971	2.046	2.36592	3.50509	3.16891
VMf	22	27			-3.77868			0.805091		1.87871	2.85906	2.80079			9.04464		7.2596	2.7791	2.96717	2.28196	2.59682	1.84098		2.07369		3.385		4.33605
VMf	22	28		2.4905	-4.66423	3.04541		1.85117		2.58364	3.9238	2.68118			10.5271		8.95285	3.57912	3.61137	2.73666	2.23103	2.91827	2.53145			4.03588									2.48804		3.2006
VMf	22	30		-2.96834	-4.35131			0.964484		-0.336982	3.35512	1.21635	-2.5121		9.7673		7.55079	-3.26011	3.45752	1.52638	2.4912	1.81255	2.35471					4.34576		2.25351					2.59491		3.32192
VMf	22	32		-2.92793	-4.70391			0.668643		-2.6959	3.53337	1.24568	-2.26858		10.1166		7.87333		2.95569	1.76805	2.49274	2.55585	1.05403							-2.98607	-2.02153
VMf	22	34						-1.027				-1.08415			8.51434		5.06817				1.13093
VMf	22	35						0.9565			3.1075	1.9401			13.0678		7.61347		3.92314	2.84749	2.51033	2.83568	2.26966
VMf	22	37						0.748			3.14895	2.16615			10.982		9.74676		3.61212	2.32675	2.25113
VMf	23	10						3.0505				1.30823								0.367774	2.56974	0.554308	3.16292												3.25839
VMf	23	15						-1.82				-1.85229								-2.54928	-3.13163	-1.43932	-2.61764														-3.65721
VMf	23	17		2.5102				2.7285		2.38586	2.58452	1.54372								3.38155	2.86026	0.760052	1.29855					4.06381								2.9408	3.67333
VMf	23	18										-1.58047								-2.3765		-1.36146	-2.18172
VMf	23	20		2.52071				2.02329		2.52255	-2.11146	1.35648								-0.455994	2.61905	0.667898	0.507766	2.56602											2.7941		4.00024
VMf	23	22									-2.83646	-1.45094			-9.85598		-8.73289			-2.26849		-1.17958
VMf	23	23		2.57894				1.8105		2.6515		1.10992								0.248671	2.96514	0.690001	0.180337												3.13614		4.49651
VMf	23	24						0.834643		-2.11757		-0.32662					-5.18847			-1.83128	0.474909	0.0268243	0.594342	-1.82034											-2.85273
VMf	23	25	-4.32513	-0.46817	-1.23202	-3.69571		1.48632		-0.242241	-1.63788	-0.404534	-2.66906	-0.808089	5.23654		-6.73395	-3.63863		-1.45383	0.36791	-1.5444	-2.7247	0.12769	-1.91508	3.96633		1.50231	-5.16578	0.830993	-2.99746	-0.507114			0.388546	1.83178	1.39695
VMf	23	26		-2.60745	-3.01013			-0.314333		-2.5377		-1.03106								-2.36676	-1.12907	0.322042	-1.5544												-2.93573	-3.0624	-3.64772
VMf	23	27		-0.0990389				1.31667		0.884039	2.20016	0.758149			2.68828		-9.13422	3.16382		-0.380315	1.75077	0.513877	-0.888629			3.5721		3.82818		2.44029		3.32264			1.17035	2.48282	2.50157
VMf	23	28		2.38159				1.86775		2.41156	3.13864	2.29976								2.14054	2.15432	2.82389	2.54251												2.84259		3.11389
VMf	23	30		-2.73272	-1.31153			0.962519		-1.44841	2.20686	-1.24646					-7.56201	-4.11676	-2.65889	-2.30909	-1.03753	-0.421444	-1.77552		-1.81005			2.81751		2.2589		-3.97642			-1.38377	-3.47066	0.913299
VMf	23	32		-2.6359				1.10722		-2.69136		-0.671102	-1.46656				-6.70734		-2.04661	-2.55656	-0.463721	1.12869	-0.895853		-1.91267					-3.18887	-2.71049	-3.23935			-3.02478	2.90973	-3.4168
VMf	23	34						-0.4335				-1.791					-5.47191			-2.25452	-1.89729		-1.84269												-2.49119
VMf	23	35		-2.56643				0.95675		-2.65413		-0.581859					-5.59863			-2.10911	-2.30583	1.2174	0.839706												-2.31716		-3.40046
VMf	23	37		2.08536				1.62		2.24642	2.7105	1.53808								3.17714	2.65077		-2.13505					3.75312				3.18122			2.6408	2.70301	3.43272
VMf	24	10	3.28838					1.30685		0.746629	-2.32179	1.62442			4.70125					1.22118	0.808334	0.704322	1.85617	2.61544	-0.854541					-2.70672		3.20533			3.16774
VMf	24	15				-4.25357		-1.9415			-2.40844	-2.33129		-3.38548						-2.63646	-2.93727	-2.12302	-3.37301		-2.01596												-3.35295
VMf	24	17		1.40064				0.6235		1.48827	2.62738	1.54453	-2.99437		5.54287			3.45854	1.89905	2.3345	2.00081	0.94375	-0.299017	2.39849	-0.285957	2.88793		3.61672			-3.05515	-3.99082			-1.24188	2.95284	3.26625
VMf	24	18		-2.69762		-3.7042		-1.938		-2.8468	-2.46785	-2.50613		-3.40213					-2.709	-2.73963	-3.00132	-1.9295	-3.31282		-2.11782			-4.72788			-3.07299	-3.85726			-3.07299		-3.47712
VMf	24	20		1.61159		-3.88154		0.596114		1.61329	0.846474	1.6571			5.30235			2.83135		1.80451	1.99022	1.14856	0.449227	1.34881	-0.863106	3.07801		0.137809		-0.267324		2.35502			2.09094		1.01753
VMf	24	22									-3.2596				-11.1987		-8.01373
VMf	24	23		1.87495				-0.2805		1.53727	0.519508	0.9416			4.66408					0.719714	1.20901	0.801863	-1.27325	1.83795	1.54827	-4.32973		-1.8339		-2.68283		-2.18515			1.80947		0.334906
VMf	24	24	-2.89052	0.246828		-2.46156		-0.831632		0.0330776	-0.522386	-0.265333		-2.62544	-3.86019		-5.4101			-0.23305	-0.476513	-0.181622	-1.02626	-2.35394	0.68133	-3.57967		-0.748975		2.47923		0.959236			0.583016		-1.29867
VMf	24	25	-1.55019	-0.0366223	-1.659	-3.4943	2.38456	-0.986737	-5.32326	-0.0953812	-0.647299	-0.133151	-2.51754	-2.39078	4.34702		-2.6768	1.3522	0.911086	-0.0032145	-0.0205641	-1.42342	-3.51961	-0.86354	-0.952248	1.26575		-0.850112	-5.18662	-0.653759	-2.80235	-0.820999	3.38339	-3.27806	0.817121	1.93321	0.0446776
VMf	24	26	-3.86639	-1.50132	-2.76197	-3.19007		-2.08111		-2.18678	-1.66257	-1.53606		-2.50934			-5.38157	2.48169	-0.921926	-1.84319	-1.82782	-0.263454	-1.38851	-2.47796	1.62839	-3.89606		-4.50369		-1.10195		-1.55341			-1.8438	-1.00007	-1.61966
VMf	24	27	2.50989	1.46593	-2.75117	-2.90751		0.374742		1.4783	1.10887	1.41799		-2.7813	4.72613		-5.54516	2.77165	1.82754	1.33662	1.94468	0.671513	-1.84602	2.22463	1.10106	1.94839		3.67793		-0.0460581		1.31674			2.49754	2.41817	3.08799
VMf	24	28		2.68595	-2.95387	2.72615		0.657111	3.53233	2.61063	3.37159	2.47715	1.58525	-3.32514	5.91295		-5.78565	3.62144	2.68494	2.59537	1.87741	2.77968	1.72982		2.06464	3.67301		3.65134		2.3091		3.93519			2.94087	2.79351	3.62779
VMf	24	30		-0.688301	0.580425	-3.30916	3.42178	-0.629234		-1.13664	1.0607	-0.94343	-2.21035	-3.06629	-1.48534		-5.85969	-3.88879	-0.380044	-1.03594	-1.22618	-0.35217	-2.46937		-1.07293	-1.22892		-0.635359		-0.694199	-0.349091	-2.78061		-3.55001	0.141149	0.0803324	-0.137677
VMf	24	32		-1.77469		-3.33869		-0.176104		-2.00462	2.13637	-0.136575	-1.82559	-2.78701			-6.02852		-1.93509	0.18231	0.216936	1.196	-0.941354		-0.220339	-4.58083		-4.21884		-1.39743	-2.34681	-0.847328			-2.89876	3.1958
VMf	24	34				-2.78801		-1.88644		-2.63795		-2.40019					-5.9235		-2.11634	-2.48898	-1.54778	-2.01121	-2.61054												-2.90343
VMf	24	35		0.280056		-3.05208		-1.28827		-1.11675	0.302149	-0.559163					-5.26837		-2.64994	-1.2973	-0.431614	1.31165	-0.740684		2.15939					-2.20506		1.49769			1.3667		-2.89908
VMf	24	37		1.67358				0.366937		1.78506	2.21565	1.49283			3.7147		4.78459	2.40631	2.59032	2.35136	1.78425	-0.677226	-1.56446	2.15378		-4.17667		2.01929				1.22125			1.69386	2.71505	2.62857
VMf	25	10	3.70104	1.57127		3.30971		2.14701		1.88398	0.104198	1.68925	2.41715	-5.6599	5.45994		7.36042	-2.11519	1.34733	1.48577	1.44881	1.82682	3.8614	2.89285	0.334286	-0.188997		3.10978	5.23186	-0.371049	-2.0917	2.34933		-4.06148	3.17527	-1.83927	-2.2371
VMf	25	15		-0.0475091		-4.07597		-1.054		-0.521834	-1.92753	-2.15092	2.79799	-5.81672	-5.40396		2.65755	0.476302		-2.84956	-2.9822	-0.401939	0.666011		-2.2715	-3.91148		-3.84784		-2.79043	-3.4592	-3.4758			-3.05076	-3.09685	-3.86603
VMf	25	17	2.93073	1.50869	-4.09951	3.38212	0.187334	1.67847	3.86028	1.40203	2.87212	1.52414	-1.00085	-4.84473	5.87118		7.93881	3.59077	0.0974085	2.21526	1.98562	2.06913	3.22119	2.38858	0.400815	0.465806		2.82698	5.0476	1.51188	-1.43148	-1.68653	0.0955136	3.88473	0.0961425	2.41741	2.46663
VMf	25	18		-2.98997		-3.28355	-3.90213	-0.913729		-2.92889	-1.65307	-2.25683	-1.43935	-4.82987	-4.94374		1.1743	-1.13324	-3.24569	-3.01865	-3.25704	-0.747795	-3.03935	-2.77819	-2.23959	-4.34948		-4.01817		-2.60598	-2.84134	-3.94514			-1.62611	-3.56303	-4.00293
VMf	25	20	3.04919	2.12918	-0.873685	1.46609	2.21497	1.83113	3.98291	2.05497	1.71284	1.47598	2.55391	-5.01668	4.15678		6.8142	1.0729	0.630823	1.95726	2.28799	2.03184	4.34003	2.25195	-0.00527111	1.86583		2.12934	5.88584	0.964699	-2.16456	2.02942	-3.19658	-4.07208	1.98403	-0.818499	1.15991
VMf	25	22		-2.70485	3.67214	-2.71071		0.033		-2.88095	-3.25785	-2.45809			-9.7466		-8.86636		-3.50058	-2.54994	-2.66502	-0.925293		-2.89673	-2.03647	-4.49953		-4.52903		-0.851334					-2.53577	-3.07306	-3.33949
VMf	25	23	3.41335	1.94408	-3.51504	3.48239	3.63945	0.43688		1.81118	0.811848	0.83943	2.77891	-0.531345	5.13894		6.38257	2.02155	1.79563	0.934287	1.48813	1.82081	3.48023	0.588319	1.74474	-4.48557		1.04736	6.04021	0.242552	2.78775	-0.194151			1.74943	-0.207379	1.25873
VMf	25	24	0.627184	0.49565	-0.211681	2.9374	-0.96015	0.257953	3.72877	0.220946	0.0152902	-0.584817	2.20513	-1.1595	-2.87267	-3.58159	0.0958237	1.49602	-1.03905	-0.468254	-0.229372	1.65967	6.15983	-1.06199	0.923891	-2.71242	-4.6899	0.158468	4.86633	0.449004	1.69296	1.11835	-3.09656	3.41876	-0.792793	0.266984	-1.07925
VMf	25	25	-0.0206702	0.0647167	-0.301198	-0.0574814	1.19878	-0.265597	-0.189346	0.0697799	-0.117493	-0.416549	0.152936	-1.4676	0.117067	-0.0497118	0.919978	0.450209	-0.464901	-0.189194	0.0677443	0.0283224	0.161658	-0.169543	-0.297224	0.329897	-2.79422	0.0957267	-0.362709	0.141473	-1.35585	-0.45907	-0.0255907	-0.250124	0.171058	-0.0633009	0.161544
VMf	25	26	-3.40405	-2.00562	-2.44935	-1.02839	-2.79183	-1.57079		-2.19855	-1.47675	-1.86698	-0.283258	-1.18341	-4.47161	3.53836	-0.593271	-1.31168	-2.11615	-2.32326	-2.07249	1.53696	3.14539	-2.28691	-1.33404	-2.943	-4.8975	-3.78354		-2.03554	-0.519404	-2.07343	-3.50783	3.6678	-2.02016	-2.80072	-2.98208
VMf	25	27	2.42825	1.70973	0.353558	1.65113	1.68939	1.0296	3.52959	1.67345	1.43591	1.16824	1.3815	-3.20223	3.22251	3.31177	-1.22758	2.11644	0.84937	1.03428	1.83953	2.23869	4.4929	2.36509	0.806309	1.8519	-6.83804	2.95242	4.92387	1.14496	2.27805	1.92207	2.41805	3.05875	1.56563	2.48566	2.56919
VMf	25	28	2.55549	2.7298	-1.43279	3.22467	2.4089	1.59583	3.5549	2.71571	3.44796	2.25152	1.84027	-1.41716	5.14389		4.1248	3.19691	2.50613	2.54714	1.97594	3.46699	4.91243		1.91399	3.38517		2.98915	4.54755	2.49929	2.68403	3.6074	3.48888	4.88569	2.75321	3.13715	3.07828
VMf	25	30	-1.91907	-0.227754	-0.262514	1.43095	1.06347	0.852236	1.50298	-0.355058	1.35433	-0.905679	1.5446	-4.07374	-2.60144	3.03358	-4.06274	-2.05367	-1.33117	-0.893669	-0.522505	1.90546	4.70751		-0.140123	-1.79688	-2.6362	-0.981428	4.45865	0.0569777	1.72427	-1.17441	-1.90593	0.350223	-1.22985	-0.958965	-0.761574
VMf	25	32	-2.46506	0.312195	-4.67343	1.86597	-0.357341	1.33057	0.0704672	-0.0801293	2.59517	0.0179411	0.859852	-3.69016	0.799755	-3.01465	-2.74881	1.24317	-1.35813	0.291317	0.917259	3.07933	3.21837		1.21233	-3.40196		-1.43403	1.12651	0.0351742	1.01061	-0.327021	-1.28142	-3.28964	-2.10019	0.526915	-1.65848
VMf	25	34		-1.6329	2.29644	-0.790644		-1.44884		-1.66677	-0.837688	-2.10482	1.82857	-1.41847	-4.08135		-5.01381	-1.94386	-2.33449	-2.6251	-0.743497	0.274369	3.08389			-3.84663		-3.57699	5.56452	-2.34915		-3.53442	-3.24988	2.68093	-3.01991	-0.131397	-3.44555
VMf	25	35	-2.2488	0.394941	0.342596	1.34217	-2.69504	0.328241	-0.611874	-0.110582	1.29529	-0.833388	2.38804	-4.66186	-4.38379		-3.14215	-1.97507	-1.99547	-1.66602	0.139738	2.95033	3.25322		2.41922	-3.85176		-3.12123	5.57239	-0.689672	2.3036	1.09203	-2.80854	2.47743	0.0410479	-0.875949	-2.04585
VMf	25	37	2.65275	2.36245	0.467474	2.96332	3.09322	1.16213	3.41416	2.21794	2.82347	1.45083	2.73603	-4.37715	2.62611		6.51955	2.32516	2.24395	2.33595	2.28032	2.93663	3.75811	2.0289	-0.465041	-0.843247		2.79194	5.52177	1.88277	2.82807	2.14764	3.42042	3.13472	2.12919	2.63587	1.1359
VMf	26	10	3.78934	3.05756				2.077		2.64883	-2.06626	1.85392	1.54088					-3.15382	3.19797	1.80497	1.04474	-0.273761	1.77412		-1.72614					-2.54034				-4.52357	3.84015	-3.17698
VMf	26	15						-2.39067			-2.15291	-2.24685		-3.11838						-2.32316	-2.78704	-3.94943	-3.715
VMf	26	17	2.89955	0.921952		2.83284		1.38146		1.20071	2.77396	1.74368	-2.79679					3.56071	3.36935	2.15754	1.86957	-0.756631	-0.327124			3.22671		3.79866		2.61653	-2.7977	-3.93375			-0.1914	2.86039	2.93521
VMf	26	18		-2.38434		-2.87552		-1.40071		-2.31521	-2.27447	-2.32537	-2.34488	-3.13503				-2.76314	-2.85775	-2.64773	-2.7794	-3.84989	-3.68915									-3.89659			-2.80291	-3.09863
VMf	26	20	3.18487	2.70559		-2.85863		1.51132		2.58965	-0.196703	1.6357		-2.12659				-2.79535	0.409172	2.09236	2.15656	-1.05037	-0.102658	2.39814		3.49133		3.43116		-2.50091		-3.54419		-4.34412	1.46103	-3.51517	2.89228
VMf	26	23	3.36269	2.89766	-1.70886			0.661143		2.82206	-2.10414	1.77874					5.74376		3.40499	1.69172	1.97992	-0.135929	0.806471			-3.89708		3.6002		-2.51645		-3.98364			1.31688		-0.0448639
VMf	26	24	2.91658	1.31326	2.3101	3.4849		0.0561026		1.48016	-1.02903	0.144114		-2.20554	-2.73318	-3.83922	-1.36986	-2.18237	-2.26668	0.260843	-0.340848	-1.89254	-1.79389	-2.1866	-0.828487	1.22512		3.85641				-1.09301			-1.44984		2.83086
VMf	26	25	3.13742	0.161186	0.475921	-0.397837	1.457	-0.73475	-4.73211	0.542268	-0.355368	0.258456	-1.65583	-2.71223	5.01473	-4.64217	0.670482	-0.542488	-1.1034	0.707388	0.242013	-2.87856	-3.4756	-0.942974	-0.669089	0.438477		2.74999	-4.91257	-0.628588	-2.76444	-2.1336	-3.85593	-4.08938	-0.149862	0.462025	0.881019
VMf	26	26		-1.31861	-2.71597			-2.135		-1.2667	-1.74312	-1.80118	-1.1119	-2.24224			0.583827	-2.73277	-2.59352	-1.71673	-1.82645	-2.53624	-2.41714	-2.27278		-0.0156511				-2.64297		-2.04929			-1.65822	-3.01146
VMf	26	27	2.92951	1.80634	1.18361	0.665002		1.12834		1.94894	1.94798	2.00964	-0.826956	-2.5142	4.78246	-4.12941	2.2258	2.19287	1.05781	2.15878	2.22493	-0.277216	-0.981558	1.61276		2.33329		3.85293		0.960581		-2.88276		2.04815	1.37042	2.48086	2.60666
VMf	26	28		2.46097	-3.11333	3.34386		1.26562		2.52335	2.88399	2.24746		-2.51016	4.27121		3.17017	3.10359	1.94479	2.25803	2.05845	3.64118	0.376661			3.85615		3.77764	3.0604	1.95183		3.02432	3.67188		3.15439	2.54939	3.58401
VMf	26	30		-0.295374	1.52894	-0.894702	2.91914	0.462019		0.354253	0.120434	-0.450819	-0.510127	-2.73902	4.47866	-4.62699	-4.29168	-2.5931	-2.03215	-0.181352	-0.684019	-2.16718	-2.33274		-1.82238	-0.631607		2.00403		-1.19903		-2.6382	-3.85593	-4.56434	-2.0148	-0.586825	2.08141
VMf	26	32		-1.67549				1.21791		-0.714057	1.94308	0.479736	-1.52652	-2.57539			-4.6698	0.745598	-2.12494	1.14312	0.897895	-0.0036115	-0.799974			-3.46808				-2.35273	-1.72091	-3.40395		-4.33139	-2.89939	2.91382
VMf	26	34			2.27763			-2.89167			-1.50199	-1.5289					-5.46151	-2.26969	-2.45045	-2.60222	-0.142318	-3.65986	-1.79751												-2.9233
VMf	26	35		0.308868	2.04029			-0.1168		0.283341	-1.99959	-0.156478		-1.93739			-5.58824	-2.23325	-2.28366	-1.18568	0.0373369	-1.28339	-1.14694			-3.15939				-2.03868		0.205903			0.439439		-2.38223
VMf	26	37	2.96151	2.40408	2.26759			0.91235		1.4672	2.1112	1.51018		-2.01169			6.20707	1.38556	2.47528	2.0245	1.78977	-0.51959	-1.2376			-0.742925		3.60171				-3.54807			2.48147	2.6226
VMf	27	10	3.4438	2.5608				2.8305		2.67289		2.53772			5.90915		9.91431		1.9936	2.23701	1.738	1.90148	2.98928									3.43639			3.4762
VMf	27	15						-2.21625			-2.29206	-2.71354			-5.06902		9.83262	-2.76077		-2.64135	-3.14379	-1.764						-3.62115									-3.25008
VMf	27	17		2.45172	2.10116			2.5085		2.47066	2.43034	2.57276	-2.63623		6.589		11.3824		2.16498	2.6763	2.44823	1.99645	2.14404				8.9023	4.30383		2.11327		2.90022			2.48193	2.61374	3.22705
VMf	27	18						1.1005				-1.154	-2.31759				10.2383										8.50984
VMf	27	20	2.5536	2.43197	2.6109		2.52484	2.21008		2.38798	2.72931	2.33223			5.87756		11.1197		2.00276	2.42615	2.61635	1.98033	2.13065					4.1032		2.28326		3.2875			2.85241		3.28872
VMf	27	22						1.207			-3.01412				-9.08427		-8.83093
VMf	27	23		2.86169	3.34451			0.637714		2.58148	0.484557	1.60137		3.02605	5.87199		11.3882		2.20061	0.887375	1.55761	1.99041	2.5568		1.21152		6.98867	-3.95414		2.39734		3.5003			2.17837		1.79768
VMf	27	24	3.04594	1.91429	2.58309	2.84375		0.37574		1.41522	-0.210035	0.706455		3.58057	1.35209	-2.59293	7.58521	-2.85466	0.718803	-0.0463969	-0.120052	1.51226	2.98244	-2.38823	1.31916	-2.38117	7.67922	-1.38237		2.54574		3.4969	-2.71134		1.01835		0.819071
VMf	27	25	1.0204	1.12176	1.70395	-1.90056	2.91185	1.00449	0.0531748	0.594684	-0.125595	0.604251	-1.67161	3.37401	0.782699		8.08891	-1.9625	0.855169	0.11398	0.0180524	-0.975184	-2.14206	-1.89786	-0.460985	0.493268	7.93038	-1.39426	-4.73431	1.88192	-3.05614	2.92373	-3.68082	-3.15666	0.765092	-0.0553599	0.730989
VMf	27	26		-1.18995	-0.279217		2.29909	-0.573187		-1.52678	-1.02904	-0.534472	-1.08461	3.31347	-1.522		9.85692	-0.650469	-0.515679	-1.40976	-1.09187	1.67621	2.0136	-2.3842	0.891686		7.91805	-3.46896		-0.518819		3.9368	-2.78189		-1.16378	-2.92309	-2.35617
VMf	27	27	2.30585	1.17924	1.25091	-2.54409	2.15253	0.713129		0.782538	0.772257	1.69933	-0.576549		2.23962		4.24903	-0.426888	0.60494	0.622729	1.15348	0.900911	1.42185		0.764308	0.49201	7.82537	1.69237		0.785173		2.9192	-2.49268		1.49469	2.26944	2.34586
VMf	27	28	2.25669	2.63788	2.31263	2.45039	2.394	1.96794	3.36727	2.55617	3.85003	2.67706	1.27505	2.95019	5.52001		11.1246	3.1397	2.13502	2.61055	1.90814	3.35677	2.44841		1.32794	3.19301		4.34342		2.23456		3.65612	3.39647		3.01912	2.50519	3.87585
VMf	27	30	2.33712	2.03205	2.24541		3.31212	0.855352	2.69969	1.25436	0.953467	-0.00220622	-0.573393	2.95419	0.145778		6.27915	-2.70336	-0.307588	-0.733323	-0.829691	1.71607	1.97352				7.3011	-1.69261		2.53397		3.34298		-3.07531	0.419098	-1.09366	0.940301
VMf	27	32		-0.174625	2.04196		3.18316	1.05231		-0.957827	1.38082	0.301629	-1.65592	-2.5646	1.65858		6.51004	-1.8026	-0.342601	-0.250676	-0.0497225	3.01862	1.29561		-0.0884116		7.85553	-3.53743		0.475335	-2.49119	3.51404		-3.41115	-1.20664	-1.58813	-3.00966
VMf	27	34			2.61201			-1.58017		-1.49459	-1.82096	-2.47848	0.415764		-2.77285		-1.219	-2.00143	-1.59107	-2.33705	-1.08284		0.463462			-2.21569	6.04022	-2.71614					-2.37837		-2.33132		-2.23272
VMf	27	35		0.465874	2.4655	-1.75728		0.850437		-0.475222	0.674762	0.720676	-0.723469		-1.25857		4.44052	-1.60196	-0.427607	-1.30061	-0.167901	3.35049	2.0913			-2.35615		-2.41014		0.311931		0.340515			0.36099	-1.58384	-1.47867
VMf	27	37		2.85756	2.60198			0.9045		2.55153	2.66534	1.61056			2.26116		11.3319	1.59935	2.05394	2.4375	2.13262		1.57208				10.2397	4.27375		1.64436		3.13438			2.67149	2.37595	2.87117
VMf	28	10		-0.0961422		-2.76273		-0.164		-0.0784794	-3.91821	0.331724						-4.8605		-0.777105	-0.37087	-2.95336	1.33928		-2.16239	-3.72298				-2.52689					0.431197	-3.24393	-3.85015
VMf	28	15				-4.11252		-2.287			-3.51144	-2.96077						-3.19997		-2.8183	-2.53602	-3.68211	-3.07164		-2.02474										-2.6409		-3.85267
VMf	28	17		-0.17897				-1.0271		-0.716564	-2.03016	0.0773262	-2.94341					-4.25185	-2.85748	0.072719	1.25069	-2.23907	0.523267		-2.19589			3.20633			-3.06415	-3.91239	-4.38066		-1.55958	2.66945	0.663338
VMf	28	18		-3.05797		-3.56316		-2.9452		-3.12248	-3.75809	-3.62691	-2.84595		-5.29582			-4.25482	-2.89444	-3.44918	-2.79279	-3.812	-3.1329		-1.90684	-3.77433		-3.87362			-2.97833	-3.6172	-3.41782		-3.11338	-3.16557	-3.81505
VMf	28	20		1.0338		-3.7405		-0.488714		1.02969	-1.94643	1.08293			-0.865905			-2.2364	-2.42549	1.11402	2.3147	-1.18929	0.943844		-2.17053	-3.76754		0.236258		-0.987957		-1.13412	-3.77185		0.683712	-3.58211	0.250391
VMf	28	22															-6.57299
VMf	28	23		-0.634564	-2.20676	-3.01859		-2.3876		-0.734067	-3.41501	-0.700609					5.14379	-3.60303		-1.41154	-0.315752	-1.67787	-0.209608			-4.32112		-0.533492		-2.50301		-3.91435	-3.68506		-0.191511	-2.83226	1.17378
VMf	28	24		-1.04043	-0.714408	-1.21487		-1.82041		-1.31364	-3.33842	-1.40136	-1.3887	-2.12386	-4.82491		-3.20495	-3.42194	-2.33831	-1.91076	-0.569487	-2.23094	-0.841483		-1.26474	-3.47676		0.567235	-2.73451	0.287086		-0.386812	-3.4413		-2.09509		-1.5194
VMf	28	25	-0.727493	-1.08491	-1.32614	-3.05176	0.533139	-2.549	-4.109	-1.16969	-3.12514	-1.47947	-2.07062	-2.05389	-3.56462	-4.75742	-1.72151	-3.25756	-2.19642	-1.80963	-0.518908	-3.13052	-2.67492		-2.2881	-2.24336		-1.36909	-4.15585	-1.36375	-2.95162	-2.06672	-3.89864	-4.75548	-1.54107	-1.48577	-0.783381
VMf	28	26	-3.10052	-2.27893	-2.78557	-3.04903	-2.82339	-2.55294		-2.34456	-3.56935	-2.142	-1.77549		-4.95344		-0.576261	-3.1847	-2.89371	-2.78998	-1.53411	-1.9041	-1.49745			-3.53241		-3.61825		-1.01955		-2.65965	-3.78515		-2.47676	-3.16315	-2.42198
VMf	28	27		0.138015	-0.414584	-2.93407		-2.04461		0.0827735	-1.69758	-0.291369	-1.51726	-2.42864	0.915221		-0.978935	-1.78297	-2.04508	-1.16008	1.50636	-2.52321	-1.14537			-1.38728		3.53788		-0.782151		-2.94814	-3.72676		0.241985	2.31541	2.57708
VMf	28	28		2.94821	-3.61123	2.67365		-1.1152	3.25078	2.90192	3.95219	1.51294		-2.69476	4.77246		2.29013	0.865537		1.74103	2.40655	3.28849	1.48425			3.40525		3.24592		2.18696		3.38816			3.11905	2.56091	4.30211
VMf	28	30		-1.61362	-0.51096	-3.04913	0.116692	-1.93536	-3.49406	-1.73871	-2.98954	-2.16435	-1.62627	-2.56148	-4.72697		-5.27113	-3.71263	-2.42128	-2.38195	-1.37101	-2.64888	-1.39204		-2.25955	-3.26057		-2.31568	-3.20529	-1.76063		-3.1875	-3.76996	-4.87802	-2.70821	-2.19049	-2.27169
VMf	28	32		-0.536598	-3.65091	-2.67276	-2.81401	-2.10359		-0.830334	-3.51363	-1.24583	-1.59511	-2.09051	-4.43512		-5.73253	-3.17373	-2.00928	-1.73725	-0.160441	-0.775636	-0.316966			-3.77747		-3.69989		-2.10857	-2.14688	-3.42552	-3.45333	-5.21385	-2.93554	-1.38664	-3.30767
VMf	28	34		-2.38929		-2.64697		-2.18411		-2.58943	-3.52371	-2.90039	-1.07124		-5.00885		-6.13137	-3.26339	-2.56472	-3.02371	-1.68851	-3.30946	-1.89377			-2.86657						-2.64931	-3.86625		-3.15677		-3.22732
VMf	28	35		-0.311099		-2.91103		-1.96169	-3.44489	-0.709217	-3.52332	-1.46241	-1.50353		-5.24969		-5.82724	-3.40003	-2.27941	-2.52834	-0.191845	-0.785473	-0.180563			-3.58343				-2.02523		-0.707737	-3.42078		-0.656967		-1.76995
VMf	28	37		1.22983	2.59213			-2.11283		1.16533	-0.892194	0.457062	-1.31638				5.68007	-1.14162	1.59842	2.15756	1.24644	-3.68588	-0.882589			-4.16806		-0.334746				-0.479213			-0.61011	2.43167	-0.396949
VMf	30	10	3.90621	3.01373		3.00625		1.8643		2.84928	-2.27851	2.31335	2.33252		5.04403		8.15452	4.4765	2.80578	2.43579	2.13895	1.68838	2.86607		0.118443			4.36252				3.83022			3.2134	4.14608	2.90611
VMf	30	15						-1.76563		2.61419	-2.61977	-0.954152					7.95598	3.42253		-2.52737	-2.67908	-2.04869	-2.55457		-2.70998			-3.63086		-2.63508	-4.82568				-2.74777		-3.57302
VMf	30	17	2.76439	2.44609	-1.12234	3.04985		1.18304	2.93894	2.33904	2.76535	2.15954	-1.83079		5.56703		8.45292	3.51117	2.73833	2.71314	2.6877	1.44262	1.70211		-2.88114	3.70068		3.78708		1.74083	-4.81962	1.29643	3.85324		2.70987	3.06158	3.12074
VMf	30	18						-0.540478			-2.42876	-0.386006					8.25065	4.65538		-2.52071	-2.9721		-1.37544		-2.48008						-4.5794				3.67346
VMf	30	20	3.21734	2.64545	-1.42487	3.16695	2.77688	1.6132	3.35917	2.61769	0.467372	2.16581	2.3289		5.1897		8.84101	3.7133	2.671	2.64705	2.89032	1.84678	1.83806		0.0508789	4.05092		3.65185		2.25125		3.63823			2.6736	3.64268	3.26696
VMf	30	22						-1.484			-3.02412	-1.89557			-10.4604		-8.16304				-2.86209
VMf	30	23	3.18498	2.31927	-1.63041			-0.293188		2.35808	-1.61481	1.29915			5.00687		6.70015	4.19562	3.01279	1.30967	2.06357	0.812109	1.45359		2.14313	-3.76694		1.77653		0.882766		2.33184			2.66687	1.60294	2.21764
VMf	30	24	3.43483	1.58351	-0.767575	2.99322	-2.77597	-0.260209		1.52939	-1.55485	0.779828	1.89579	3.52529	2.06008		7.41093	3.68912	0.669954	1.07336	1.0807	0.456755	1.44506		0.260537	0.409628		2.44604		0.487064	2.6722	2.98199	-2.71387	3.8743	1.4199	3.20572	0.210217
VMf	30	25	2.29877	1.42089	-0.577859	-0.0085957	2.21609	-0.0544213	-0.0288966	1.34147	-1.04819	0.708512	-1.17214	1.12777	3.79776	5.1131	6.00422	2.33246	1.50917	1.15499	1.29374	-1.32528	-2.32237		-0.573222	2.90691	7.28376	2.34543	-4.73753	0.97638	-2.85338	2.21304	2.42228	2.0079	2.25637	1.99284	2.11844
VMf	30	26	-3.15756	-0.643881	-2.33776	2.44861	-0.529732	-1.44475		-0.897671	-2.14351	-0.599878	-0.800669	3.25819	0.49919	4.1977	6.96048	1.48153	-0.757426	-1.07987	-0.809192	-0.194074	-0.253055		-2.31087	3.59414		-2.30939		-1.03343	2.31109	1.96789		5.84897	0.112648	-1.70055	-2.48085
VMf	30	27	2.47566	2.0883	-1.18351	1.91047	1.40677	0.115286	2.52064	2.04	1.04727	1.81736	0.375304		4.76502		2.21706	2.31856	1.43997	1.62971	2.31567	1.37487	0.634944		0.180224	2.73869	-8.07551	3.41137		1.63865	2.19312	2.49618	3.1315	3.55346	2.33945	2.7075	2.77753
VMf	30	28	2.92281	2.66521	-2.83313	2.89863	2.64605	1.31938	3.37558	2.64373	3.25475	2.33838	1.4074	2.89491	5.12239		6.74807	3.07812	2.32486	2.50285	2.08194	3.11015	2.26467		1.88477	3.8654		3.55563	3.23208	2.4196	2.57754	3.4313	3.57166	5.4282	3.03625	3.04724	3.3745
VMf	30	30	2.73025	1.63769	0.816375	2.00507	3.20312	0.317078	2.89874	1.31518	0.965854	0.337236	0.629947	3.03911	2.13703	5.1131	1.79389	0.0464615	0.880026	0.55837	0.837653	0.979951	0.58718		-0.41748	2.71134	7.28376	2.78433		1.40665	0.112634	2.39843	3.5577	3.87686	1.98617	1.68911	2.45374
VMf	30	32		0.701642	-2.93478	2.93103	3.49955	0.679341	3.39821	0.444392	1.66103	0.987762	-0.136645	-2.94222	4.38591		6.52964	4.01021	0.762103	1.10496	1.89799	2.45454	1.06816		0.94995			0.126998		0.421686	-1.20104	2.73877	4.40806	-2.70906	0.838115	2.23225	1.4001
VMf	30	34		-0.731246	3.18464			-1.65472		-1.08965	-2.91778	-1.2223	1.95693		-1.65261		-0.000541121	0.390926	-2.28059	-2.18095	-0.207635	-3.03257	-1.03008					-2.72585		-2.09901					-2.97974	3.54711	-3.34865
VMf	30	35		1.72304	-0.84882	1.56998	-2.91334	0.119727	-2.92957	1.39349	-2.55579	0.677566			-1.89543		5.62295	0.882951	-0.666295	-0.834157	1.16481	2.5302	1.4896		2.43003	-2.95751		-1.15986		-0.66144	2.8979	3.55535			2.48018	3.60382	-1.83898
VMf	30	37	2.78381	2.46983	3.17461	2.47437		0.929626		2.48563	2.6162	1.93704			4.05748		6.55506	2.53957	2.27806	2.62176	2.44471	2.73606	0.970072					3.73885				3.09901	3.42042	3.61104	2.64566	3.0827	2.66161
VMf	32	10	3.74328	3.80982		2.17381		3.15075		3.32518		2.31982	2.51539	2.65896				-2.65462	2.83248	2.37582	2.23518	2.7975	3.07143		2.03804	2.97975		4.23643	3.25389	3.44302		3.70219			3.45864	2.89812	2.73251
VMf	32	15		2.69701				-0.8595		2.67446		-1.81144								-2.54997	-2.59031	-2.78439	-2.46635							3.24943
VMf	32	17	2.42113	3.44007		2.40189	2.40769	0.809	3.09525	2.93009		1.45872	2.14248	2.08341				3.55477	2.45041	2.16562	1.7306	0.453096	1.02718		1.77466	3.49817		3.06825	3.05647	3.15362	2.20096	3.14584	2.53666		2.48302	1.49426	3.22095
VMf	32	18						1.6788										-2.26394					1.00941							2.0118					2.71688
VMf	32	20	2.68915	3.28641		1.95216	2.77938	2.39605	3.31693	3.05683	-1.93104	2.12724	2.0756	2.70294				-2.64231	2.77123	2.62226	2.87578	2.54237	1.9426		1.70544	3.82692		2.96573		3.08013	2.14395	3.77143			2.8056	2.87526	3.21494
VMf	32	22		2.05034				1.052		1.97407			1.66668	3.16328			-6.45036													2.03726
VMf	32	23	2.84173	3.05747			2.39551	-0.629385		3.11204		0.315381	1.62232	2.93354			4.90644		3.03949	-0.234466	-0.308987	-0.341501	0.322312		2.24266			3.52453	2.68042	0.98236	2.5941	3.7661			3.09813	-0.0699996	0.264885
VMf	32	24	2.38982	2.81101		2.28478	2.37497	-0.494389	3.6495	2.73706	-3.3609	-0.301613	1.68469	2.70029	-3.91748			-1.68317	1.75686	-0.449816	-0.977441	-1.33923	0.319247		1.47518	3.05382		3.32985		2.75515	2.14476	3.61718	-2.86312	3.23828	2.41005	1.25293	3.16223
VMf	32	25	2.60387	1.95042	3.14975	-0.217443	3.02166	-0.462034	2.57777	1.67416	-2.25209	-0.15019	1.36261	2.58756	0.484356	3.99869	3.87984	-0.948959	1.77136	-0.264978	-0.52065	-2.35729	-1.94889		1.15171	3.4328		2.82034	0.0193117	1.99345	-0.400636	2.57011	1.61181	2.82051	2.5698	0.517536	2.96951
VMf	32	26		0.271165		2.09571	-0.529459	-1.8375		0.325545	-4.10919	-1.45008	1.53046	2.82609		4.15265		-2.23357	0.538016	-2.26889	-2.28559	-2.66182	-1.66782		1.59269	3.32157				0.101305	2.60477	-0.178558	2.62302	3.77221	-0.98899	-1.84301	3.0259
VMf	32	27	2.26513	2.67054	-2.11131	0.962357	2.23947	0.235026	2.95011	2.55086	-0.977616	1.09448	1.51078	1.94803	2.99272	2.90636	1.78354	1.366	1.53079	0.67466	1.21156	-0.811874	0.258166		1.66725	3.10543	-6.12025	3.19947	1.88614	2.17376	2.26051	2.93961	2.78416	2.55699	2.59412	2.61884	2.95875
VMf	32	28	2.48802	3.55795		2.55197	2.64855	1.292	3.57533	3.27327	2.66095	2.21982	1.98427	2.57722	3.20904	3.74789	4.86981	2.49132	2.76412	2.23059	2.18069	3.44715	2.18645		2.10984	2.94458		2.39726	3.40507	3.35803	2.51942	3.56349	3.47789	4.65468	2.70577	3.33056	3.08554
VMf	32	30	1.94051	2.70924	2.06202	2.10072	2.67434	0.189508	3.06055	2.59922	0.573053	-0.292276	1.68628	2.34838	-3.52648	4.52846	-5.42803	-2.47739	1.66718	-0.757531	-0.90546	-0.933089	-0.0369692		1.82516	3.2741		3.33416	2.67203	2.6119	2.18041	3.32039	2.2363	2.53764	2.68191	0.194704	3.25775
VMf	32	32		3.13116		2.0986	3.52044	0.702028	3.82146	3.01672		0.362905	1.99411	2.31004				-1.19955	2.12808	0.460054	0.656177	1.32157	0.711699		2.14419	2.33218				2.94697	2.51669	3.47993	3.17515		2.28954	1.48125	3.04778
VMf	32	34		2.4634				-1.94842		2.3582		-1.3106	1.71341	2.49057			-3.48364	-1.77049	-0.320997	-2.46666	-1.16156	-2.86069	-0.435317							2.19176				2.21375		2.29915
VMf	32	35	2.87245	2.89772				-0.18035	4.25485	2.02638		-0.160649	1.67201	2.5398	-2.91323		-3.61036	-1.73405	1.08155	-1.81484	-0.532053	0.0275133	0.643612		2.17979	2.94263			2.11677	2.66681	3.19158	2.68983		2.01025	3.33555	0.621008	3.3118
VMf	32	37	2.44055	3.41503		1.64194	1.84928	1.14594	2.64461	3.06897		1.79489	1.57944	1.93552			5.12357	2.3777	2.43771	2.46791	2.31869	2.5932	0.843757		1.43318	2.11632		2.87924	2.40593	3.55557	2.60664	3.08483	2.18751	2.81891	2.60278	3.83291	2.98034
VMf	34	10						2.692				2.3721
VMf	34	17		2.49923				2.51233		2.73714		2.99798								3.40894	3.48269	1.97478	1.91504												2.87941
VMf	34	20		2.50975				2.5945		2.61059		2.74759								3.21884	3.69924	1.95349	1.91052												3.26838
VMf	34	23		2.56797				1.632		2.73954		2.62775								2.88715	3.44031		2.19312												3.61043
VMf	34	24						1.475				1.76478
VMf	34	25	2.59498	2.5096	-2.70422			1.84519		2.56082	0.956723	2.22359			5.09423		6.55753	2.74489	2.12865	3.20533	2.41587	0.713986	-6.04864			3.93518									3.28578		3.19385
VMf	34	26						-0.916
VMf	34	27		2.09063				2.00429		2.20008	2.19387	2.88817			5.8961					3.00235	3.44007		1.27877												3.23348		3.01674
VMf	34	28						1.39333				2.00661										2.77814
VMf	34	30						1.94007			3.4846	1.25189								3.21533		2.97002	-1.6514
VMf	34	32						2.04683				1.6595										3.12937	1.46399
VMf	34	35						1.992				1.54762										3.03993
VMf	34	37		2.0744				1.601		2.33446	2.52611	2.46638							2.84842	3.02208	3.12594														3.11508
VMf	35	10						1.5344		-2.79307		1.83235								1.15765	0.459037	-3.14034	1.27263		-2.18141
VMf	35	15						-2.33467				-1.92368								-2.63093	-2.65124	-3.15631	-2.58014								-3.40372
VMf	35	17		-3.00736				0.66325		-1.16924		1.60939	-2.69111		5.6223			3.10686	2.30213	2.87326	2.58029	-1.95759	-0.0798946								-3.39766	-4.55873			-3.35604
VMf	35	18		-2.93329				-2.2262		-2.83789		-1.97647							-3.28378	-2.9555	-2.3247	-3.0893	-2.44163								-3.31184	-4.1768			-3.25175
VMf	35	20		-2.94815				1.09819		-2.81707	-3.06814	1.8155			4.3142				2.48873	1.7001	0.726596	-3.05468	0.376317		-2.24588							-4.16917			-3.22014
VMf	35	22													-8.93408		-6.69028				-1.4793
VMf	35	23						-0.500714				1.01105							2.68658	1.04294	-0.391953	-3.11295	-0.447605									-4.60863			-3.23325		-3.92092
VMf	35	24		-2.89686				-1.23131		-2.76044	-2.78885	-0.315491							2.84511	0.443999	-1.32278	-2.42694	-1.75895									-3.98568			-3.18904
VMf	35	25	0.163313	-2.5219	-2.62028	-3.29467	0.656431	-1.19988	-5.66255	-1.8472	-1.50291	0.0469227	-2.07842		4.75517		0.270891	1.59901	0.826395	0.0572915	-1.14192	-3.0669	-2.91529		-2.40928	1.43459		3.77336	-5.6514	-1.52407	-3.24678	-4.01127		-4.86756	-2.29738	-1.49179	-1.18632
VMf	35	26		-3.0815	-2.22194			-2.36323		-2.96241		-1.34631	-0.941323						-0.921042	-1.95379	-1.97259	-3.87839	-2.92878									-4.50446			-3.38354
VMf	35	27		-2.47086		-2.94445		0.168182		-2.52039	2.09259	1.54437	-0.618185		4.33603		-0.0429826	2.16241	1.83988	1.41428	1.14117	-2.8977	-1.33719			3.41083		3.81344				-3.50774			-3.0189		2.91698
VMf	35	28				2.94393		0.397857		2.67159	2.87174	2.47457			4.24144			2.36159	2.4737	2.37179	1.6443	2.86605	1.86771
VMf	35	30		-3.05784	-3.12895	-3.47078		-0.584483		-2.44469	1.16914	-0.69477	-0.60541		2.15371		-5.79109	-3.33058	-0.755104	-0.489867	-1.7007	-2.71535	-1.78641		-2.27857			3.54515		-3.21507		-4.27144			-2.76036	-4.00149	0.00609015
VMf	35	32		-2.69114				0.438087		-2.92764		-0.0861421	-1.91583						0.92211	0.25613	-0.643766	-0.887801	-0.425168									-3.98512			-3.12401
VMf	35	34						-2.4584		-2.7415		-2.11394					-6.16919		-2.59353	-2.6262	-1.68022	-2.98056	-1.83696												-3.70753
VMf	35	35		-2.73762				-1.32367		-2.65609		-0.640676					-4.54773		-3.22472	-1.52632	-1.31378	-1.48078	-0.916942									-3.7971
VMf	35	37		-2.95015				0.0834167		-2.92955	2.60596	1.52289					5.00162	2.22138	2.42802	1.41113	2.15688	-2.96319	-1.14115									-4.17306			-3.5751
VMf	37	10						1.3035		-0.433761		0.95239								-1.00404			3.0381												3.83851
VMf	37	15						-1.0118			-2.75927	-1.88875								-3.74463	-2.81726
VMf	37	17		-1.5477				0.745889		-1.47654	2.65556	0.704283	-2.92963					3.52299		-1.17081	2.75617	1.99225	2.11312					3.80614							2.74698	2.83388
VMf	37	18		-3.66834				-0.06325		-3.57012		-1.74789								-4.48888
VMf	37	20		2.72074				1.39454		-0.402651		0.696847								-1.17962	3.00502	1.97097	1.69489	2.66328				3.60551							3.10349
VMf	37	22										-1.77883			-10.8022		-8.2134			-4.09153
VMf	37	23		2.77897				-0.247		2.92759		-0.267832								-1.92752	-0.795548		2.49573												3.478
VMf	37	24		-0.557092				-0.287429		-0.830541	-2.77634	-1.09106					-5.72475		-1.94931	-2.83793	-1.59596	2.10307	1.03981	-2.20241				0.842346							0.427551
VMf	37	25	-0.958289	-2.56191	1.12359	-4.50844		-0.0640469		-2.22919	-1.05329	-1.09299	-2.91263		6.49992		-6.8274	-0.612611	-2.27185	-2.83516	-1.52054	-2.2519	-3.91918	-0.823071	1.22667	4.24318		1.162		-0.536815	-3.12124	3.78882		-3.41448	0.960195	0.279972	1.20856
VMf	37	26		-3.30611	-2.12195			-1.93325		-3.35696	-2.68248	-2.04008							-2.66503	-3.96392	-2.70324		-2.40251	-2.23115				-2.67275							-2.44039	-3.19058
VMf	37	27		0.857522		-2.29513		0.0742778		0.359689	0.328954	-0.0568259			5.99225		-7.27896	0.516512	-2.04583	-2.22971	0.790141		1.47194			3.41904		2.86416							1.38715	2.56217	2.90166
VMf	37	28		2.43762				1.64825		2.73075	3.04733	1.81542						3.00998		1.24707		2.88374	1.9485
VMf	37	30		-2.52113	3.15962	-4.71997		0.416839		-2.57299	-0.551503	-1.1974					-7.61511	-2.50981	-2.87006	-3.2942	-1.53895	2.76092	1.15965			3.61387		1.33582		2.48428		3.48176			0.532017	0.01543	3.62559
VMf	37	32		-3.65141				0.372895		-3.39143	-2.50403	-0.818533	-2.21926				-7.24362	-2.79927		-2.45646	-1.25045	2.90375	0.443558					-3.31547						-3.37808	-2.52944	-0.792578
VMf	37	34						-1.31383		-3.47373	-2.10836	-1.86796					-6.76466	-2.29408	-2.28251	-3.62211	-2.27389		-0.386683												-1.99585
VMf	37	35		-2.73989				-0.109333		-2.81869	-1.79622	-1.33886			-2.71044		-6.89138	-2.33017	-2.128	-3.83352	-1.88349	3.14554	1.00118					-1.96904				-2.36969			-1.82181		-2.33668
VMf	37	37		2.28539				1.76625		-0.569636	2.78155	1.2211						2.75364		-1.43738	2.54667		1.13601					3.77605							2.98265	2.59609
